# Supplementary material
Source: HighWire-hosted journal article supplement (https://www.cmajopen.ca/highwire/filestream/89435/field_highwire_adjunct_files/2/open-2022-0191-original-submission.pdf)

**CoPE-HCP clinical investigators (Supplementary)**

Ashish Kotecha<sup>1</sup>, Abhishek Kumar<sup>2</sup>, Azara Janmohamed<sup>3</sup>, Satheesh Nair<sup>4</sup>

**Affiliations:**

<sup>1</sup>Royal Devon and Exeter Hospital, Exeter, Devon, United Kingdom.

<sup>2</sup>Wrightington, Wigan and Leigh NHS Foundation Trust, United Kingdom.

<sup>3</sup>St George's University Hospitals NHS Foundation Trust, London, United Kingdom.

<sup>4</sup>Glan Clwyd Hospital, Betsi Cadwaladr University Health Board, Wales, United Kingdom.

Confidential

1  
2  
3 **1 Title**  
4

5  
6 2 The relationship between the level of (and changes in) perceived workplace support and mental  
7 3 health, wellbeing and burnout in healthcare professionals (HCP) during the COVID-19  
8 4 pandemic: insight and mitigating strategies from the CoPE-HCP cohort study.  
9

10  
11 **5 Authors**  
12

13  
14 6 Imrana Siddiqui\*<sup>1,2,3</sup> MBBS (joint first author), Jaya Gupta\*<sup>4</sup> MRCPsych (joint first author),  
15 7 Iris McIntosh<sup>5</sup> MRCPsych, Christina Komodromos<sup>6</sup> BSc, Thomas Godec<sup>7</sup> PhD, George  
16 8 Collett<sup>7</sup> PhD, Sher Ng<sup>8</sup> MB BChir, Carmela Maniero<sup>7,8,9</sup> PhD, Sotiris Antoniou<sup>8</sup> MRPharmS,  
17 9 Rehan Khan<sup>9</sup> MRCOG, Vikas Kapil<sup>7,8,9</sup> PhD, Mohammed Y. Khanji<sup>7,8,10</sup> MRCP, and Ajay K.  
18 10 Gupta<sup>7,8,9,11\*\*</sup> PhD, on behalf of COPE-HCP clinical investigators\*\*\*.  
19  
20  
21  
22

23 **11 Affiliations**  
24

25 12 <sup>1</sup>Wellbeing Hub, Newham Training Hub, London, United Kingdom.  
26

27  
28 13 <sup>2</sup>NHS NorthEast London CCG, London, United Kingdom.  
29

30 14 <sup>3</sup>Woodgrange Medical Practice, London, United Kingdom.  
31

32 15 <sup>4</sup>South West London and St George's Mental Health NHS Trust, London, United Kingdom.  
33

34 16 <sup>5</sup>Camden & Islington Foundation Trust, London, United Kingdom.  
35

36 17 <sup>6</sup>Barnet, Enfield and Haringey Mental Health NHS Trust, London, United Kingdom.  
37

38 18 <sup>7</sup>William Harvey Research Institute, Queen Mary University of London, London, United  
39 19 Kingdom.  
40

41 20 <sup>8</sup>Barts Heart Centre, St. Bartholomew's Hospital, Barts Health NHS Trust, London, United  
42 21 Kingdom.  
43

44 22 <sup>9</sup>The Royal London Hospital, Barts Health NHS Trust, United Kingdom.  
45

46 23 <sup>10</sup>. Newham University Hospital, Barts Health NHS Trust, London, United Kingdom.  
47

48 24 <sup>11</sup>National Heart and Lung Institute, Imperial College London, London, United Kingdom.  
49

50  
51  
52  
53  
54  
55 25

56  
57 26 \*Joint first authors (contributed equally to this manuscript).  
58  
59  
60

1  
2  
3 \*\*Corresponding and senior author: Ajay K. Gupta, William Harvey Research Institute, Queen  
4 Mary University London, London, United Kingdom. [ajay.gupta@qmul.ac.uk](mailto:ajay.gupta@qmul.ac.uk)  
5

6  
7 The corresponding author attests that all listed authors meet authorship criteria and that no  
8 others meeting the criteria have been omitted.  
9

10  
11 \*\*\*See supplementary document for COPE-HCP Clinical Investigators names and affiliations.  
12

### 13 14 **Funding Statement**

15  
16 Barts Charity. The funders had no role in the study design, data collection, data analysis, data  
17 interpretation, or writing of the report.  
18

19  
20 **Word count:** 3115  
21  
22  
23  
24  
25  
26  
27  
28  
29  
30  
31  
32  
33  
34  
35  
36  
37  
38  
39  
40  
41  
42  
43  
44  
45  
46  
47  
48  
49  
50  
51  
52  
53  
54  
55  
56  
57  
58  
59  
60

Confidential

## Abstract

### 2 Background

3 COVID-19 pandemic is associated with psychological impact amongst healthcare  
4 professionals (HCPs). However, little is known about the relationship between workplace  
5 support (WS) and mental health and burnout amongst HCPs, and the effective strategies  
6 mitigating this impact.

### 7 Methods

8 In the CoPE-HCP cohort study, online surveys were distributed at baseline (July-September  
9 2020), and at follow-up (~four months later) assessing the presence of generalized anxiety  
10 disorder (GAD), clinical insomnia, major depressive disorder (MDD), burnout (emotional  
11 exhaustion and depersonalization), and wellbeing. Both surveys assessed self-reported level of  
12 WS. For baseline and follow-up, independently, separate logistic regression models relating  
13 the level of WS to mental health and burnout were developed after adjusting for a priori  
14 confounders. Linear regression models were also developed relating the change in the  
15 perceived level of WS with the change in mental health scores from baseline and follow-up.  
16 Thematic analyses on baseline survey free-text entries were done to evaluate what constitutes  
17 effective support.

### 18 Findings

19 At baseline ( $n = 1422$ ) and follow-up ( $n = 681$ ), consistently, compared to those who felt  
20 unsupported, those who felt supported had reduced risk (odds) of GAD (baseline: 58% [95%  
21 CI of OR, 0.30-0.60], follow-up: 40% [0.36-1.00]), clinical insomnia (42% [0.40-0.85], 59%  
22 [0.23-0.72]), MDD (58% [0.30-0.59], 57% [0.27-0.69]), emotional exhaustion (65% [0.26-  
23 0.46], 58% [0.28-0.63]) and depersonalization (58% [0.28-0.61], 69% [0.19-0.50]).

24 In the cohort of those who responded to both surveys, the improvement in perceived level of  
25 WS from baseline was associated with significantly improved GAD-7 (adjusted difference. -  
26 0.13 [-0.25, -0.01]), PHQ-9 (-0.17 [-0.29, -0.04]), and SWEMWBS (wellbeing) (0.19 [0.10,  
27 0.29]) scores, independent of baseline level of support.

1  
2  
3 1 We identified five themes constituting effective workplace support: 1) concern/understanding  
4 2 for welfare, 2) information, 3) tangible qualities of the workplace, 4) leadership, and 5) peer  
5 3 support.  
6  
7  
8

9  
10 4 **Interpretation**  
11

12 5 These findings highlight nuanced associations between perceived level of (and changes in) WS  
13 6 and mental health and burnout of HCPs, and identifies potential strategies constituting effective  
14 7 workplace support.  
15  
16  
17

18  
19 8 **Trial registration**  
20

21 9 Clinicaltrials.gov (NCT04433260).  
22  
23  
24 10

Confidential

## 1 Introduction

2 The coronavirus (COVID-19) pandemic has posed a significant peril to both the physical and  
3 mental health of the general population. In particular, the significant toll on healthcare  
4 professionals (HCPs) is a critical issue that, if not addressed, will impact staffing and service  
5 provisions in the future.<sup>(1, 2)</sup> The potential increased vulnerability to mental health issues  
6 amongst HCPs could be explained by the unique challenges faced by them, including vicarious  
7 trauma,<sup>(3)</sup> moral injury,<sup>(4-7)</sup> and substantially increased risk of infection.<sup>(8)</sup> Long working hours,  
8 discrimination for working in hospitals, and workplace practices may also contribute to the  
9 psychological impact.<sup>(9)</sup> Indeed, recent meta-analyses and studies have attested to this  
10 considerable toll, with reported prevalence rates of anxiety (26.1%),<sup>(10)</sup> depression (24%),<sup>(11)</sup>  
11 and burn-out (49.4%)<sup>(12)</sup> among HCPs during the pandemic. As such, high quality research  
12 identifying the factors associated with improved mental health outcomes in HCPs, and likely  
13 strategies to mitigate them, is an urgent need.<sup>(2)</sup>

14 Workplace support is one potential strategy. Relating to previous severe acute respiratory  
15 syndrome (SARS) outbreaks, *Brooks et al.* recommend the critical role of managers/employers  
16 in ensuring clear communication, supportive environments, specialised training, and support  
17 systems to promote psychological wellbeing.<sup>(13)</sup> Concerningly, a cross-sectional survey during  
18 the first wave of the COVID-19 pandemic (data collected from 30<sup>th</sup> March 2020 to 5<sup>th</sup> May  
19 2020) found that most respondents (UK HCPs) felt there was inadequate wellbeing support.<sup>(14)</sup>  
20 The study, along with other small qualitative studies, also highlight the perceived value of  
21 organisational support to the mental health in HCPs.<sup>(14-19)</sup> Some cross-sectional quantitative  
22 studies support an association between workplace support and mental health in HCPs<sup>(20-24)</sup> and  
23 suggesting workplace support to mitigate the psychological burden in HCPs. However, these  
24 studies have limitations: most are cross-sectional,<sup>(20-25)</sup> some are small<sup>(21, 25)</sup> or offer a non-  
25 comprehensive assessment of mental health (and neglect issues such as burnout),<sup>(20, 22)</sup> or only  
26 focus on qualitative or quantitative aspects of support.<sup>(15, 16, 20-25)</sup> Therefore, to inform national  
27 and global policy and workplace practices, we require robust high-quality studies using  
28 comprehensive mental health assessments demonstrating improvements in mental health over  
29 time.<sup>(26)</sup>

30 Addressing this, the current study (part of the COVID-19 and Physical and Emotional  
31 Wellbeing of Healthcare Professionals project; CoPE-HCP)<sup>(27)</sup> examined the relationship  
32 between perceived level of workplace support and mental health outcomes: generalized anxiety

1 disorder, clinical insomnia, major depressive disorder, burnout (emotional exhaustion and  
2 depersonalization), and wellbeing twice during the pandemic (approximately four months  
3 apart). We also examined whether changes in perceived level of workplace support was  
4 associated with improved mental health and wellbeing outcomes over the four-month period.  
5 Finally, we explored what workplace support HCPs want or have found helpful.

## 6 **Methods**

7 The protocol for this cohort study is published.<sup>(27)</sup> The study was approved by the Cambridge  
8 East Research Ethics Committee (20/EE/0166), and registered in ClinicalTrials.gov  
9 (NCT04433260).

10 The study involved a series of online surveys distributed to HCPs (in the UK and  
11 internationally). The inclusion criteria for the study were: 1) aged 18 or older, 2) electronic  
12 consent given, and 3) self-identified as HCP staff. Recruitment was facilitated by health service  
13 employers who invited employees by email containing a link to the survey, and the participants  
14 were those who responded to that invite.

15 Initial consent was gained for the baseline survey, and at the end of the baseline survey,  
16 participants were then asked for their consent to receive any follow-up surveys. Further consent  
17 was gained at the follow-up survey.

18 The baseline survey was conducted between July and September 2020. In the UK, this  
19 corresponded to the trough of the first wave of COVID-19. The baseline survey gathered  
20 information such as age, gender, ethnicity, relationship status, educational attainment, and  
21 current mental health and physical health diagnosis (a multiple-choice closed-ended item).

22 Our primary predictor, workplace support, was assessed by asking participants “Do you think  
23 you received adequate support directly from your supervisors/line managers/direct employers?  
24 (Mark on scale, with 1 -as no support and 10 as full and professional support)”. This was  
25 converted to a 3-level response with scores of 1-3, 4-6, and 7-10 being labelled as ‘felt  
26 unsupported’, ‘neither felt supported nor unsupported’, and ‘felt supported’ respectively. ‘Felt  
27 unsupported’ served as the reference group in the analysis. A subsequent free-text item was  
28 included eliciting qualitative data about what support they found most helpful or felt would be  
29 helpful, to supplement perceptions of workplace support.

30 *Outcome ascertainment*

1  
2  
3 1 At each survey, we assessed for the presence of generalized anxiety disorder (using the 7-item  
4  
5 2 Generalized Anxiety Disorder [GAD-7]),<sup>(28)</sup> clinical insomnia (using 7-item Insomnia Severity  
6  
7 3 Index [ISI]),<sup>(29)</sup> major depressive disorder (using 9-item Patient Health Questionnaire [PHQ-  
8  
9 4 9]),<sup>(30)</sup> burnout domains: emotional exhaustion and depersonalization (using single respective  
10  
11 5 7-point scale items)<sup>(32)</sup>, and wellbeing (using the Short Warwick-Edinburgh Mental Wellbeing  
12  
13 6 Score [SWEMWBS]).<sup>(31)</sup>

14  
15 7 The follow-up survey (approximately four months after baseline during the second peak of the  
16  
17 8 pandemic) included the same mental health assessments and the same item assessing level of  
18  
19 9 workplace support (excluding free-text item). For transparency, due to survey error, the support  
20  
21 10 item at follow-up provided a score between 0 and 100 (as opposed to 0-10 at baseline survey)  
22  
23 11 which was similarly collapsed to a 3-level response: 0-30, 31-69, and 70-100 being labelled as  
24  
25 12 ‘felt unsupported’, ‘neither felt supported nor unsupported’, and ‘felt supported’, respectively.

### 25 13 *Statistical analysis*

26  
27  
28 14 Statistical analyses were conducted using STATA v17.0. Baseline characteristics were  
29  
30 15 compared between those who responded to the follow-up survey and are part of HCP cohort,  
31  
32 16 and those who only responded to first survey and constitute the findings from baseline cross-  
33  
34 17 sectional analysis.

35  
36  
37 18 At each survey time point, we separately assessed for the cross-sectional association between  
38  
39 19 the perceived level of support and the presence of outcomes: generalized anxiety disorder,  
40  
41 20 clinical insomnia, major depressive disorder, below average wellbeing, emotional exhaustion,  
42  
43 21 and depersonalization, in accordance with validated cut-offs of respective tools. Logistic  
44  
45 22 regression models were developed to estimate crude and adjusted odds ratios (with 95%  
46  
47 23 confidence intervals, and p-values) in each perceived support group as compared to the  
48  
49 24 reference group (perceived unsupported). The multivariable models were adjusted for pre-  
50  
51 25 specified risk factors: age, gender, time since COVID-19 peak in the participant’s region,  
52  
53 26 highest level of education, relationship status, number of people living in their household,  
54  
55 27 currently diagnosed mental health condition (yes/no), currently diagnosed physical health  
56  
57 28 condition (yes/no), and HCP role (medical doctors [reference group] vs. healthcare assistants,  
58  
59 29 nurses and midwives, and AHPs).

56  
57 30 For cohort analysis, i.e. those who responded to both baseline and follow-up surveys, the  
58  
59 31 change in mental health and burnout symptoms was calculated by subtracting the baseline raw  
60  
61 32 score from the follow-up score (follow-up score was rescaled by dividing by 10) on the



1  
2  
3 1 respective scales. Changes in perceived workplace support was calculated by subtracting the  
4  
5 2 baseline raw score (regarding adequate workplace support) from the follow-up score. Separate  
6  
7 3 unadjusted and adjusted (adjusted for the above risk factors and for baseline perceived level of  
8  
9 4 support) linear regression models were conducted assessing the extent that the change in  
10  
11 5 perceived level of workplace support is associated with changes in mental health and burnout  
12  
13 6 symptoms over time.

### 14 7 *Thematic analysis*

15  
16 8 The free-text item was analysed using thematic analysis<sup>(33)</sup> by four researchers (JG, IS, IM,  
17  
18 9 CK). Responses were analysed inductively, meaning no pre-selected themes were used to start  
19  
20 10 with, and the analysis was data-driven. First, the raw data was collated into an Excel table and  
21  
22 11 each of the above researchers familiarised themselves with the data. Initial codes were  
23  
24 12 generated for each entry of data and were shared amongst the researchers before being refined  
25  
26 13 as a coding dictionary. Any data entries with limited detail regarding the type of support were  
27  
28 14 regarded as ‘unspecified’ and not included in refining of codes. The data entries and refined  
29  
30 15 codes were reviewed and amalgamated into key themes (selected based on salience and the  
31  
32 16 apparent significance to the participants) and subthemes to best describe the data.

### 33 17 **Results**

34  
35 18 1574 HCPs were included at baseline cross-sectional assessment, and amongst them 744  
36  
37 19 (47.3%) who responded to the follow-up survey comprised of the cohort population and also  
38  
39 20 the separate cross-sectional analysis for the follow-up period only (Figure 1; Table 1).

40  
41 21 Most of the 1574 HCPs at baseline were from the UK (n = 1321; 83.9%). Of the HCPs based  
42  
43 22 outside the UK (n = 253; 16.1%), most were from North America (37.2%) followed by Asia  
44  
45 23 (34.4%) and Europe (17.4%). Reporting the non-UK country where they were based was  
46  
47 24 optional: of the 202 respondents, 70 (34.7%) were from the USA followed by 63 (31.2%) from  
48  
49 25 India. A total of 30 different countries comprised the non-UK participants.

50  
51 26 At baseline (n = 1574; specific number varies for each outcome), 19.9% of 1429 HCPs met the  
52  
53 27 criteria for generalized anxiety disorder, 16.1% of 1418 HCPs for clinical insomnia, 24.7% of  
54  
55 28 1434 HCPs for major depressive disorder, 41.9% of 1386 HCPs for emotional exhaustion, and  
56  
57 29 13.4% of 1386 HCPs for depersonalization. At cross-sectional evaluation of the follow-up  
58  
59 30 stage (n = 744; specific number varies for each outcome), we observed increased or sustained  
60  
31 outcome rates for generalized anxiety disorder (20.8% of 723 HCPs), clinical insomnia (16.3%

1  
2  
3 of 722 HCPs), major depressive disorder (28.0% of 724 HCPs), emotional exhaustion (43.2%  
4 of 717 HCPs), and depersonalization (21.2% of 717 HCPs).

### 5 6 7 *Baseline group and cohort population of HCPs*

8  
9  
10 The baseline characteristics of those who only responded to the baseline survey (n = 1574)  
11 were mostly similar to those who responded to both surveys (n = 744), except for significant  
12 differences in self-defined ethnicity, gender identity and number of people living in the  
13 household (Table 1; Supplemental Table 1). Baseline-only responding participants had  
14 relatively higher proportions of self-assigned Asian ethnicity and male gender and belonged to  
15 the bigger household (Supplemental Table 1). Mental health outcomes were not significantly  
16 different between those who only responded to the baseline survey and those who responded  
17 to both surveys according to chi squared analysis (Supplemental Table 1).  
18  
19  
20  
21  
22

### 23 24 *Perceived level of support at baseline and follow-up*

25  
26  
27 In independent cross-sectional assessments, 1422 participants provided valid data on perceived  
28 level of support at baseline and 681 of them provided similar data at follow-up too. As per our  
29 pre-defined 3-level categories (based on the Likert scales) measuring perceived support, 48.5%  
30 of the 1422 HCPs at baseline reported feeling supported with similar proportions observed in  
31 the follow-up sample (47.9% of 681 HCPs), whilst 21.9% of the baseline sample felt  
32 unsupported with 24.5% of the follow-up sample felt unsupported (Supplementary Table 2; see  
33 Supplementary Figure 1-3 for percentage distribution of responses for baseline and follow-up  
34 perceived level of support, and for the change in perceived support from baseline to follow-  
35 up).  
36  
37  
38  
39  
40  
41

### 42 43 *Relationship between support and mental health and burnout outcomes*

44  
45 At baseline (Figure 2), there was a statistically significant relationship between level of support  
46 and each mental health and burnout outcome ( $p$  for trends were all  $<0.01$  except for clinical  
47 insomnia  $p = .013$ ). Compared with those who felt unsupported, respondents who felt supported  
48 were significantly less likely to meet the criteria for generalized anxiety disorder (adj. odds  
49 ratio 0.42, 95% CI 0.30 to 0.60), clinical insomnia (0.58, 0.40 to 0.85), major depressive  
50 disorder (0.42, 0.30 to 0.59), emotional exhaustion (0.35, 0.26 to 0.46), and depersonalisation  
51 (0.43, 0.28 to 0.64). On the SWEMWBS wellbeing measure, those who felt supported were  
52 significantly more likely to have medium or high wellbeing (3.17, 2.30 to 4.37).  
53  
54  
55  
56  
57  
58  
59  
60

1 Based on 681 valid responses at follow-up (Figure 3; median 4.9 months after baseline survey),  
 2 compared to those who felt unsupported, those who felt supported were significantly less likely  
 3 to meet the criteria for clinical insomnia (0.34, 0.20 to 0.58), major depressive disorder (0.46,  
 4 0.30 to 0.70), emotional exhaustion (0.39, 0.27 to 0.58), and depersonalisation (0.32, 0.20 to  
 5 0.51). Similarly, on the SWEMWBS wellbeing measure, those who felt supported were more  
 6 likely to have medium or high wellbeing (2.72, 1.73 to 4.27). Borderline significance was met  
 7 for generalized anxiety disorder (0.60, 0.36 to 1.00) when comparing perceived supported to  
 8 perceived unsupported HCPs.

### 9 *Change in level of workplace support and improvement in mental health outcomes over time*

10 In the cohort of participants with data at both baseline and follow-up (n = 681), there was a  
 11 consistent association between the change in perceived level of support and the change in  
 12 scores on some, but not all, mental health outcomes (Table 2). Separate adjusted linear  
 13 regression models showed that a whole unit increase in change in perceived level of support  
 14 was inversely associated with the change in GAD-7 anxiety scores (coefficient -0.13 [-0.25 to  
 15 -0.01]  $p = .04$ ), PHQ-9 depression scores (-0.17 [-0.29 to -0.04]  $p < 0.01$ ), and positively  
 16 associated with the change in SWEMWBS wellbeing scores (0.19 [0.10 to 0.29]  $p < 0.001$ ).  
 17 No significant associations were observed between change in perceived level of support and  
 18 the change in ISI insomnia ( $p = 0.067$ ) or EEDP2Q burnout scores ( $p = 0.139$ ).

### 19 *Themes: what constitutes effective support*

20 860 free-text entries were included in the thematic analysis to illustrate what qualities/aspects  
 21 of workplace support are perceived as most helpful. We identified 5 overarching themes  
 22 describing: 1) concern or recognition regarding welfare, 2) information, 3) tangible qualities of  
 23 the workplace, 4) leadership, and 5) peer support (see Table 3 for full details and exemplar  
 24 quotes).

### 25 **Interpretation**

26 This large cohort study demonstrates that, during the COVID-19 pandemic, HCPs who felt  
 27 supported at baseline (compared with those who felt unsupported) had a significantly lower  
 28 risk (odds) of generalized anxiety disorder, clinical insomnia, major depressive disorder,  
 29 emotional exhaustion, depersonalization, and below-average wellbeing. This association was  
 30 also observed at follow-up (albeit borderline significance for generalized anxiety disorder),  
 31 more than four months after baseline, demonstrating consistency and reliability in these

1  
2  
3 1 findings. Importantly, to our knowledge, this is the first study to report associations between  
4 2 changes in perceived level of workplace support and changes in mental health symptoms in  
5 3 HCPs over time during the pandemic: improvement in perceived support was significantly  
6 4 associated with improved scores on measures of generalized anxiety disorder, major depressive  
7 5 disorder, and wellbeing (independent of baseline perceived level of support), but not for  
8 6 insomnia or burnout. Furthermore, a unique aspect of this study is the rich qualitative data  
9 7 illustrating what qualities of workplace support are perceived by HCPs to be helpful during the  
10 8 pandemic. This inclusion of qualitative data can inform the design of intervention studies to  
11 9 establish a causal relationship between workplace support and mental health.

12 10 This study builds on and validates the hypothesis generated by a few recent cross-sectional  
13 11 studies showing associations between workplace support and mental health outcomes in HCPs  
14 12 during the current pandemic,<sup>(21, 22, 36)</sup> and previous outbreaks.<sup>(37)</sup> While a small cohort study in  
15 13 routine work environment has shown that level of co-worker and managerial support is  
16 14 inversely associated with general mental distress,<sup>(38)</sup> we have not found any studies – in routine  
17 15 or pandemic settings - that have evaluated the prospective relationship between perceived  
18 16 improved workplace support and changes in mental health, wellbeing, and burnout.

19 17 Most policy and guidance suggest a benefit of improving workplace support on general mental  
20 18 health, and indeed our findings support this notion regarding depression, anxiety, and wellbeing  
21 19 in HCPs. However, whilst we observe a trend between change in perceived level of support  
22 20 and insomnia and burnout scores over time, these associations were non-significant. This  
23 21 highlights the relevance of improvements in perceived workplace support to distinct mental  
24 22 health issues, and we speculate that other workplace factors which are not accounted for in this  
25 23 analysis (e.g. long working hours) are more likely to impact on burnout and insomnia.

26 24 Regarding our qualitative findings, these are consistent with previous workplace guidance for  
27 25 healthcare systems. The WHO has advised how HCPs and their managers can promote their  
28 26 psychosocial wellbeing during the COVID-19 pandemic: taking care of basic needs, ensuring  
29 27 staff communication is up-to-date and of high quality, use of buddy systems, psychological  
30 28 first aid, and ensuring staff access to mental health support services.<sup>(39)</sup> Our findings also mirror  
31 29 previous reviews stating that clear communication through horizontal (peer-peer) and vertical  
32 30 (managers/trusts-employees) networks can buffer against the psychological impact.<sup>(26)</sup> Many  
33 31 participants also reported daily updates being useful as a means of support. In the UK, Enabling  
34 32 Quality Improvement in Practice encourages embedding daily huddles into work practice with

1  
2  
3 1 the goal of safety and improvement - we suggest these daily huddles should include a wellbeing  
4  
5 2 'check-in' element.  
6

7 3 Intrinsic to workplace support is the support for managers themselves which was reflected by  
8  
9 4 a few comments in our qualitative data. Previous qualitative work highlighted how managerial  
10  
11 5 support was integral to more positive workplace experience during the Ebola epidemic, but  
12  
13 6 also managerial stress was reflected onto the HCPs.<sup>(40)</sup> Therefore, we must consider the  
14  
15 7 potential impact of managerial mental health on the quality of support delivered to employees,  
16  
17 8 which was not explicitly examined in our survey.

18 9 There are some limitations to this study. First, the data was collected between July and  
19  
20 10 December 2020, at the trough and second peak of the UK COVID-19 pandemic, respectively.  
21  
22 11 Despite the pandemic still ongoing, our findings remain highly relevant due to the fluctuating  
23  
24 12 levels of cases and persistent mental health burden in HCPs. Secondly, while we account for  
25  
26 13 the time since COVID-19 peak in participants' region, non-UK participants may have  
27  
28 14 experienced varying public health policies which may be a confounder. Third, there is potential  
29  
30 15 selection bias because our survey was accessible online only, and the respondents may not be  
31  
32 16 representative of all HCPs (those with self-identified female gender and white ethnicity were  
33  
34 17 more likely to respond to the follow-up survey). However, our observed rates of mental health  
35  
36 18 outcomes are similar to other large surveys in the UK general population,<sup>(34)</sup> and no significant  
37  
38 19 differences were observed for mental health between baseline-only and follow-up (cohort)  
39  
40 20 participants, therefore we anticipate our cohort findings to be generalisable to the healthcare  
41  
42 21 workforce regardless of possible self-selection bias. Fourth, the issue of bidirectionality  
43  
44 22 remains relevant despite reporting data at two time points: HCPs with lower mental health may  
45  
46 23 perceive workplace support to be lower because their needs are greater. Despite this, we believe  
47  
48 24 that participants primarily rate their level of support based on their observations of the available  
49  
50 25 support strategies in the workplace. Finally, most free text responses were generated from a  
51  
52 26 double-barrelled question asking what support was useful and what was desired. This does not  
53  
54 27 invalidate the themes but we are unable to concretely distinguish between what support was  
55  
56 28 helpful and what was lacking.

57 29 In conclusion, we demonstrate a consistent association between perceived level of workplace  
58  
59 30 support and the mental health and wellbeing of HCPs during the pandemic. Improved perceived  
60  
31 workplace support was associated with improved scores on anxiety, depression, and wellbeing  
32 measures over time but was not associated with insomnia or burnout. Further studies are

1  
2  
3 1 required to understand the workplace factors associated with insomnia and burnout in HCPs  
4 2 during the pandemic, and to understand the causal relationship between perceived workplace  
5 3 support and mental health in HCPs. Our findings are likely to inform significant changes in  
6 4 guidance and national policies targeted at improving wellbeing in HCPs during the current and  
7 5 future pandemics.  
8  
9

#### 10 **Declaration of interests:**

11  
12  
13 7 AKG (chief investigator and corresponding author) declares that CoPE-HCP study received  
14 8 part funding from Barts Charity, and declares no other conflict of interest.  
15  
16  
17  
18

#### 19 **Authors contributions:**

20  
21 10 AKG is the chief investigator and corresponding author for this study had access to all of the  
22 11 data in the study and takes full responsibility for the integrity of the data and the accuracy of  
23 12 the data analysis. Below are the detailed author contributions  
24  
25  
26

27 13 Conceptualization: AKG, VK, MYK, JG, IS, CM, SN

28 14 Data curation: AKG, TG, GC

29 15 Formal analysis: AKG, TG, JG, IS, IM, CK, GC

30 16 Funding acquisition: AKG, VK

31 17 Resources and software: AKG, TG

32 18 Supervision: AKG

33 19 Investigation: *all authors and investigators*

34 20 Methodology: AKG, VK, MYK, JG, IS, CM, SN, RK, SA

35 21 Project administration: AKG, GC

36 22 Writing original draft: IS, JG, AKG, IM, CK, TG, GC

37 23 Writing-review and editing: *all authors and investigators*

#### 38 24 **Funding**

39 25 Barts Charity.

#### 40 26 **Role of funding source**

1  
2  
3 1 The funders had no role in the study design, data collection, data analysis, data interpretation,  
4 2 or writing of the report.

7 3 ***Patient and public involvement***

9 4 No patients or members of the public were directly involved with the design, or conduct, or  
11 5 reporting, or dissemination plans of the research.

14 6 **Data sharing statement**

16 7 Anonymised data, data dictionary, and survey materials will be made available upon request.  
18 8 Study protocol is available at <https://doi.org/10.3389/fpsyg.2021.616280>.

21 9 **Acknowledgements:**

22 10 We would like to acknowledge the extensive support received from the Barts Education  
24 11 Academy and William Harvey Research Institute for sharing some of their resources needed  
26 12 to conduct this study. In particular, we wish to acknowledge the excellent contribution of the  
28 13 following: Julekha Khanam from Barts Health NHS Trust, Elaine Colaco and Martyn Clark  
29 14 from Barts Education Academy, Tania Toma from Imperial College Healthcare NHS Trust,  
31 15 and Ade Alele, Professor Mark Caulfield, and Amrita Ahluwalia from William Harvey  
33 16 Research Institute.

35 17 **Transparency declaration:**

37 18 AKG (the manuscript's guarantor) affirms that the manuscript is an honest, accurate, and  
39 19 transparent account of the study being reported; that no important aspects of the study have  
41 20 been omitted; and that any discrepancies from the study as planned (and, if relevant,  
43 21 registered) have been explained.

## References

1. Stuijzand S, Deforges C, Sandoz V, Sajin C-T, Jaques C, Elmers J, et al. Psychological impact of an epidemic/pandemic on the mental health of healthcare professionals: a rapid review. *BMC Public Health*. 2020;20:1-18.
2. Holmes EA, O'Connor RC, Perry VH, Tracey I, Wessely S, Arseneault L, et al. Multidisciplinary research priorities for the COVID-19 pandemic: a call for action for mental health science. *Lancet Psychiatry*. 2020;7(6):547-60.
3. Li Z, Ge J, Yang M, Feng J, Qiao M, Jiang R, et al. Vicarious traumatization in the general public, members, and non-members of medical teams aiding in COVID-19 control. *Brain Behav Immun*. 2020;88:916-9.
4. Wang Z, Harold KG, Tong Y, Wen J, Sui M, Liu H, et al. Moral injury in Chinese health professionals during the COVID-19 pandemic. *Psychological Trauma: Theory, Research, Practice, and Policy*. 2021;Advance on.
5. Zerach G, Levi-Belz Y. Moral injury and mental health outcomes among Israeli health and social care workers during the COVID-19 pandemic: a latent class analysis approach. *European journal of psychotraumatology*. 2021;12.
6. Lamb D, Gnanapragasam S, Greenberg N, Bhundia R, Carr E, Hotopf M, et al. Psychosocial impact of the COVID-19 pandemic on 4378 UK healthcare workers and ancillary staff: initial baseline data from a cohort study collected during the first wave of the pandemic. *Occupational and Environmental Medicine*. 2021;0:1-8.
7. Plouffe RA, Nazarov A, Forchuk CA, Gargala D, Deda E, Le T, et al. Impacts of morally distressing experiences on the mental health of Canadian health care workers during the COVID-19 pandemic. *Eur J Psychotraumatol*. 2021;12(1):1984667.
8. Shanafelt T, Ripp J, Trockel M. Understanding and Addressing Sources of Anxiety Among Health Care Professionals During the COVID-19 Pandemic. *JAMA*. 2020;323:2133-4.
9. Yang Y, Lu L, Chen T, Ye S, Kelifa MO, Cao N, et al. Healthcare Worker's Mental Health and Their Associated Predictors During the Epidemic Peak of COVID-19. *Psychol Res Behav Manag*. 2021;14:221-31.
10. Raoofi S, Kan FP, Rafiei S, Khani S, Hosseini Fard H, Tajik F, et al. Anxiety during the COVID-19 pandemic in hospital staff: systematic review plus meta-analysis. *BMJ Supportive & Palliative Care*. 2021;0:1-9.
11. Olaya B, Pérez-Moreno M, Bueno-Notivol J, Gracia-García P, Lasheras I, Santabárbara J. Prevalence of Depression among Healthcare Workers during the COVID-19 Outbreak: A Systematic Review and Meta-Analysis. *Journal of Clinical Medicine*. 2021;10:3406.
12. Prasad K, McLoughlin C, Stillman M, Poplau S, Goelz E, Taylor S, et al. Prevalence and correlates of stress and burnout among U.S. healthcare workers during the COVID-19 pandemic: A national cross-sectional survey study. *EClinicalMedicine*. 2021;35.
13. Brooks SK, Dunn R, Amlôt R, Rubin GJ, Greenberg N. A Systematic, Thematic Review of Social and Occupational Factors Associated with Psychological Outcomes in Healthcare Employees during an Infectious Disease Outbreak. *Journal of Occupational and Environmental Medicine*. 2018;60:248-57.
14. Siddiqui I, Aurelio M, Gupta A, Blythe J, Khanji M. COVID-19: Causes of anxiety and wellbeing support needs of healthcare professionals in the UK: A cross-sectional survey. *Clinical Medicine*. 2021;21:66-72.
15. Billings J, Seif NA, Hegarty S, Ondruskova T, Soulios E, Bloomfield M, et al. What support do frontline workers want? A qualitative study of health and social care workers' experiences and views of psychosocial support during the COVID-19 pandemic. *PLoS ONE*. 2021;16:e0256454.
16. Kang B-A, Kwon S, You M, Lee H. Perceived sources of occupational burn-out and embitterment among front-line health workers for COVID-19 control in Gyeonggi province, South Korea: a qualitative study. *Occupational and Environmental Medicine*. 2021;0:1-8.



- 1 17. Vera San Juan N, Aceituno D, Djellouli N, Sumray K, Regenold N, Syversen A, et al. Mental  
2 health and well-being of healthcare workers during the COVID-19 pandemic in the UK: contrasting  
3 guidelines with experiences in practice. *BJPsych Open*. 2020;7(1):e15.
- 4 18. Berkhout SG, Sheehan KA, Abbey SE. Individual- and Institutional-level Concerns of Health  
5 Care Workers in Canada During the COVID-19 Pandemic: A Qualitative Analysis. *JAMA Netw Open*.  
6 2021;4(7):e2118425.
- 7 19. Buckley L, Berta W, Cleverley K, Widger K. Exploring Pediatric Nurses' Perspectives on Their  
8 Work Environment, Work Attitudes, and Experience of Burnout: What Really Matters? *Front Pediatr*.  
9 2022;10:851001.
- 10 20. Khajuria A, Tomaszewski W, Liu Z, Chen J-h, Mehdian R, Fleming S, et al. Workplace factors  
11 associated with mental health of healthcare workers during the COVID-19 pandemic: an  
12 international cross-sectional study. *BMC Health Services Research*. 2021;21:1-11.
- 13 21. Cyr S, Marcil M-J, Marin M-F, Tardif J-C, Guay S, Guertin M-C, et al. Factors Associated With  
14 Burnout, Post-traumatic Stress and Anxio-Depressive Symptoms in Healthcare Workers 3 Months  
15 Into the COVID-19 Pandemic: An Observational Study. *Frontiers in Psychiatry*. 2021;12:668278.
- 16 22. Wanigasooriya K, Palimar P, Naumann DN, Ismail K, Fellows JL, Logan P, et al. Mental health  
17 symptoms in a cohort of hospital healthcare workers following the first peak of the COVID-19  
18 pandemic in the UK. *BJPsych Open*. 2021;7(1).
- 19 23. Munn LT, Liu TL, Swick M, Rose R, Broyhill B, New L, et al. Original Research: Well-Being and  
20 Resilience Among Health Care Workers During the COVID-19 Pandemic: A Cross-Sectional Study. *Am  
21 J Nurs*. 2021;121(8):24-34.
- 22 24. Havaei F, Ma A, Staempfli S, MacPhee M. Nurses' Workplace Conditions Impacting Their  
23 Mental Health during COVID-19: A Cross-Sectional Survey Study. *Healthcare (Basel)*. 2021;9(1).
- 24 25. Hines SE, Chin KH, Glick DR, Wickwire EM. Trends in Moral Injury, Distress, and Resilience  
25 Factors among Healthcare Workers at the Beginning of the COVID-19 Pandemic. *International  
26 Journal of Environmental Research and Public Health*. 2021;18:488.
- 27 26. Pollock A, Campbell P, Cheyne J, Cowie J, Davis B, McCallum J, et al. Interventions to support  
28 the resilience and mental health of frontline health and social care professionals during and after a  
29 disease outbreak, epidemic or pandemic: a mixed methods systematic review. *Cochrane Database  
30 Syst Rev*. 2020;11:CD013779.
- 31 27. Khanji MY, Maniero C, NG S, Siddiqui I, Gupta J, Crosby L, et al. Early and Mid-Term  
32 Implications of the COVID-19 Pandemic on the Physical, Behavioral and Mental Health of Healthcare  
33 Professionals: The CoPE-HCP Study Protocol. *Frontiers in Psychology*. 2021;12:39.
- 34 28. Spitzer RL, Kroenke K, Williams JB, Lowe B. A brief measure for assessing generalized anxiety  
35 disorder: the GAD-7. *Arch Intern Med*. 2006;166(10):1092-7.
- 36 29. Morin CM, Belleville G, Belanger L, Ivers H. The Insomnia Severity Index: psychometric  
37 indicators to detect insomnia cases and evaluate treatment response. *Sleep*. 2011;34(5):601-8.
- 38 30. Kroenke K, Spitzer RL, Williams JB. The PHQ-9: validity of a brief depression severity  
39 measure. *J Gen Intern Med*. 2001;16(9):606-13.
- 40 31. Tennant R, Hiller L, Fishwick R, Platt S, Joseph S, Weich S, et al. The Warwick-Edinburgh  
41 Mental Well-being Scale (WEMWBS): development and UK validation. *Health Qual Life Outcomes*.  
42 2007;5:63.
- 43 32. Li-Sauerwine S, Rebillot K, Melamed M, Addo N, Lin M. A 2-Question Summative Score  
44 Correlates with the Maslach Burnout Inventory. *Western Journal of Emergency Medicine*.  
45 2020;21:617.
- 46 33. Braun V, Clarke V. Using thematic analysis in psychology. *Qualitative Research in Psychology*.  
47 2006;3:77-101.
- 48 34. Shevlin M, McBride O, Murphy J, Miller JG, Hartman TK, Levita L, et al. Anxiety, depression,  
49 traumatic stress and COVID-19-related anxiety in the UK general population during the COVID-19  
50 pandemic. *BJPsych Open*. 2020;6.

1  
2  
3  
4  
5  
6  
7  
8  
9  
10  
11  
12  
13  
14  
15  
16  
17  
18  
19  
20  
21  
22  
23  
24  
25  
26  
27  
28  
29  
30  
31  
32  
33  
34  
35  
36  
37  
38  
39  
40  
41  
42  
43  
44  
45  
46  
47  
48  
49  
50  
51  
52  
53  
54  
55  
56  
57  
58  
59  
60

1 35. Jordan J-A, Shannon C, Browne D, Carroll E, Maguire J, Kerrigan K, et al. COVID-19 Staff  
2 Wellbeing Survey: longitudinal survey of psychological well-being among health and social care staff  
3 in Northern Ireland during the COVID-19 pandemic. *BJPsych Open*. 2021;7:e159.  
4 36. Khajuria A, Tomaszewski W, Liu Z, Chen J-h, Mehdian R, Fleming S, et al. Workplace factors  
5 associated with mental health of healthcare workers during the COVID-19 pandemic: an  
6 international cross-sectional study. *BMC Health Services Research* 2021;21:1-11.  
7 37. Preti E, Di Mattei V, Perego G, Ferrari F, Mazzetti M, Taranto P, et al. The Psychological  
8 Impact of Epidemic and Pandemic Outbreaks on Healthcare Workers: Rapid Review of the Evidence.  
9 *Current Psychiatry Reports*. 2020;22:1-22.  
10 38. Sconfienza C, Lindfors P, Lantz Friedrich A, Sverke M. Social support at work and mental  
11 distress: A three-wave study of normal, reversed, and reciprocal relationships. *J Occup Health*.  
12 2019;61(1):91-100.  
13 39. Mental health and psychosocial considerations during the COVID-19 outbreak [press  
14 release]. World Health Organization 2020.  
15 40. Belfroid E, Steenbergen Jv, Timen A, Ellerbroek P, Huis A, Hulscher M. Preparedness and the  
16 importance of meeting the needs of healthcare workers: a qualitative study on Ebola. *Journal of*  
17 *Hospital Infection*. 2018;98:212-8.

Confidential

## Tables and Figures

**Table 1. Baseline characteristics of HCPs at baseline (n, 1574) and follow-up (n, 744).**

|                                   | Response                              | Baseline (n, 1574) (%) | Follow-up (n, 744) (%) |
|-----------------------------------|---------------------------------------|------------------------|------------------------|
| <b>Age</b>                        | 18-25 years                           | 76 (4.8)               | 31 (4.2)               |
|                                   | 26-35 years                           | 390 (24.8)             | 175 (23.5)             |
|                                   | 36-50 years                           | 638 (40.5)             | 298 (40.1)             |
|                                   | 51-60 years                           | 372 (23.6)             | 185 (24.9)             |
|                                   | 61-70 years                           | 92 (5.8)               | 51 (6.9)               |
|                                   | > 70 years                            | 6 (0.4)                | 4 (0.5)                |
| <b>Ethnicity</b>                  | White                                 | 1027 (65.3)            | 587 (78.9)             |
|                                   | Asian                                 | 359 (22.8)             | 93 (12.5)              |
|                                   | Black                                 | 74 (4.7)               | 27 (3.6)               |
|                                   | Mixed                                 | 48 (3.1)               | 19 (2.6)               |
|                                   | Other                                 | 39 (2.5)               | 12 (1.6)               |
|                                   | Prefer not to say                     | 27 (1.7)               | 6 (0.81)               |
| <b>Gender identity</b>            | Female                                | 1105 (70.2)            | 562 (75.5)             |
|                                   | Male                                  | 447 (28.4)             | 178 (23.9)             |
|                                   | Prefer not to say                     | 14 (0.9)               | 3 (0.4)                |
|                                   | Prefer to self-define                 | 8 (0.5)                | 1 (0.1)                |
| <b>Relationship status</b>        | Divorced                              | 54 (3.4)               | 27 (3.6)               |
|                                   | Prefer not to say                     | 46 (2.9)               | 21 (2.8)               |
|                                   | Married/Living with partner or family | 1048 (66.6)            | 496 (66.7)             |
|                                   | Other                                 | 52 (3.3)               | 22 (3.0)               |
|                                   | Single                                | 374 (23.8)             | 178 (23.9)             |
| <b>Number living in household</b> | 1                                     | 210 (13.3)             | 104 (14.0)             |
|                                   | 2                                     | 487 (30.9)             | 252 (33.9)             |
|                                   | 3-5                                   | 799 (50.8)             | 367 (49.3)             |
|                                   | 6 or more                             | 78 (5.0)               | 21 (2.8)               |
| <b>Highest level of education</b> | A-levels                              | 113 (7.2)              | 61 (8.2)               |
|                                   | Bachelor's / diploma                  | 735 (46.7)             | 346 (46.5)             |
|                                   | Master's / PhD                        | 613 (39.0)             | 290 (39.0)             |
|                                   | Other                                 | 113 (7.2)              | 47 (6.3)               |

*Note.* HCP = healthcare professional. All demographic data is self-reported. 'Asian' category includes South Asian, Chinese, and any other Asian background. 'Mixed' category includes mixed Black and White, mixed Asian and White, and mixed any other/multiple ethnic backgrounds.

**Table 2.** Separate linear regressions for the association between change in perceived level of support and change in raw mental health, burnout, and wellbeing scores in HCPs from baseline to follow-up (n, 681).

|         | Crude       |                          |         | Adjusted      |                            |           |
|---------|-------------|--------------------------|---------|---------------|----------------------------|-----------|
|         | Coefficient | 95% Confidence Intervals | P Value | Coefficient * | 95% Confidence Intervals * | P value * |
| GAD-7   | -0.10       | -0.21 to 0.01            | 0.075   | -0.13         | -0.25 to -0.01             | 0.036     |
| PHQ-9   | -0.19       | -0.30 to -0.08           | 0.001   | -0.17         | -0.29 to -0.04             | 0.008     |
| ISI     | -0.07       | -0.19 to 0.05            | 0.226   | -0.13         | -0.26 to 0.01              | 0.067     |
| EEDP2Q  | -0.05       | -0.12 to 0.01            | 0.112   | -0.06         | -0.13 to 0.02              | 0.139     |
| SWEMWBS | 0.17        | 0.08 to 0.27             | < 0.001 | 0.19          | 0.10 to 0.29               | < 0.001   |

*Note.* Crude and adjusted coefficients provided.

\*adjusted for age, gender identity, education, relationship status, number living in household, currently diagnosed mental health condition, currently diagnosed physical health condition, role (medical doctor vs. HCAs, nurses, and AHPs), and baseline level of support.

1

**Table 3. Workplace support themes based on responses from HCP only\***

| Theme                                              | Description                                                                                                                                                                                                                                                                                                   | Quotes                                                                                                                                                                                                                                                                                                                                                                                                                                                                                                                                                                                                                                        |
|----------------------------------------------------|---------------------------------------------------------------------------------------------------------------------------------------------------------------------------------------------------------------------------------------------------------------------------------------------------------------|-----------------------------------------------------------------------------------------------------------------------------------------------------------------------------------------------------------------------------------------------------------------------------------------------------------------------------------------------------------------------------------------------------------------------------------------------------------------------------------------------------------------------------------------------------------------------------------------------------------------------------------------------|
| <b>Concern/<br/>understanding<br/>for welfare</b>  | Genuine concern for welfare.                                                                                                                                                                                                                                                                                  | <i>"Direct check in. How am I doing, and actually listen to the answer. I have been left to get on with it, with a few platitudes "Ohh its hard"."</i>                                                                                                                                                                                                                                                                                                                                                                                                                                                                                        |
|                                                    | <ul style="list-style-type: none"> <li>Managers who listened and left staff feeling understood and with consistent support were valued.</li> <li>A few comments citing check-ins and appropriate training from original line-managers as being significant to their mental health when redeployed.</li> </ul> | <p><i>"Would have wanted more recognition from management about impact and repercussions of redeployment but support from colleagues was good within the team."</i></p> <p><i>"I had no contact with my original team during my redeployment, I found this very stressful which increased my anxiety."</i></p>                                                                                                                                                                                                                                                                                                                                |
|                                                    | Flexibility and understanding.                                                                                                                                                                                                                                                                                | <i>"Better understanding of peoples personal situations. I am a full-time unpaid carer for partner who was told to shield for 12 weeks. Due to his condition (a Traumatic Brain Injury and Epilepsy) I was unable to leave him unsupervised for long periods of time as his seizures are fatal and in the event of one he needs medication administered to him to save his life...I requested to be able to work from home due these extenuating circumstances which was denied which caused me and my partner extreme stress...I think it needs to be looked at as a case by case basis and not as a staffing level or need as a whole."</i> |
|                                                    | Psychological support.                                                                                                                                                                                                                                                                                        | <i>"Wellbeing support with a named psychologist allocated to our team right from the start."</i>                                                                                                                                                                                                                                                                                                                                                                                                                                                                                                                                              |
|                                                    | <ul style="list-style-type: none"> <li>One-to-one confidential counselling and/or access to clinical psychologist was cited as useful for HCPs mental health.</li> </ul>                                                                                                                                      | <i>"I would have wanted one-on-one therapy sessions with an external professional. We were offered these with our own psychology department free of charge though often work closely with these individuals."</i>                                                                                                                                                                                                                                                                                                                                                                                                                             |
| <b>Information</b>                                 | This broad theme generally describes HCPs requests for regular clear, consistent, and transparent communication/updates sent on a timely manner.                                                                                                                                                              | <i>"I found it really helpful to have daily or twice weekly staff team briefings with updates on PPE, procedures etc and a chance to ask questions. In the early part of the pandemic, one of the most stressful things was the sheer volume of information coming at us and constant changes to what we should be doing, what PPE we needed in which area etc."</i>                                                                                                                                                                                                                                                                          |
|                                                    | Participants sometimes cited daily staff briefings, regular bulletins, and daily huddles as being useful modes of communication.                                                                                                                                                                              | <i>"Better communication - it felt like as a nurse being redeployed that we were deliberately kept in the dark about operations surrounding Covid-19 as the trust management were more paranoid about details being leaked to the press than staff welfare."</i>                                                                                                                                                                                                                                                                                                                                                                              |
| <b>Tangible<br/>qualities of the<br/>workplace</b> | Adequate staffing                                                                                                                                                                                                                                                                                             | <i>"Not sure. Managing staff shortages was difficult and extra work needed. Now we have burnout from covering."</i>                                                                                                                                                                                                                                                                                                                                                                                                                                                                                                                           |
|                                                    | <ul style="list-style-type: none"> <li>Several comments describing ensuring adequate staffing in response to staff sicknesses and/or heightened workload, for example.</li> </ul>                                                                                                                             |                                                                                                                                                                                                                                                                                                                                                                                                                                                                                                                                                                                                                                               |
|                                                    | PPE/safety                                                                                                                                                                                                                                                                                                    | <i>"At the beginning of the pandemic, the PPE was rationed strictly and that caused a lot of anxiety. Those initial contacts with patient meant those staff member developed symptoms and got ill. This caused a lot of anxiety. I fortunately had annual leave for a week and when I got back to work. The PPE was fully available and in use appropriately. Scrubs were a problem especially plus sizes, not available."</i>                                                                                                                                                                                                                |
|                                                    | <ul style="list-style-type: none"> <li>Commonly reported describing training in how to use PPE, safety protocols (e.g. social distancing), regular testing, and access to appropriate PPE.</li> </ul>                                                                                                         |                                                                                                                                                                                                                                                                                                                                                                                                                                                                                                                                                                                                                                               |

|                     |                                                                                                                                                                                                                                                                                                                                                                           |                                                                                                                                                                                                                                                                                                                                                                                                                                                                                                                                                                                |
|---------------------|---------------------------------------------------------------------------------------------------------------------------------------------------------------------------------------------------------------------------------------------------------------------------------------------------------------------------------------------------------------------------|--------------------------------------------------------------------------------------------------------------------------------------------------------------------------------------------------------------------------------------------------------------------------------------------------------------------------------------------------------------------------------------------------------------------------------------------------------------------------------------------------------------------------------------------------------------------------------|
|                     | Financial support                                                                                                                                                                                                                                                                                                                                                         | <i>"Most helpful - being able to drive to and park at work. Food provided at work."</i>                                                                                                                                                                                                                                                                                                                                                                                                                                                                                        |
|                     | <ul style="list-style-type: none"> <li>E.g. free lunches, and free parking so HCPs can drive (and avoid public transport) and no additional expense.</li> </ul>                                                                                                                                                                                                           | <i>"Free meals because there was no food in the shops and also I was so tired after my shift, I couldn't cook. Not having to wash my uniform. I know my manager was doing her best to keep the unit staffed and as safe as possible."</i>                                                                                                                                                                                                                                                                                                                                      |
|                     | Work from home support                                                                                                                                                                                                                                                                                                                                                    | <i>"Not to have to pay back hours lost trying to work from home without necessary equipment needed to enable me to work from home effectively. Necessary equipment should have been provided."</i>                                                                                                                                                                                                                                                                                                                                                                             |
|                     | <ul style="list-style-type: none"> <li>Few HCPs described support (in terms of IT equipment, software support to facilitate working from home as being significant.</li> </ul>                                                                                                                                                                                            |                                                                                                                                                                                                                                                                                                                                                                                                                                                                                                                                                                                |
| <b>Leadership</b>   | Visibility                                                                                                                                                                                                                                                                                                                                                                | <i>"Felt top senior management/directors were not visible during the peak and now- highlighting a big disconnect between the realities of working on the shop floor and those making the decisions."</i>                                                                                                                                                                                                                                                                                                                                                                       |
|                     | <ul style="list-style-type: none"> <li>Staff felt there was a lack of senior managerial presence "on the ground", resulting in patient-facing staff feeling uncared for, disconnected with decision makers and that they lacked genuine understanding of the difficulties experienced.</li> </ul>                                                                         |                                                                                                                                                                                                                                                                                                                                                                                                                                                                                                                                                                                |
|                     | Available/approachable                                                                                                                                                                                                                                                                                                                                                    | <i>"Most helpful was having a manager who was always available and actively trying to improve the situation for us all, thinking of things to change before it needed changing etc. Very grateful."</i>                                                                                                                                                                                                                                                                                                                                                                        |
|                     | <ul style="list-style-type: none"> <li>Few brief comments expressing gratitude for their managers/supervisors being approachable.</li> <li>Few comments relating to being glad that supervisors were available to help, or the availability of wellbeing support services.</li> </ul>                                                                                     |                                                                                                                                                                                                                                                                                                                                                                                                                                                                                                                                                                                |
|                     | Reassurance                                                                                                                                                                                                                                                                                                                                                               | <i>"I work in intensive care. We were told "to keep patients alive and anything you do extra is a bonus". This was very comforting to me as I know I will always do my best and more to reach on everything but was this statement by our matron made me feel I could do my job to the best of my ability and not live with the guilt that I hadn't reached on certain things."</i>                                                                                                                                                                                            |
|                     | <ul style="list-style-type: none"> <li>Few comments highlight the significance of receiving reassurance from their managers regarding tasks and patient care, and reassurance regarding redeployment or job security.</li> </ul>                                                                                                                                          |                                                                                                                                                                                                                                                                                                                                                                                                                                                                                                                                                                                |
|                     | Higher support for managers                                                                                                                                                                                                                                                                                                                                               | <i>"I am a partner &amp; senior manager. At the height of the crisis there was no one to take to about it. I and the other partners were constantly having to support the staff team. But there was no one for us to go to."</i>                                                                                                                                                                                                                                                                                                                                               |
|                     | <ul style="list-style-type: none"> <li>Some participants who were managers themselves felt there was no-one to manage or support them.</li> </ul>                                                                                                                                                                                                                         |                                                                                                                                                                                                                                                                                                                                                                                                                                                                                                                                                                                |
| <b>Peer support</b> | Peer support was frequently stated. This was usually described as helpful and comprised a sense of camaraderie, solidarity/unity, and being open with each other. Some participants appreciated eating lunch together with team and to have informal discussions regarding emotional support. More formal modes of discussion described Balint groups, in a couple cases. | <i>"We are a team of 12 working in a "bubble". At the height of the pandemic we split into two teams and working alternate weeks. increased workload and very stressful but we all supported each other and ensured we were all coping!"</i><br><br><i>"Mealtimes were really important. Meals were free and my manager ensured we all went together and ate lunch together. This seemed to brighten the day and we tried not to talk about work at lunch time. For other team members, she also requested they go back to the office before home time to have a debrief."</i> |

\*N = 860.

1 **Figure 1.** Flowchart for baseline and follow-up participants.

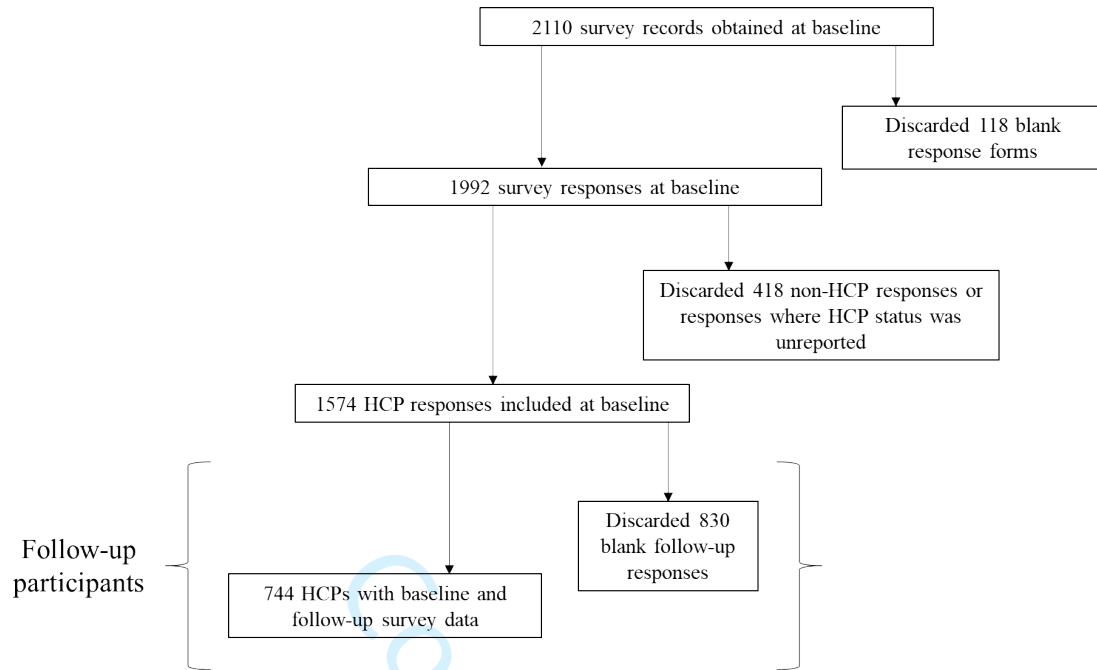

2  
3  
4  
5  
6

1 **Figure 2.** Forest plot displaying the odds ratio (risk) of various mental health and burnout outcomes by  
 2 perceived level of workplace support amongst HCPs at baseline (n, 1422).

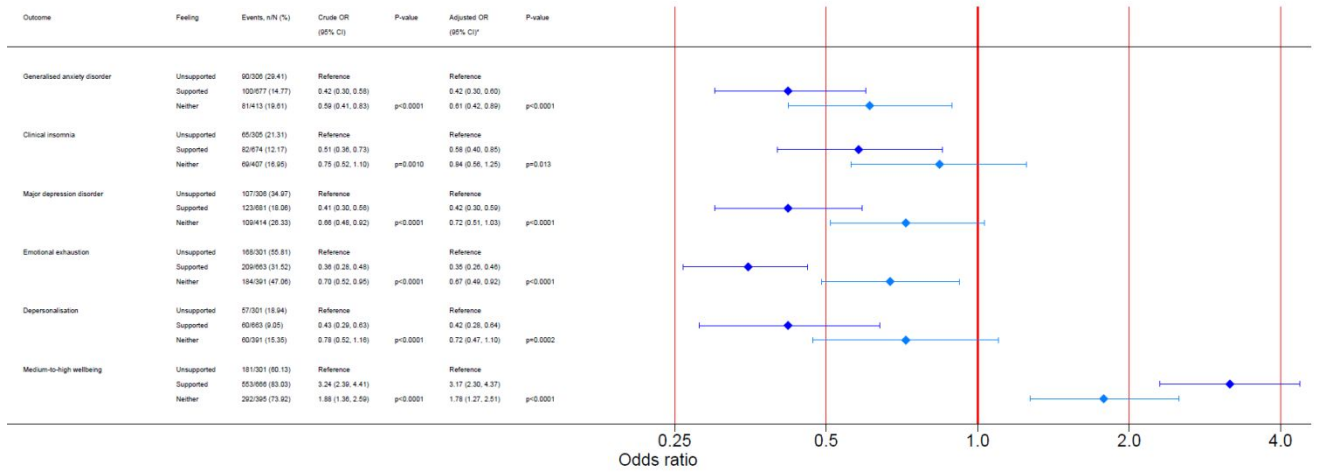

3  
 4 *Note.* Adjusted for age, gender, time elapsed since COVID-19 peak in subject’s region, highest level of  
 5 education, relationship status, number living in household, current mental health diagnosis, current physical  
 6 health diagnosis, and role. P values are for global trend relating support to each outcome.

8 **Figure 3.** Forest plot displaying the odds ratio (risk) of various mental health and burnout outcomes by  
 9 perceived level of workplace support amongst HCPs at follow-up (n, 681).

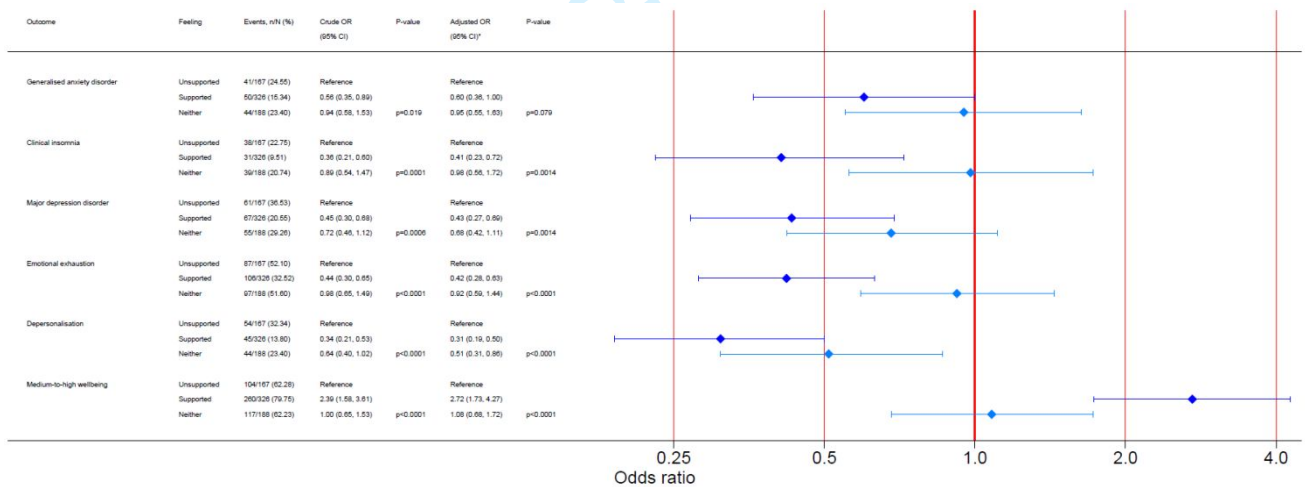

10 *Note.* Adjusted for age, gender, time elapsed since COVID-19 peak in subject’s region, highest level of  
 11 education, relationship status, number living in household, current mental health diagnosis, current physical  
 12 health diagnosis, and role. P values are for global trend relating change in level of support to mean scores on  
 13 each outcome.



1  
2  
3 **1 Title**

4  
5  
6 2 The **relationship between the level of (and changes in)** perceived workplace support and mental  
7  
8 3 health, wellbeing and burnout in healthcare professionals (HCP) during the COVID-19  
9  
10 4 pandemic: insight and mitigating strategies from the CoPE-HCP cohort study.

11 **5 Authors**

12  
13  
14 6 Imrana Siddiqui\*<sup>1,2,3</sup> MBBS (joint first author), Jaya Gupta\*<sup>4</sup> MRCPsych (joint first author),  
15  
16 7 Iris McIntosh<sup>5</sup> MRCPsych, Christina Komodromos<sup>6</sup> BSc, Thomas Godec<sup>7</sup> PhD, George  
17  
18 8 Collett<sup>7</sup> PhD, Sher Ng<sup>8</sup> MB BChir, Carmela Maniero<sup>7,8,9</sup> PhD, Sotiris Antoniou<sup>8</sup> MRPharmS,  
19  
20 9 Rehan Khan<sup>9</sup> MRCOG, Vikas Kapil<sup>7,8,9</sup> PhD, Mohammed Y. Khanji<sup>7,8,10</sup> MRCP, and Ajay K.  
21  
22 10 Gupta<sup>7,8,9,11\*\*</sup> PhD, on behalf of COPE-HCP clinical investigators\*\*\*.

23 **11 Affiliations**

24  
25 12 <sup>1</sup>Wellbeing Hub, Newham Training Hub, London, United Kingdom.

26  
27 13 <sup>2</sup>NHS NorthEast London CCG, London, United Kingdom.

28  
29 14 <sup>3</sup>Woodgrange Medical Practice, London, United Kingdom.

30  
31 15 <sup>4</sup>South West London and St George's Mental Health NHS Trust, London, United Kingdom.

32  
33 16 <sup>5</sup>Camden & Islington Foundation Trust, London, United Kingdom.

34  
35 17 <sup>6</sup>Barnet, Enfield and Haringey Mental Health NHS Trust, London, United Kingdom.

36  
37 18 <sup>7</sup>William Harvey Research Institute, Queen Mary University of London, London, United  
38  
39 19 Kingdom.

40  
41 20 <sup>8</sup>Barts Heart Centre, St. Bartholomew's Hospital, Barts Health NHS Trust, London, United  
42  
43 21 Kingdom.

44  
45 22 <sup>9</sup>The Royal London Hospital, Barts Health NHS Trust, United Kingdom.

46  
47 23 <sup>10</sup>. Newham University Hospital, Barts Health NHS Trust, London, United Kingdom.

48  
49 24 <sup>11</sup>National Heart and Lung Institute, Imperial College London, London, United Kingdom.

50  
51  
52  
53  
54  
55 25

56  
57 26 \*Joint first authors (contributed equally to this manuscript).

1  
2  
3  
4  
5  
6  
7  
8  
9  
10  
11  
12  
13  
14  
15  
16  
17  
18  
19  
20  
21  
22  
23  
24  
25  
26  
27  
28  
29  
30  
31  
32  
33  
34  
35  
36  
37  
38  
39  
40  
41  
42  
43  
44  
45  
46  
47  
48  
49  
50  
51  
52  
53  
54  
55  
56  
57  
58  
59  
60

1   \*\*Corresponding and senior author: Ajay K. Gupta, William Harvey Research Institute, Queen  
2   Mary University London, London, United Kingdom. [ajay.gupta@qmul.ac.uk](mailto:ajay.gupta@qmul.ac.uk)

3   The corresponding author attests that all listed authors meet authorship criteria and that no  
4   others meeting the criteria have been omitted.

5   \*\*\*See supplementary document for COPE-HCP Clinical Investigators names and affiliations.

6   **Funding Statement**

7   Barts Charity. The funders had no role in the study design, data collection, data analysis, data  
8   interpretation, or writing of the report.

9   **Word count:** 3115

Confidential

## Abstract

### Background

COVID-19 pandemic is associated with psychological impact amongst healthcare professionals (HCPs). However, little is known about the relationship between workplace support (WS) and mental health and burnout amongst HCPs, and the effective strategies mitigating this impact.

### Methods

In the CoPE-HCP cohort study, online surveys were distributed at baseline (July-September 2020), and at follow-up (~four months later) assessing the presence of generalized anxiety disorder (GAD), clinical insomnia, major depressive disorder (MDD), burnout (emotional exhaustion and depersonalization), and wellbeing. Both surveys assessed self-reported level of WS. For baseline and follow-up, independently, separate logistic regression models relating the level of WS to mental health and burnout were developed after adjusting for a priori confounders. Linear regression models were also developed relating the change in the perceived level of WS with the change in mental health scores from baseline and follow-up. Thematic analyses on baseline survey free-text entries were done to evaluate what constitutes effective support.

### Findings

At baseline ( $n = 1422$ ) and follow-up ( $n = 681$ ), consistently, compared to those who felt unsupported, those who felt supported had reduced risk (odds) of GAD (baseline: 58% [95% CI of OR, 0.30-0.60], follow-up: 40% [0.36-1.00]), clinical insomnia (42% [0.40-0.85], 59% [0.23-0.72]), MDD (58% [0.30-0.59], 57% [0.27-0.69]), emotional exhaustion (65% [0.26-0.46], 58% [0.28-0.63]) and depersonalization (58% [0.28-0.61], 69% [0.19-0.50]).

In the cohort of those who responded to both surveys, the improvement in perceived level of WS from baseline was associated with significantly improved GAD-7 (adjusted difference. -0.13 [-0.25, -0.01]), PHQ-9 (-0.17 [-0.29, -0.04]), and SWEMWBS (wellbeing) (0.19 [0.10, 0.29]) scores, independent of baseline level of support.

1  
2  
3  
4  
5  
6  
7  
8  
9  
10  
11  
12  
13  
14  
15  
16  
17  
18  
19  
20  
21  
22  
23  
24  
25  
26  
27  
28  
29  
30  
31  
32  
33  
34  
35  
36  
37  
38  
39  
40  
41  
42  
43  
44  
45  
46  
47  
48  
49  
50  
51  
52  
53  
54  
55  
56  
57  
58  
59  
60

1 We identified five themes constituting effective workplace support: 1) concern/understanding  
2 for welfare, 2) information, 3) tangible qualities of the workplace, 4) leadership, and 5) peer  
3 support.

4 **Interpretation**

5 These findings highlight nuanced associations between perceived level of (and changes in) WS  
6 and mental health and burnout of HCPs, and identifies potential strategies constituting effective  
7 workplace support.

8 **Trial registration**

9 Clinicaltrials.gov (NCT04433260).

10

Confidential

## 1 Introduction

2 The coronavirus (COVID-19) pandemic has posed a significant peril to both the physical and  
3 mental health of the general population. In particular, the significant toll on healthcare  
4 professionals (HCPs) is a critical issue that, if not addressed, will impact staffing and service  
5 provisions in the future.<sup>(1, 2)</sup> The potential increased vulnerability to mental health issues  
6 amongst HCPs could be explained by the unique challenges faced by them, including vicarious  
7 trauma,<sup>(3)</sup> moral injury,<sup>(4-7)</sup> and substantially increased risk of infection.<sup>(8)</sup> Long working hours,  
8 discrimination for working in hospitals, and workplace practices may also contribute to the  
9 psychological impact.<sup>(9)</sup> Indeed, recent meta-analyses and studies have attested to this  
10 considerable toll, with reported prevalence rates of anxiety (26.1%),<sup>(10)</sup> depression (24%),<sup>(11)</sup>  
11 and burn-out (49.4%)<sup>(12)</sup> among HCPs during the pandemic. As such, high quality research  
12 identifying the factors associated with improved mental health outcomes in HCPs, and likely  
13 strategies to mitigate them, is an urgent need.<sup>(2)</sup>

14 Workplace support is one potential strategy. Relating to previous severe acute respiratory  
15 syndrome (SARS) outbreaks, *Brooks et al.* recommend the critical role of managers/employers  
16 in ensuring clear communication, supportive environments, specialised training, and support  
17 systems to promote psychological wellbeing.<sup>(13)</sup> Concerningly, a cross-sectional survey during  
18 the first wave of the COVID-19 pandemic (data collected from 30<sup>th</sup> March 2020 to 5<sup>th</sup> May  
19 2020) found that most respondents (UK HCPs) felt there was inadequate wellbeing support.<sup>(14)</sup>  
20 The study, along with other small qualitative studies, also highlight the perceived value of  
21 organisational support to the mental health in HCPs.<sup>(14-19)</sup> Some cross-sectional quantitative  
22 studies support an association between workplace support and mental health in HCPs<sup>(20-24)</sup> and  
23 suggesting workplace support to mitigate the psychological burden in HCPs. However, these  
24 studies have limitations: most are cross-sectional,<sup>(20-25)</sup> some are small<sup>(21, 25)</sup> or offer a non-  
25 comprehensive assessment of mental health (and neglect issues such as burnout),<sup>(20, 22)</sup> or only  
26 focus on qualitative or quantitative aspects of support.<sup>(15, 16, 20-25)</sup> Therefore, to inform national  
27 and global policy and workplace practices, we require robust high-quality studies using  
28 comprehensive mental health assessments demonstrating improvements in mental health over  
29 time.<sup>(26)</sup>

30 Addressing this, the current study (part of the COVID-19 and Physical and Emotional  
31 Wellbeing of Healthcare Professionals project; CoPE-HCP)<sup>(27)</sup> examined the relationship  
32 between perceived level of workplace support and mental health outcomes: generalized anxiety

1  
2  
3 1 disorder, clinical insomnia, major depressive disorder, burnout (emotional exhaustion and  
4 2 depersonalization), and wellbeing twice during the pandemic (approximately four months  
5 3 apart). We also examined whether changes in perceived level of workplace support was  
6 4 associated with improved mental health and wellbeing outcomes over the four-month period.  
7 5 Finally, we explored what workplace support HCPs want or have found helpful.  
8  
9

## 10 6 **Methods**

11 7 The protocol for this cohort study is published.<sup>(27)</sup> The study was approved by the Cambridge  
12 8 East Research Ethics Committee (20/EE/0166), and registered in ClinicalTrials.gov  
13 9 (NCT04433260).

14 10 The study involved a series of online surveys distributed to HCPs (in the UK and  
15 11 internationally). The inclusion criteria for the study were: 1) aged 18 or older, 2) electronic  
16 12 consent given, and 3) self-identified as HCP staff. Recruitment was facilitated by health service  
17 13 employers who invited employees by email containing a link to the survey, and the participants  
18 14 were those who responded to that invite.

19 15 Initial consent was gained for the baseline survey, and at the end of the baseline survey,  
20 16 participants were then asked for their consent to receive any follow-up surveys. Further consent  
21 17 was gained at the follow-up survey.

22 18 The baseline survey was conducted between July and September 2020. In the UK, this  
23 19 corresponded to the trough of the first wave of COVID-19. The baseline survey gathered  
24 20 information such as age, gender, ethnicity, relationship status, educational attainment, and  
25 21 current mental health and physical health diagnosis (a multiple-choice closed-ended item).

26 22 Our primary predictor, workplace support, was assessed by asking participants “Do you think  
27 23 you received adequate support directly from your supervisors/line managers/direct employers?  
28 24 (Mark on scale, with 1 -as no support and 10 as full and professional support)”. This was  
29 25 converted to a 3-level response with scores of 1-3, 4-6, and 7-10 being labelled as ‘felt  
30 26 unsupported’, ‘neither felt supported nor unsupported’, and ‘felt supported’ respectively. ‘Felt  
31 27 unsupported’ served as the reference group in the analysis. A subsequent free-text item was  
32 28 included eliciting qualitative data about what support they found most helpful or felt would be  
33 29 helpful, to supplement perceptions of workplace support.

34 30 *Outcome ascertainment*

1 At each survey, we assessed for the presence of generalized anxiety disorder (using the 7-item  
2 Generalized Anxiety Disorder [GAD-7]),<sup>(28)</sup> clinical insomnia (using 7-item Insomnia Severity  
3 Index [ISI]),<sup>(29)</sup> major depressive disorder (using 9-item Patient Health Questionnaire [PHQ-  
4 9]),<sup>(30)</sup> burnout domains: emotional exhaustion and depersonalization (using single respective  
5 7-point scale items)<sup>(32)</sup>, and wellbeing (using the Short Warwick-Edinburgh Mental Wellbeing  
6 Score [SWEMWBS]).<sup>(31)</sup>

7 The follow-up survey (approximately four months after baseline during the second peak of the  
8 pandemic) included the same mental health assessments and the same item assessing level of  
9 workplace support (excluding free-text item). For transparency, due to survey error, the support  
10 item at follow-up provided a score between 0 and 100 (as opposed to 0-10 at baseline survey)  
11 which was similarly collapsed to a 3-level response: 0-30, 31-69, and 70-100 being labelled as  
12 ‘felt unsupported’, ‘neither felt supported nor unsupported’, and ‘felt supported’, respectively.

### 13 *Statistical analysis*

14 Statistical analyses were conducted using STATA v17.0. **Baseline characteristics were  
15 compared between those who responded to the follow-up survey and are part of HCP cohort,  
16 and those who only responded to first survey and constitute the findings from baseline cross-  
17 sectional analysis.**

18 At each survey time point, we separately assessed for the cross-sectional association between  
19 the perceived level of support and the presence of outcomes: generalized anxiety disorder,  
20 clinical insomnia, major depressive disorder, below average wellbeing, emotional exhaustion,  
21 and depersonalization, in accordance with validated cut-offs of respective tools. Logistic  
22 regression models were developed to estimate crude and adjusted odds ratios (with 95%  
23 confidence intervals, and p-values) in each perceived support group as compared to the  
24 reference group (perceived unsupported). The multivariable models were adjusted for pre-  
25 specified risk factors: age, gender, time since COVID-19 peak in the participant’s region,  
26 highest level of education, relationship status, number of people living in their household,  
27 currently diagnosed mental health condition (yes/no), currently diagnosed physical health  
28 condition (yes/no), **and HCP role (medical doctors [reference group] vs. healthcare assistants,  
29 nurses and midwives, and AHPs).**

30 **For cohort analysis, i.e. those who responded to both baseline and follow-up surveys, the  
31 change in mental health and burnout symptoms was calculated by subtracting the baseline raw  
32 score from the follow-up score (follow-up score was rescaled by dividing by 10) on the**





1 of 722 HCPs), major depressive disorder (28.0% of 724 HCPs), emotional exhaustion (43.2%  
2 of 717 HCPs), and depersonalization (21.2% of 717 HCPs).

### 3 *Baseline group and cohort population of HCPs*

4 The baseline characteristics of those who only responded to the baseline survey (n = 1574)  
5 were mostly similar to those who responded to both surveys (n = 744), except for significant  
6 differences in self-defined ethnicity, gender identity and number of people living in the  
7 household (Table 1; Supplemental Table 1). Baseline-only responding participants had  
8 relatively higher proportions of self-assigned Asian ethnicity and male gender and belonged to  
9 the bigger household (Supplemental Table 1). Mental health outcomes were not significantly  
10 different between those who only responded to the baseline survey and those who responded  
11 to both surveys according to chi squared analysis (Supplemental Table 1).

### 12 *Perceived level of support at baseline and follow-up*

13 In independent cross-sectional assessments, 1422 participants provided valid data on perceived  
14 level of support at baseline and 681 of them provided similar data at follow-up too. As per our  
15 pre-defined 3-level categories (based on the Likert scales) measuring perceived support, 48.5%  
16 of the 1422 HCPs at baseline reported feeling supported with similar proportions observed in  
17 the follow-up sample (47.9% of 681 HCPs), whilst 21.9% of the baseline sample felt  
18 unsupported with 24.5% of the follow-up sample felt unsupported (Supplementary Table 2; see  
19 Supplementary Figure 1-3 for percentage distribution of responses for baseline and follow-up  
20 perceived level of support, and for the change in perceived support from baseline to follow-  
21 up).

### 22 *Relationship between support and mental health and burnout outcomes*

23 At baseline (Figure 2), there was a statistically significant relationship between level of support  
24 and each mental health and burnout outcome ( $p$  for trends were all  $<0.01$  except for clinical  
25 insomnia  $p = .013$ ). Compared with those who felt unsupported, respondents who felt supported  
26 were significantly less likely to meet the criteria for generalized anxiety disorder (adj. odds  
27 ratio 0.42, 95% CI 0.30 to 0.60), clinical insomnia (0.58, 0.40 to 0.85), major depressive  
28 disorder (0.42, 0.30 to 0.59), emotional exhaustion (0.35, 0.26 to 0.46), and depersonalisation  
29 (0.43, 0.28 to 0.64). On the SWEMWBS wellbeing measure, those who felt supported were  
30 significantly more likely to have medium or high wellbeing (3.17, 2.30 to 4.37).

1  
2  
3 1 Based on 681 valid responses at follow-up (Figure 3; median 4.9 months after baseline survey),  
4 2 compared to those who felt unsupported, those who felt supported were significantly less likely  
5 3 to meet the criteria for clinical insomnia (0.34, 0.20 to 0.58), major depressive disorder (0.46,  
6 4 0.30 to 0.70), emotional exhaustion (0.39, 0.27 to 0.58), and depersonalisation (0.32, 0.20 to  
7 5 0.51). Similarly, on the SWEMWBS wellbeing measure, those who felt supported were more  
8 6 likely to have medium or high wellbeing (2.72, 1.73 to 4.27). Borderline significance was met  
9 7 for generalized anxiety disorder (0.60, 0.36 to 1.00) when comparing perceived supported to  
10 8 perceived unsupported HCPs.

### 9 *Change in level of workplace support and improvement in mental health outcomes over time*

10 **In the cohort of participants with data at both baseline and follow-up (n = 681), there was a**  
11 **consistent association between the change in perceived level of support and the change in**  
12 **scores on some, but not all, mental health outcomes (Table 2). Separate adjusted linear**  
13 **regression models showed that a whole unit increase in change in perceived level of support**  
14 **was inversely associated with the change in GAD-7 anxiety scores (coefficient -0.13 [-0.25 to**  
15 **-0.01]  $p = .04$ ), PHQ-9 depression scores (-0.17 [-0.29 to -0.04]  $p < 0.01$ ), and positively**  
16 **associated with the change in SWEMWBS wellbeing scores (0.19 [0.10 to 0.29]  $p < 0.001$ ).**  
17 **No significant associations were observed between change in perceived level of support and**  
18 **the change in ISI insomnia ( $p = 0.067$ ) or EEDP2Q burnout scores ( $p = 0.139$ ).**

### 19 *Themes: what constitutes effective support*

20 **860 free-text entries were included in the thematic analysis to illustrate what qualities/aspects**  
21 **of workplace support are perceived as most helpful. We identified 5 overarching themes**  
22 **describing: 1) concern or recognition regarding welfare, 2) information, 3) tangible qualities of**  
23 **the workplace, 4) leadership, and 5) peer support (see Table 3 for full details and exemplar**  
24 **quotes).**

### 25 **Interpretation**

26 This large cohort study demonstrates that, during the COVID-19 pandemic, HCPs who felt  
27 supported at baseline (compared with those who felt unsupported) had a significantly lower  
28 risk (odds) of generalized anxiety disorder, clinical insomnia, major depressive disorder,  
29 emotional exhaustion, depersonalization, and below-average wellbeing. This association was  
30 also observed at follow-up (albeit borderline significance for generalized anxiety disorder),  
31 more than four months after baseline, demonstrating consistency and reliability in these

1 findings. Importantly, to our knowledge, this is the first study to report associations between  
2 changes in perceived level of workplace support and changes in mental health symptoms in  
3 HCPs over time during the pandemic: improvement in perceived support was significantly  
4 associated with improved scores on measures of generalized anxiety disorder, major depressive  
5 disorder, and wellbeing (independent of baseline perceived level of support), but not for  
6 insomnia or burnout. Furthermore, a unique aspect of this study is the rich qualitative data  
7 illustrating what qualities of workplace support are perceived by HCPs to be helpful during the  
8 pandemic. This inclusion of qualitative data can inform the design of intervention studies to  
9 establish a causal relationship between workplace support and mental health.

10 This study builds on and validates the hypothesis generated by a few recent cross-sectional  
11 studies showing associations between workplace support and mental health outcomes in HCPs  
12 during the current pandemic,<sup>(21, 22, 36)</sup> and previous outbreaks.<sup>(37)</sup> While a small cohort study in  
13 routine work environment has shown that level of co-worker and managerial support is  
14 inversely associated with general mental distress,<sup>(38)</sup> we have not found any studies – in routine  
15 or pandemic settings - that have evaluated the prospective relationship between perceived  
16 improved workplace support and changes in mental health, wellbeing, and burnout.

17 Most policy and guidance suggest a benefit of improving workplace support on general mental  
18 health, and indeed our findings support this notion regarding depression, anxiety, and wellbeing  
19 in HCPs. However, whilst we observe a trend between change in perceived level of support  
20 and insomnia and burnout scores over time, these associations were non-significant. This  
21 highlights the relevance of improvements in perceived workplace support to distinct mental  
22 health issues, and we speculate that other workplace factors which are not accounted for in this  
23 analysis (e.g. long working hours) are more likely to impact on burnout and insomnia.

24 Regarding our qualitative findings, these are consistent with previous workplace guidance for  
25 healthcare systems. The WHO has advised how HCPs and their managers can promote their  
26 psychosocial wellbeing during the COVID-19 pandemic: taking care of basic needs, ensuring  
27 staff communication is up-to-date and of high quality, use of buddy systems, psychological  
28 first aid, and ensuring staff access to mental health support services.<sup>(39)</sup> Our findings also mirror  
29 previous reviews stating that clear communication through horizontal (peer-peer) and vertical  
30 (managers/trusts-employees) networks can buffer against the psychological impact.<sup>(26)</sup> Many  
31 participants also reported daily updates being useful as a means of support. In the UK, Enabling  
32 Quality Improvement in Practice encourages embedding daily huddles into work practice with

1  
2  
3 1 the goal of safety and improvement - we suggest these daily huddles should include a wellbeing  
4  
5 2 'check-in' element.  
6

7  
8 3 Intrinsic to workplace support is the support for managers themselves which was reflected by  
9  
10 4 a few comments in our qualitative data. Previous qualitative work highlighted how managerial  
11  
12 5 support was integral to more positive workplace experience during the Ebola epidemic, but  
13  
14 6 also managerial stress was reflected onto the HCPs.<sup>(40)</sup> Therefore, we must consider the  
15  
16 7 potential impact of managerial mental health on the quality of support delivered to employees,  
17  
18 8 which was not explicitly examined in our survey.

19  
20 9 There are some limitations to this study. First, the data was collected between July and  
21  
22 10 December 2020, at the trough and second peak of the UK COVID-19 pandemic, respectively.  
23  
24 11 Despite the pandemic still ongoing, our findings remain highly relevant due to the fluctuating  
25  
26 12 levels of cases and persistent mental health burden in HCPs. Secondly, while we account for  
27  
28 13 the time since COVID-19 peak in participants' region, non-UK participants may have  
29  
30 14 experienced varying public health policies which may be a confounder. **Third, there is potential**  
31  
32 15 **selection bias because our survey was accessible online only, and the respondents may not be**  
33  
34 16 **representative of all HCPs (those with self-identified female gender and white ethnicity were**  
35  
36 17 **more likely to respond to the follow-up survey).** However, our observed rates of mental health  
37  
38 18 outcomes are similar to other large surveys in the UK general population,<sup>(34)</sup> and **no significant**  
39  
40 19 **differences were observed for mental health between baseline-only and follow-up (cohort)**  
41  
42 20 **participants,** therefore we anticipate our cohort findings to be generalisable to the healthcare  
43  
44 21 workforce regardless of possible self-selection bias. **Fourth, the issue of bidirectionality**  
45  
46 22 **remains relevant despite reporting data at two time points: HCPs with lower mental health may**  
47  
48 23 **perceive workplace support to be lower because their needs are greater. Despite this, we believe**  
49  
50 24 **that participants primarily rate their level of support based on their observations of the available**  
51  
52 25 **support strategies in the workplace.** Finally, most free text responses were generated from a  
53  
54 26 double-barrelled question asking what support was useful and what was desired. This does not  
55  
56 27 invalidate the themes but we are unable to concretely distinguish between what support was  
57  
58 28 helpful and what was lacking.

59  
60 29 In conclusion, we demonstrate a consistent association between perceived level of workplace  
61  
62 30 support and the mental health and wellbeing of HCPs during the pandemic. Improved perceived  
63  
64 31 workplace support was associated with improved scores on anxiety, depression, and wellbeing  
65  
66 32 measures over time but was not associated with insomnia or burnout. Further studies are

1 required to understand the workplace factors associated with insomnia and burnout in HCPs  
 2 during the pandemic, and to understand the causal relationship between perceived workplace  
 3 support and mental health in HCPs. Our findings are likely to inform significant changes in  
 4 guidance and national policies targeted at improving wellbeing in HCPs during the current and  
 5 future pandemics.

#### 6 **Declaration of interests:**

7 AKG (chief investigator and corresponding author) declares that CoPE-HCP study received  
 8 part funding from Barts Charity, and declares no other conflict of interest.

#### 9 **Authors contributions:**

10 AKG is the chief investigator and corresponding author for this study had access to all of the  
 11 data in the study and takes full responsibility for the integrity of the data and the accuracy of  
 12 the data analysis. Below are the detailed author contributions

13 Conceptualization: AKG, VK, MYK, JG, IS, CM, SN

14 Data curation: AKG, TG, GC

15 Formal analysis: AKG, TG, JG, IS, IM, CK, GC

16 Funding acquisition: AKG, VK

17 Resources and software: AKG, TG

18 Supervision: AKG

19 Investigation: *all authors and investigators*

20 Methodology: AKG, VK, MYK, JG, IS, CM, SN, RK, SA

21 Project administration: AKG, GC

22 Writing original draft: IS, JG, AKG, IM, CK, TG, GC

23 Writing-review and editing: *all authors and investigators*

#### 24 **Funding**

25 Barts Charity.

#### 26 ***Role of funding source***

1  
2  
3 1 The funders had no role in the study design, data collection, data analysis, data interpretation,  
4 2 or writing of the report.

7 3 ***Patient and public involvement***

9 4 No patients or members of the public were directly involved with the design, or conduct, or  
11 5 reporting, or dissemination plans of the research.

14 6 **Data sharing statement**

16 7 Anonymised data, data dictionary, and survey materials will be made available upon request.  
18 8 Study protocol is available at <https://doi.org/10.3389/fpsyg.2021.616280>.

21 9 **Acknowledgements:**

23 10 We would like to acknowledge the extensive support received from the Barts Education  
24 11 Academy and William Harvey Research Institute for sharing some of their resources needed  
26 12 to conduct this study. In particular, we wish to acknowledge the excellent contribution of the  
28 13 following: Julekha Khanam from Barts Health NHS Trust, Elaine Colaco and Martyn Clark  
29 14 from Barts Education Academy, Tania Toma from Imperial College Healthcare NHS Trust,  
31 15 and Ade Alele, Professor Mark Caulfield, and Amrita Ahluwalia from William Harvey  
33 16 Research Institute.

36 17 **Transparency declaration:**

38 18 AKG (the manuscript's guarantor) affirms that the manuscript is an honest, accurate, and  
39 19 transparent account of the study being reported; that no important aspects of the study have  
41 20 been omitted; and that any discrepancies from the study as planned (and, if relevant,  
43 21 registered) have been explained.

## References

1. Stuijzand S, Deforges C, Sandoz V, Sajin C-T, Jaques C, Elmers J, et al. Psychological impact of an epidemic/pandemic on the mental health of healthcare professionals: a rapid review. *BMC Public Health*. 2020;20:1-18.
2. Holmes EA, O'Connor RC, Perry VH, Tracey I, Wessely S, Arseneault L, et al. Multidisciplinary research priorities for the COVID-19 pandemic: a call for action for mental health science. *Lancet Psychiatry*. 2020;7(6):547-60.
3. Li Z, Ge J, Yang M, Feng J, Qiao M, Jiang R, et al. Vicarious traumatization in the general public, members, and non-members of medical teams aiding in COVID-19 control. *Brain Behav Immun*. 2020;88:916-9.
4. Wang Z, Harold KG, Tong Y, Wen J, Sui M, Liu H, et al. Moral injury in Chinese health professionals during the COVID-19 pandemic. *Psychological Trauma: Theory, Research, Practice, and Policy*. 2021;Advance on.
5. Zerach G, Levi-Belz Y. Moral injury and mental health outcomes among Israeli health and social care workers during the COVID-19 pandemic: a latent class analysis approach. *European journal of psychotraumatology*. 2021;12.
6. Lamb D, Gnanapragasam S, Greenberg N, Bhundia R, Carr E, Hotopf M, et al. Psychosocial impact of the COVID-19 pandemic on 4378 UK healthcare workers and ancillary staff: initial baseline data from a cohort study collected during the first wave of the pandemic. *Occupational and Environmental Medicine*. 2021;0:1-8.
7. Plouffe RA, Nazarov A, Forchuk CA, Gargala D, Deda E, Le T, et al. Impacts of morally distressing experiences on the mental health of Canadian health care workers during the COVID-19 pandemic. *Eur J Psychotraumatol*. 2021;12(1):1984667.
8. Shanafelt T, Ripp J, Trockel M. Understanding and Addressing Sources of Anxiety Among Health Care Professionals During the COVID-19 Pandemic. *JAMA*. 2020;323:2133-4.
9. Yang Y, Lu L, Chen T, Ye S, Kelifa MO, Cao N, et al. Healthcare Worker's Mental Health and Their Associated Predictors During the Epidemic Peak of COVID-19. *Psychol Res Behav Manag*. 2021;14:221-31.
10. Raoofi S, Kan FP, Rafiei S, Khani S, Hosseini Fard H, Tajik F, et al. Anxiety during the COVID-19 pandemic in hospital staff: systematic review plus meta-analysis. *BMJ Supportive & Palliative Care*. 2021;0:1-9.
11. Olaya B, Pérez-Moreno M, Bueno-Notivol J, Gracia-García P, Lasheras I, Santabárbara J. Prevalence of Depression among Healthcare Workers during the COVID-19 Outbreak: A Systematic Review and Meta-Analysis. *Journal of Clinical Medicine*. 2021;10:3406.
12. Prasad K, McLoughlin C, Stillman M, Poplau S, Goelz E, Taylor S, et al. Prevalence and correlates of stress and burnout among U.S. healthcare workers during the COVID-19 pandemic: A national cross-sectional survey study. *EClinicalMedicine*. 2021;35.
13. Brooks SK, Dunn R, Amlôt R, Rubin GJ, Greenberg N. A Systematic, Thematic Review of Social and Occupational Factors Associated with Psychological Outcomes in Healthcare Employees during an Infectious Disease Outbreak. *Journal of Occupational and Environmental Medicine*. 2018;60:248-57.
14. Siddiqui I, Aurelio M, Gupta A, Blythe J, Khanji M. COVID-19: Causes of anxiety and wellbeing support needs of healthcare professionals in the UK: A cross-sectional survey. *Clinical Medicine*. 2021;21:66-72.
15. Billings J, Seif NA, Hegarty S, Ondruskova T, Soulios E, Bloomfield M, et al. What support do frontline workers want? A qualitative study of health and social care workers' experiences and views of psychosocial support during the COVID-19 pandemic. *PLoS ONE*. 2021;16:e0256454.
16. Kang B-A, Kwon S, You M, Lee H. Perceived sources of occupational burn-out and embitterment among front-line health workers for COVID-19 control in Gyeonggi province, South Korea: a qualitative study. *Occupational and Environmental Medicine*. 2021;0:1-8.

1  
2  
3  
4  
5  
6  
7  
8  
9  
10  
11  
12  
13  
14  
15  
16  
17  
18  
19  
20  
21  
22  
23  
24  
25  
26  
27  
28  
29  
30  
31  
32  
33  
34  
35  
36  
37  
38  
39  
40  
41  
42  
43  
44  
45  
46  
47  
48  
49  
50  
51  
52  
53  
54  
55  
56  
57  
58  
59  
60

17. Vera San Juan N, Aceituno D, Djellouli N, Sumray K, Regenold N, Syversen A, et al. Mental health and well-being of healthcare workers during the COVID-19 pandemic in the UK: contrasting guidelines with experiences in practice. *BJPsych Open*. 2020;7(1):e15.
18. Berkhout SG, Sheehan KA, Abbey SE. Individual- and Institutional-level Concerns of Health Care Workers in Canada During the COVID-19 Pandemic: A Qualitative Analysis. *JAMA Netw Open*. 2021;4(7):e2118425.
19. Buckley L, Berta W, Cleverley K, Widger K. Exploring Pediatric Nurses' Perspectives on Their Work Environment, Work Attitudes, and Experience of Burnout: What Really Matters? *Front Pediatr*. 2022;10:851001.
20. Khajuria A, Tomaszewski W, Liu Z, Chen J-h, Mehdian R, Fleming S, et al. Workplace factors associated with mental health of healthcare workers during the COVID-19 pandemic: an international cross-sectional study. *BMC Health Services Research*. 2021;21:1-11.
21. Cyr S, Marcil M-J, Marin M-F, Tardif J-C, Guay S, Guertin M-C, et al. Factors Associated With Burnout, Post-traumatic Stress and Anxio-Depressive Symptoms in Healthcare Workers 3 Months Into the COVID-19 Pandemic: An Observational Study. *Frontiers in Psychiatry*. 2021;12:668278.
22. Wanigasooriya K, Palimar P, Naumann DN, Ismail K, Fellows JL, Logan P, et al. Mental health symptoms in a cohort of hospital healthcare workers following the first peak of the COVID-19 pandemic in the UK. *BJPsych Open*. 2021;7(1).
23. Munn LT, Liu TL, Swick M, Rose R, Broyhill B, New L, et al. Original Research: Well-Being and Resilience Among Health Care Workers During the COVID-19 Pandemic: A Cross-Sectional Study. *Am J Nurs*. 2021;121(8):24-34.
24. Havaei F, Ma A, Staempfli S, MacPhee M. Nurses' Workplace Conditions Impacting Their Mental Health during COVID-19: A Cross-Sectional Survey Study. *Healthcare (Basel)*. 2021;9(1).
25. Hines SE, Chin KH, Glick DR, Wickwire EM. Trends in Moral Injury, Distress, and Resilience Factors among Healthcare Workers at the Beginning of the COVID-19 Pandemic. *International Journal of Environmental Research and Public Health*. 2021;18:488.
26. Pollock A, Campbell P, Cheyne J, Cowie J, Davis B, McCallum J, et al. Interventions to support the resilience and mental health of frontline health and social care professionals during and after a disease outbreak, epidemic or pandemic: a mixed methods systematic review. *Cochrane Database Syst Rev*. 2020;11:CD013779.
27. Khanji MY, Maniero C, NG S, Siddiqui I, Gupta J, Crosby L, et al. Early and Mid-Term Implications of the COVID-19 Pandemic on the Physical, Behavioral and Mental Health of Healthcare Professionals: The CoPE-HCP Study Protocol. *Frontiers in Psychology*. 2021;12:39.
28. Spitzer RL, Kroenke K, Williams JB, Lowe B. A brief measure for assessing generalized anxiety disorder: the GAD-7. *Arch Intern Med*. 2006;166(10):1092-7.
29. Morin CM, Belleville G, Belanger L, Ivers H. The Insomnia Severity Index: psychometric indicators to detect insomnia cases and evaluate treatment response. *Sleep*. 2011;34(5):601-8.
30. Kroenke K, Spitzer RL, Williams JB. The PHQ-9: validity of a brief depression severity measure. *J Gen Intern Med*. 2001;16(9):606-13.
31. Tennant R, Hiller L, Fishwick R, Platt S, Joseph S, Weich S, et al. The Warwick-Edinburgh Mental Well-being Scale (WEMWBS): development and UK validation. *Health Qual Life Outcomes*. 2007;5:63.
32. Li-Sauerwine S, Rebillot K, Melamed M, Addo N, Lin M. A 2-Question Summative Score Correlates with the Maslach Burnout Inventory. *Western Journal of Emergency Medicine*. 2020;21:617.
33. Braun V, Clarke V. Using thematic analysis in psychology. *Qualitative Research in Psychology*. 2006;3:77-101.
34. Shevlin M, McBride O, Murphy J, Miller JG, Hartman TK, Levita L, et al. Anxiety, depression, traumatic stress and COVID-19-related anxiety in the UK general population during the COVID-19 pandemic. *BJPsych Open*. 2020;6.



- 1  
2  
3 1 35. Jordan J-A, Shannon C, Browne D, Carroll E, Maguire J, Kerrigan K, et al. COVID-19 Staff  
4 2 Wellbeing Survey: longitudinal survey of psychological well-being among health and social care staff  
5 3 in Northern Ireland during the COVID-19 pandemic. *BJPsych Open*. 2021;7:e159.  
6 4  
7 4 36. Khajuria A, Tomaszewski W, Liu Z, Chen J-h, Mehdian R, Fleming S, et al. Workplace factors  
8 5 associated with mental health of healthcare workers during the COVID-19 pandemic: an  
9 6 international cross-sectional study. *BMC Health Services Research* 2021;21:1-11.  
10 7  
11 7 37. Preti E, Di Mattei V, Perego G, Ferrari F, Mazzetti M, Taranto P, et al. The Psychological  
12 8 Impact of Epidemic and Pandemic Outbreaks on Healthcare Workers: Rapid Review of the Evidence.  
13 9 *Current Psychiatry Reports*. 2020;22:1-22.  
14 10  
15 10 38. Sconfienza C, Lindfors P, Lantz Friedrich A, Sverke M. Social support at work and mental  
16 11 distress: A three-wave study of normal, reversed, and reciprocal relationships. *J Occup Health*.  
17 12 2019;61(1):91-100.  
18 13  
19 13 39. Mental health and psychosocial considerations during the COVID-19 outbreak [press  
20 14 release]. World Health Organization 2020.  
21 15  
22 15 40. Belfroid E, Steenbergen Jv, Timen A, Ellerbroek P, Huis A, Hulscher M. Preparedness and the  
23 16 importance of meeting the needs of healthcare workers: a qualitative study on Ebola. *Journal of*  
24 17 *Hospital Infection*. 2018;98:212-8.  
25 18  
26 19  
27 20  
28  
29  
30  
31  
32  
33  
34  
35  
36  
37  
38  
39  
40  
41  
42  
43  
44  
45  
46  
47  
48  
49  
50  
51  
52  
53  
54  
55  
56  
57  
58  
59  
60

Confidential

## Tables and Figures

**Table 1. Baseline characteristics of HCPs at baseline (n, 1574) and follow-up (n, 744).**

|                                   | Response                              | Baseline (n, 1574) (%) | Follow-up (n, 744) (%) |
|-----------------------------------|---------------------------------------|------------------------|------------------------|
| <b>Age</b>                        | 18-25 years                           | 76 (4.8)               | 31 (4.2)               |
|                                   | 26-35 years                           | 390 (24.8)             | 175 (23.5)             |
|                                   | 36-50 years                           | 638 (40.5)             | 298 (40.1)             |
|                                   | 51-60 years                           | 372 (23.6)             | 185 (24.9)             |
|                                   | 61-70 years                           | 92 (5.8)               | 51 (6.9)               |
|                                   | > 70 years                            | 6 (0.4)                | 4 (0.5)                |
| <b>Ethnicity</b>                  | White                                 | 1027 (65.3)            | 587 (78.9)             |
|                                   | Asian                                 | 359 (22.8)             | 93 (12.5)              |
|                                   | Black                                 | 74 (4.7)               | 27 (3.6)               |
|                                   | Mixed                                 | 48 (3.1)               | 19 (2.6)               |
|                                   | Other                                 | 39 (2.5)               | 12 (1.6)               |
|                                   | Prefer not to say                     | 27 (1.7)               | 6 (0.81)               |
| <b>Gender identity</b>            | Female                                | 1105 (70.2)            | 562 (75.5)             |
|                                   | Male                                  | 447 (28.4)             | 178 (23.9)             |
|                                   | Prefer not to say                     | 14 (0.9)               | 3 (0.4)                |
|                                   | Prefer to self-define                 | 8 (0.5)                | 1 (0.1)                |
| <b>Relationship status</b>        | Divorced                              | 54 (3.4)               | 27 (3.6)               |
|                                   | Prefer not to say                     | 46 (2.9)               | 21 (2.8)               |
|                                   | Married/Living with partner or family | 1048 (66.6)            | 496 (66.7)             |
|                                   | Other                                 | 52 (3.3)               | 22 (3.0)               |
|                                   | Single                                | 374 (23.8)             | 178 (23.9)             |
| <b>Number living in household</b> | 1                                     | 210 (13.3)             | 104 (14.0)             |
|                                   | 2                                     | 487 (30.9)             | 252 (33.9)             |
|                                   | 3-5                                   | 799 (50.8)             | 367 (49.3)             |
|                                   | 6 or more                             | 78 (5.0)               | 21 (2.8)               |
| <b>Highest level of education</b> | A-levels                              | 113 (7.2)              | 61 (8.2)               |
|                                   | Bachelor's / diploma                  | 735 (46.7)             | 346 (46.5)             |
|                                   | Master's / PhD                        | 613 (39.0)             | 290 (39.0)             |
|                                   | Other                                 | 113 (7.2)              | 47 (6.3)               |

*Note.* HCP = healthcare professional. All demographic data is self-reported. 'Asian' category includes South Asian, Chinese, and any other Asian background. 'Mixed' category includes mixed Black and White, mixed Asian and White, and mixed any other/multiple ethnic backgrounds.

**Table 2.** Separate linear regressions for the association between change in perceived level of support and change in raw mental health, burnout, and wellbeing scores in HCPs from baseline to follow-up (n, 681).

|         | Crude       |                          |         | Adjusted      |                            |           |
|---------|-------------|--------------------------|---------|---------------|----------------------------|-----------|
|         | Coefficient | 95% Confidence Intervals | P Value | Coefficient * | 95% Confidence Intervals * | P value * |
| GAD-7   | -0.10       | -0.21 to 0.01            | 0.075   | -0.13         | -0.25 to -0.01             | 0.036     |
| PHQ-9   | -0.19       | -0.30 to -0.08           | 0.001   | -0.17         | -0.29 to -0.04             | 0.008     |
| ISI     | -0.07       | -0.19 to 0.05            | 0.226   | -0.13         | -0.26 to 0.01              | 0.067     |
| EEDP2Q  | -0.05       | -0.12 to 0.01            | 0.112   | -0.06         | -0.13 to 0.02              | 0.139     |
| SWEMWBS | 0.17        | 0.08 to 0.27             | < 0.001 | 0.19          | 0.10 to 0.29               | < 0.001   |

*Note.* Crude and adjusted coefficients provided.

\*adjusted for age, gender identity, education, relationship status, number living in household, currently diagnosed mental health condition, currently diagnosed physical health condition, role (medical doctor vs. HCAs, nurses, and AHPs), and baseline level of support.

1

**Table 3. Workplace support themes based on responses from HCP only\***

| Theme                                              | Description                                                                                                                                                                                                                                                                                                   | Quotes                                                                                                                                                                                                                                                                                                                                                                                                                                                                                                                                                                                                                                        |
|----------------------------------------------------|---------------------------------------------------------------------------------------------------------------------------------------------------------------------------------------------------------------------------------------------------------------------------------------------------------------|-----------------------------------------------------------------------------------------------------------------------------------------------------------------------------------------------------------------------------------------------------------------------------------------------------------------------------------------------------------------------------------------------------------------------------------------------------------------------------------------------------------------------------------------------------------------------------------------------------------------------------------------------|
| <b>Concern/<br/>understanding<br/>for welfare</b>  | Genuine concern for welfare.                                                                                                                                                                                                                                                                                  | <i>"Direct check in. How am I doing, and actually listen to the answer. I have been left to get on with it, with a few platitudes "Ohh its hard"."</i>                                                                                                                                                                                                                                                                                                                                                                                                                                                                                        |
|                                                    | <ul style="list-style-type: none"> <li>Managers who listened and left staff feeling understood and with consistent support were valued.</li> <li>A few comments citing check-ins and appropriate training from original line-managers as being significant to their mental health when redeployed.</li> </ul> | <p><i>"Would have wanted more recognition from management about impact and repercussions of redeployment but support from colleagues was good within the team."</i></p> <p><i>"I had no contact with my original team during my redeployment, I found this very stressful which increased my anxiety."</i></p>                                                                                                                                                                                                                                                                                                                                |
|                                                    | Flexibility and understanding.                                                                                                                                                                                                                                                                                | <i>"Better understanding of peoples personal situations. I am a full-time unpaid carer for partner who was told to shield for 12 weeks. Due to his condition (a Traumatic Brain Injury and Epilepsy) I was unable to leave him unsupervised for long periods of time as his seizures are fatal and in the event of one he needs medication administered to him to save his life...I requested to be able to work from home due these extenuating circumstances which was denied which caused me and my partner extreme stress...I think it needs to be looked at as a case by case basis and not as a staffing level or need as a whole."</i> |
|                                                    | Psychological support.                                                                                                                                                                                                                                                                                        | <i>"Wellbeing support with a named psychologist allocated to our team right from the start."</i>                                                                                                                                                                                                                                                                                                                                                                                                                                                                                                                                              |
|                                                    | <ul style="list-style-type: none"> <li>One-to-one confidential counselling and/or access to clinical psychologist was cited as useful for HCPs mental health.</li> </ul>                                                                                                                                      | <i>"I would have wanted one-on-one therapy sessions with an external professional. We were offered these with our own psychology department free of charge though often work closely with these individuals."</i>                                                                                                                                                                                                                                                                                                                                                                                                                             |
| <b>Information</b>                                 | This broad theme generally describes HCPs requests for regular clear, consistent, and transparent communication/updates sent on a timely manner.                                                                                                                                                              | <i>"I found it really helpful to have daily or twice weekly staff team briefings with updates on PPE, procedures etc and a chance to ask questions. In the early part of the pandemic, one of the most stressful things was the sheer volume of information coming at us and constant changes to what we should be doing, what PPE we needed in which area etc."</i>                                                                                                                                                                                                                                                                          |
|                                                    | Participants sometimes cited daily staff briefings, regular bulletins, and daily huddles as being useful modes of communication.                                                                                                                                                                              | <i>"Better communication - it felt like as a nurse being redeployed that we were deliberately kept in the dark about operations surrounding Covid-19 as the trust management were more paranoid about details being leaked to the press than staff welfare."</i>                                                                                                                                                                                                                                                                                                                                                                              |
| <b>Tangible<br/>qualities of the<br/>workplace</b> | Adequate staffing                                                                                                                                                                                                                                                                                             | <i>"Not sure. Managing staff shortages was difficult and extra work needed. Now we have burnout from covering."</i>                                                                                                                                                                                                                                                                                                                                                                                                                                                                                                                           |
|                                                    | <ul style="list-style-type: none"> <li>Several comments describing ensuring adequate staffing in response to staff sicknesses and/or heightened workload, for example.</li> </ul>                                                                                                                             |                                                                                                                                                                                                                                                                                                                                                                                                                                                                                                                                                                                                                                               |
|                                                    | PPE/safety                                                                                                                                                                                                                                                                                                    | <i>"At the beginning of the pandemic, the PPE was rationed strictly and that caused a lot of anxiety. Those initial contacts with patient meant those staff member developed symptoms and got ill. This caused a lot of anxiety. I fortunately had annual leave for a week and when I got back to work. The PPE was fully available and in use appropriately. Scrubs were a problem especially plus sizes, not available."</i>                                                                                                                                                                                                                |
|                                                    | <ul style="list-style-type: none"> <li>Commonly reported describing training in how to use PPE, safety protocols (e.g. social distancing), regular testing, and access to appropriate PPE.</li> </ul>                                                                                                         |                                                                                                                                                                                                                                                                                                                                                                                                                                                                                                                                                                                                                                               |

|                     |                                                                                                                                                                                                                                                                                                                                                                           |                                                                                                                                                                                                                                                                                                                                                                                                                                                                                                                                                                                       |
|---------------------|---------------------------------------------------------------------------------------------------------------------------------------------------------------------------------------------------------------------------------------------------------------------------------------------------------------------------------------------------------------------------|---------------------------------------------------------------------------------------------------------------------------------------------------------------------------------------------------------------------------------------------------------------------------------------------------------------------------------------------------------------------------------------------------------------------------------------------------------------------------------------------------------------------------------------------------------------------------------------|
|                     | Financial support                                                                                                                                                                                                                                                                                                                                                         | <i>"Most helpful - being able to drive to and park at work. Food provided at work."</i>                                                                                                                                                                                                                                                                                                                                                                                                                                                                                               |
|                     | <ul style="list-style-type: none"> <li>E.g. free lunches, and free parking so HCPs can drive (and avoid public transport) and no additional expense.</li> </ul>                                                                                                                                                                                                           | <i>"Free meals because there was no food in the shops and also I was so tired after my shift, I couldn't cook. Not having to wash my uniform. I know my manager was doing her best to keep the unit staffed and as safe as possible."</i>                                                                                                                                                                                                                                                                                                                                             |
|                     | Work from home support                                                                                                                                                                                                                                                                                                                                                    | <i>"Not to have to pay back hours lost trying to work from home without necessary equipment needed to enable me to work from home effectively. Necessary equipment should have been provided."</i>                                                                                                                                                                                                                                                                                                                                                                                    |
|                     | <ul style="list-style-type: none"> <li>Few HCPs described support (in terms of IT equipment, software support to facilitate working from home as being significant.</li> </ul>                                                                                                                                                                                            |                                                                                                                                                                                                                                                                                                                                                                                                                                                                                                                                                                                       |
| <b>Leadership</b>   | Visibility                                                                                                                                                                                                                                                                                                                                                                | <i>"Felt top senior management/directors were not visible during the peak and now- highlighting a big disconnect between the realities of working on the shop floor and those making the decisions."</i>                                                                                                                                                                                                                                                                                                                                                                              |
|                     | <ul style="list-style-type: none"> <li>Staff felt there was a lack of senior managerial presence "on the ground", resulting in patient-facing staff feeling uncared for, disconnected with decision makers and that they lacked genuine understanding of the difficulties experienced.</li> </ul>                                                                         |                                                                                                                                                                                                                                                                                                                                                                                                                                                                                                                                                                                       |
|                     | Available/approachable                                                                                                                                                                                                                                                                                                                                                    | <i>"Most helpful was having a manager who was always available and actively trying to improve the situation for us all, thinking of things to change before it needed changing etc. Very grateful."</i>                                                                                                                                                                                                                                                                                                                                                                               |
|                     | <ul style="list-style-type: none"> <li>Few brief comments expressing gratitude for their managers/supervisors being approachable.</li> <li>Few comments relating to being glad that supervisors were available to help, or the availability of wellbeing support services.</li> </ul>                                                                                     |                                                                                                                                                                                                                                                                                                                                                                                                                                                                                                                                                                                       |
|                     | Reassurance                                                                                                                                                                                                                                                                                                                                                               | <i>"I work in intensive care. We were told "to keep patients alive and anything you do extra is a bonus". This was very comforting to me as I know I will always do my best and more to reach on everything but was this statement by our matron made me feel I could do my job to the best of my ability and not live with the guilt that I hadn't reached on certain things."</i>                                                                                                                                                                                                   |
|                     | <ul style="list-style-type: none"> <li>Few comments highlight the significance of receiving reassurance from their managers regarding tasks and patient care, and reassurance regarding redeployment or job security.</li> </ul>                                                                                                                                          |                                                                                                                                                                                                                                                                                                                                                                                                                                                                                                                                                                                       |
|                     | Higher support for managers                                                                                                                                                                                                                                                                                                                                               | <i>"I am a partner &amp; senior manager. At the height of the crisis there was no one to take to about it. I and the other partners were constantly having to support the staff team. But there was no one for us to go to."</i>                                                                                                                                                                                                                                                                                                                                                      |
|                     | <ul style="list-style-type: none"> <li>Some participants who were managers themselves felt there was no-one to manage or support them.</li> </ul>                                                                                                                                                                                                                         |                                                                                                                                                                                                                                                                                                                                                                                                                                                                                                                                                                                       |
| <b>Peer support</b> | Peer support was frequently stated. This was usually described as helpful and comprised a sense of camaraderie, solidarity/unity, and being open with each other. Some participants appreciated eating lunch together with team and to have informal discussions regarding emotional support. More formal modes of discussion described Balint groups, in a couple cases. | <p><i>"We are a team of 12 working in a "bubble". At the height of the pandemic we split into two teams and working alternate weeks. increased workload and very stressful but we all supported each other and ensured we were all coping!"</i></p> <p><i>"Mealtimes were really important. Meals were free and my manager ensured we all went together and ate lunch together. This seemed to brighten the day and we tried not to talk about work at lunch time. For other team members, she also requested they go back to the office before home time to have a debrief."</i></p> |

\*N = 860.

1  
2  
3  
4  
5  
6  
7  
8  
9  
10  
11  
12  
13  
14  
15  
16  
17  
18  
19  
20  
21  
22  
23  
24  
25  
26  
27  
28  
29  
30  
31  
32  
33  
34  
35  
36  
37  
38  
39  
40  
41  
42  
43  
44  
45  
46  
47  
48  
49  
50  
51  
52  
53  
54  
55  
56  
57  
58  
59  
60

1 **Figure 1.** Flowchart for baseline and follow-up participants.

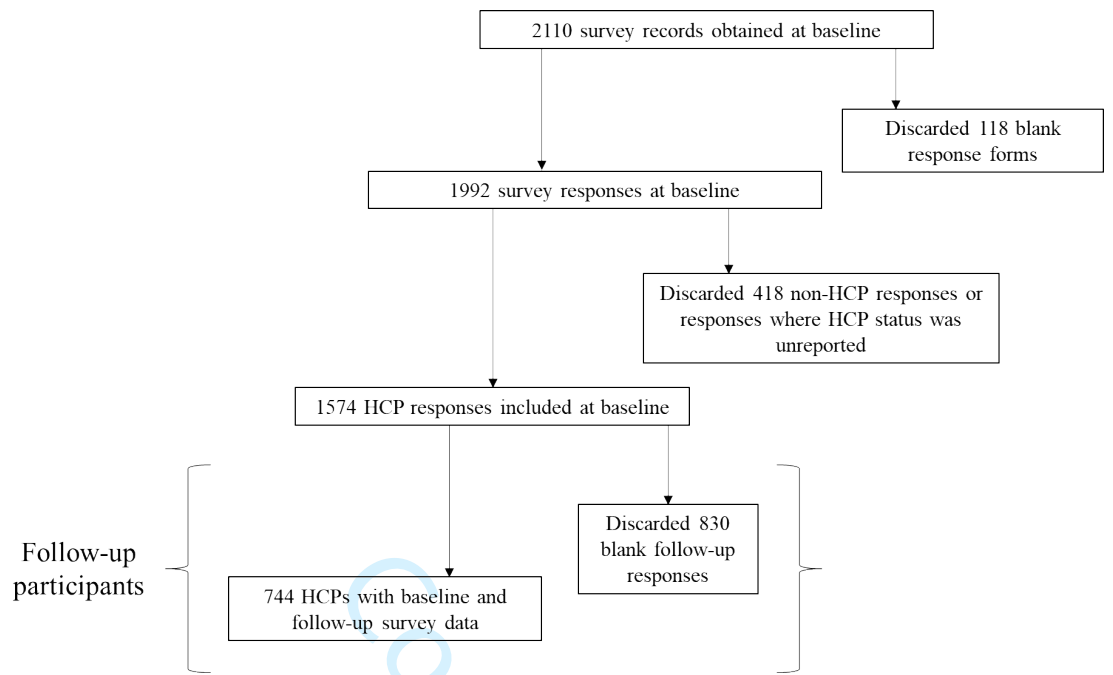

Confidential

2  
3  
4  
5  
6

**Figure 2.** Forest plot displaying the odds ratio (risk) of various mental health and burnout outcomes by perceived level of workplace support amongst HCPs at baseline (n, 1422).

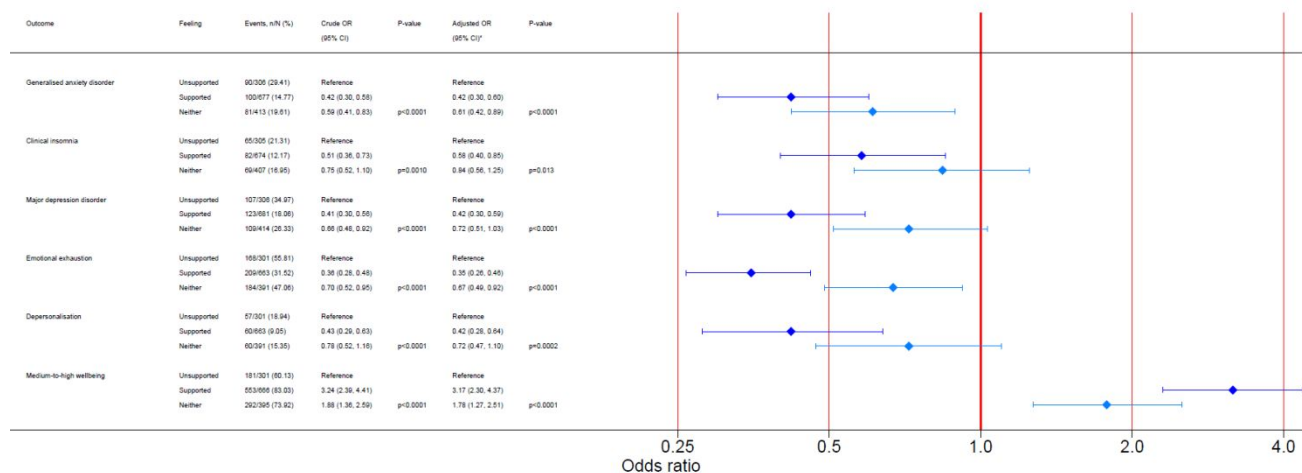

*Note.* Adjusted for age, gender, time elapsed since COVID-19 peak in subject's region, highest level of education, relationship status, number living in household, current mental health diagnosis, current physical health diagnosis, and role. P values are for global trend relating support to each outcome.

**Figure 3.** Forest plot displaying the odds ratio (risk) of various mental health and burnout outcomes by perceived level of workplace support amongst HCPs at follow-up (n, 681).

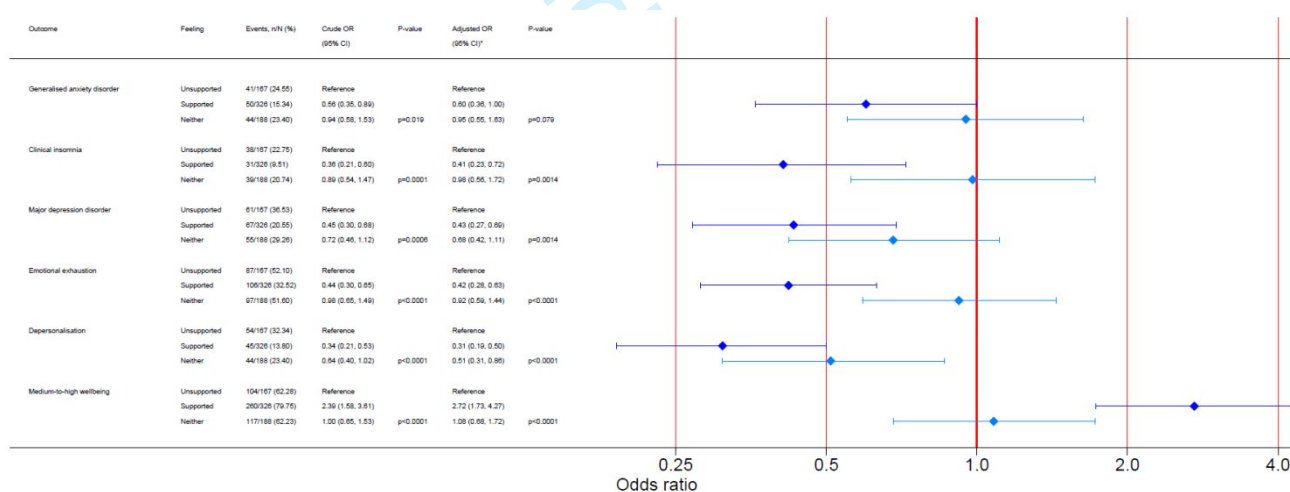

*Note.* Adjusted for age, gender, time elapsed since COVID-19 peak in subject's region, highest level of education, relationship status, number living in household, current mental health diagnosis, current physical health diagnosis, and role. P values are for global trend relating change in level of support to mean scores on each outcome.

1  
2  
3  
4  
5  
6  
7  
8  
9  
10  
11  
12  
13  
14  
15  
16  
17  
18  
19  
20  
21  
22  
23  
24  
25  
26  
27  
28  
29  
30  
31  
32  
33  
34  
35  
36  
37  
38  
39  
40  
41

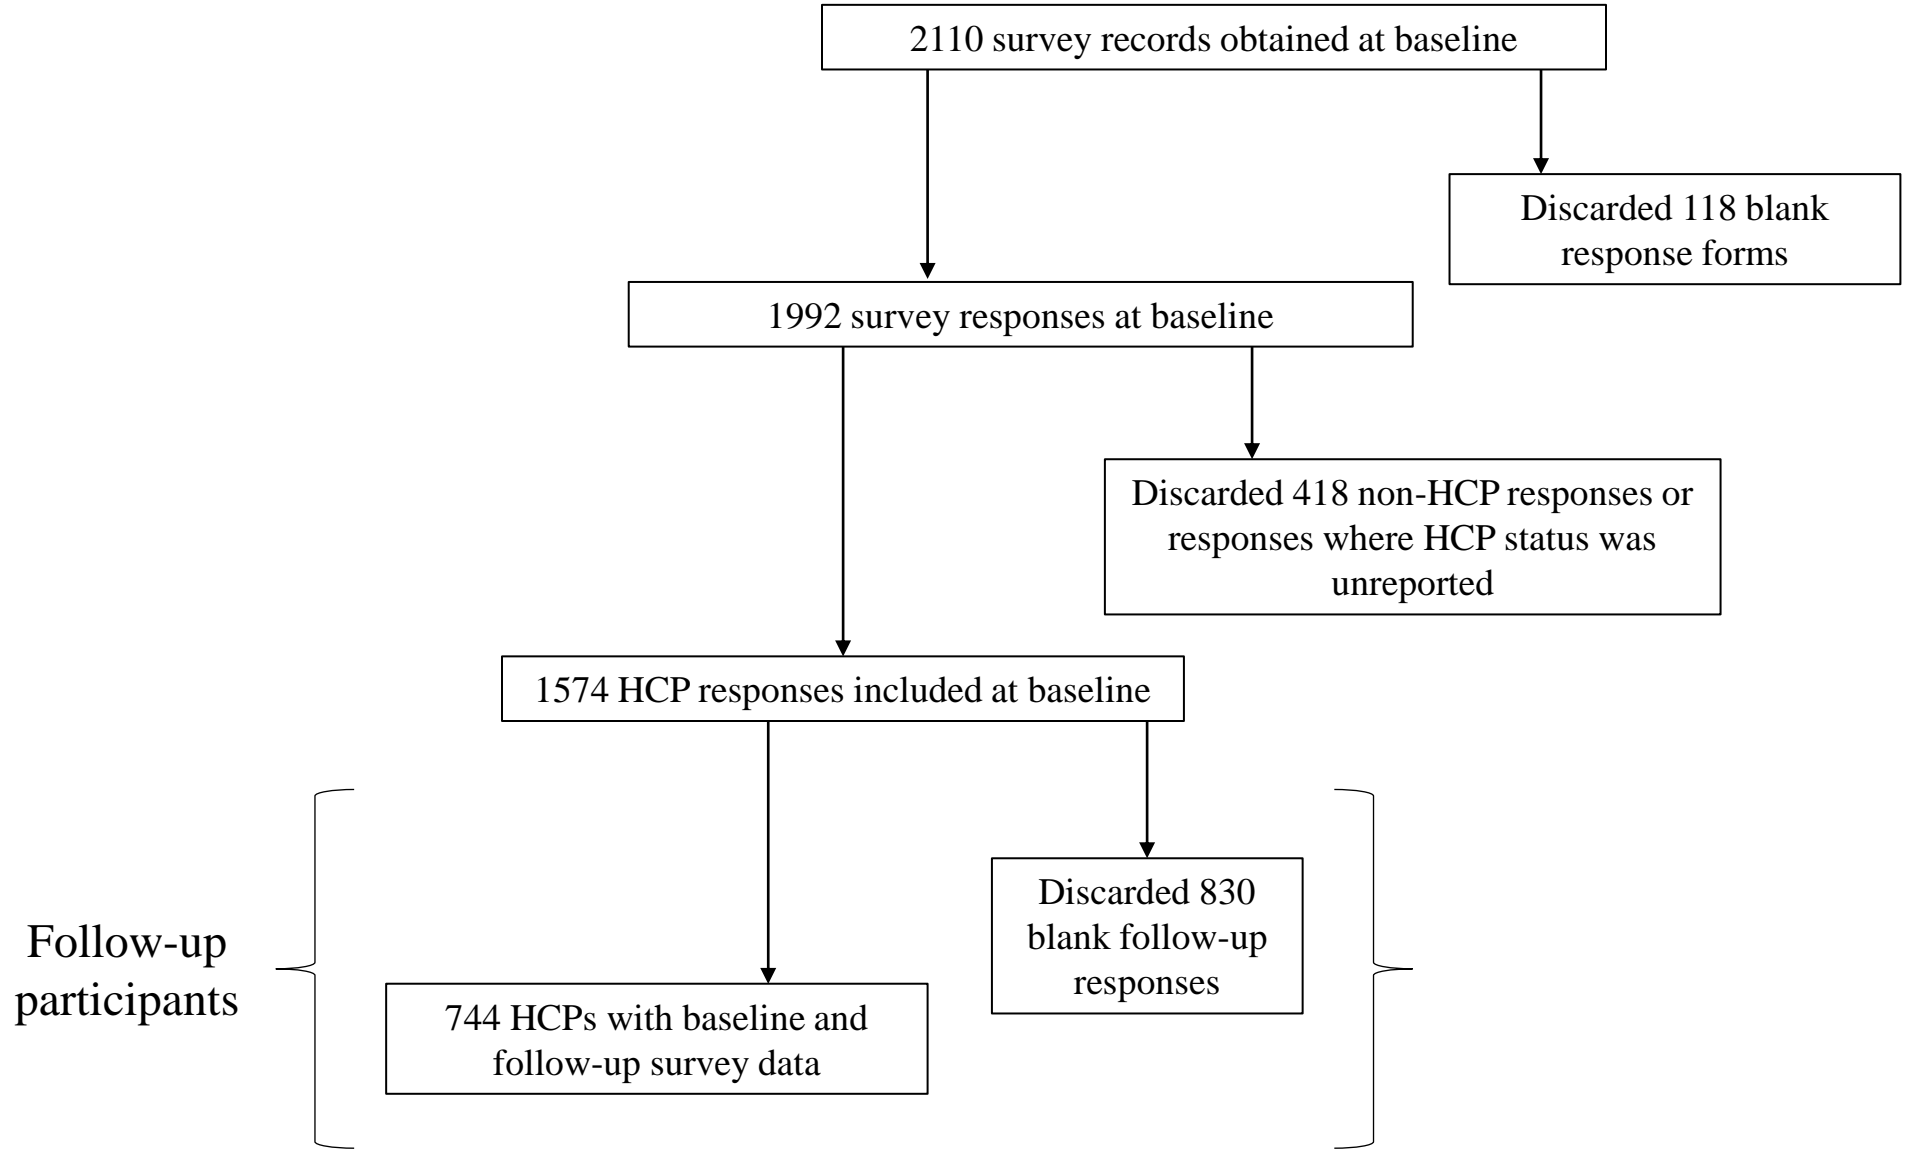



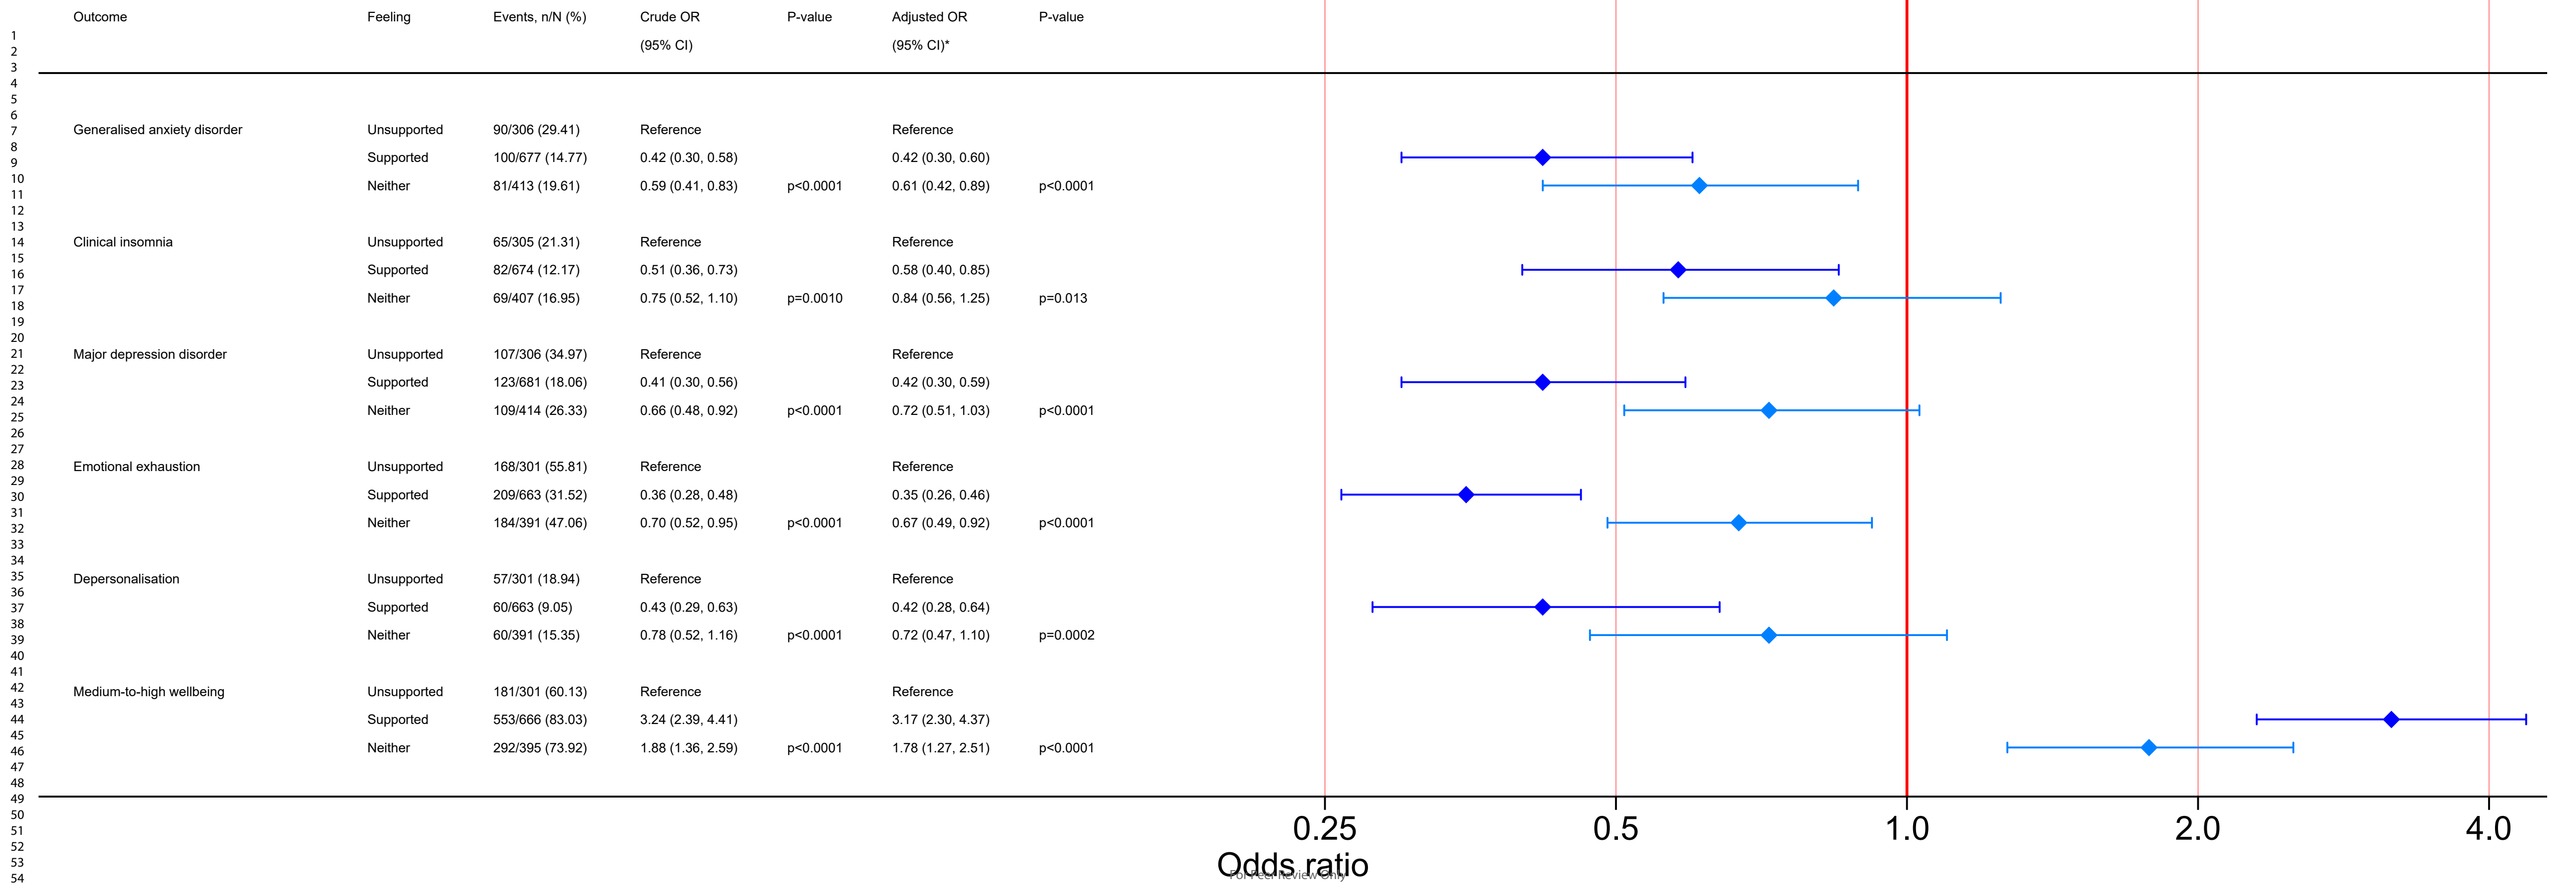

Odds ratio

For Peer Review Only

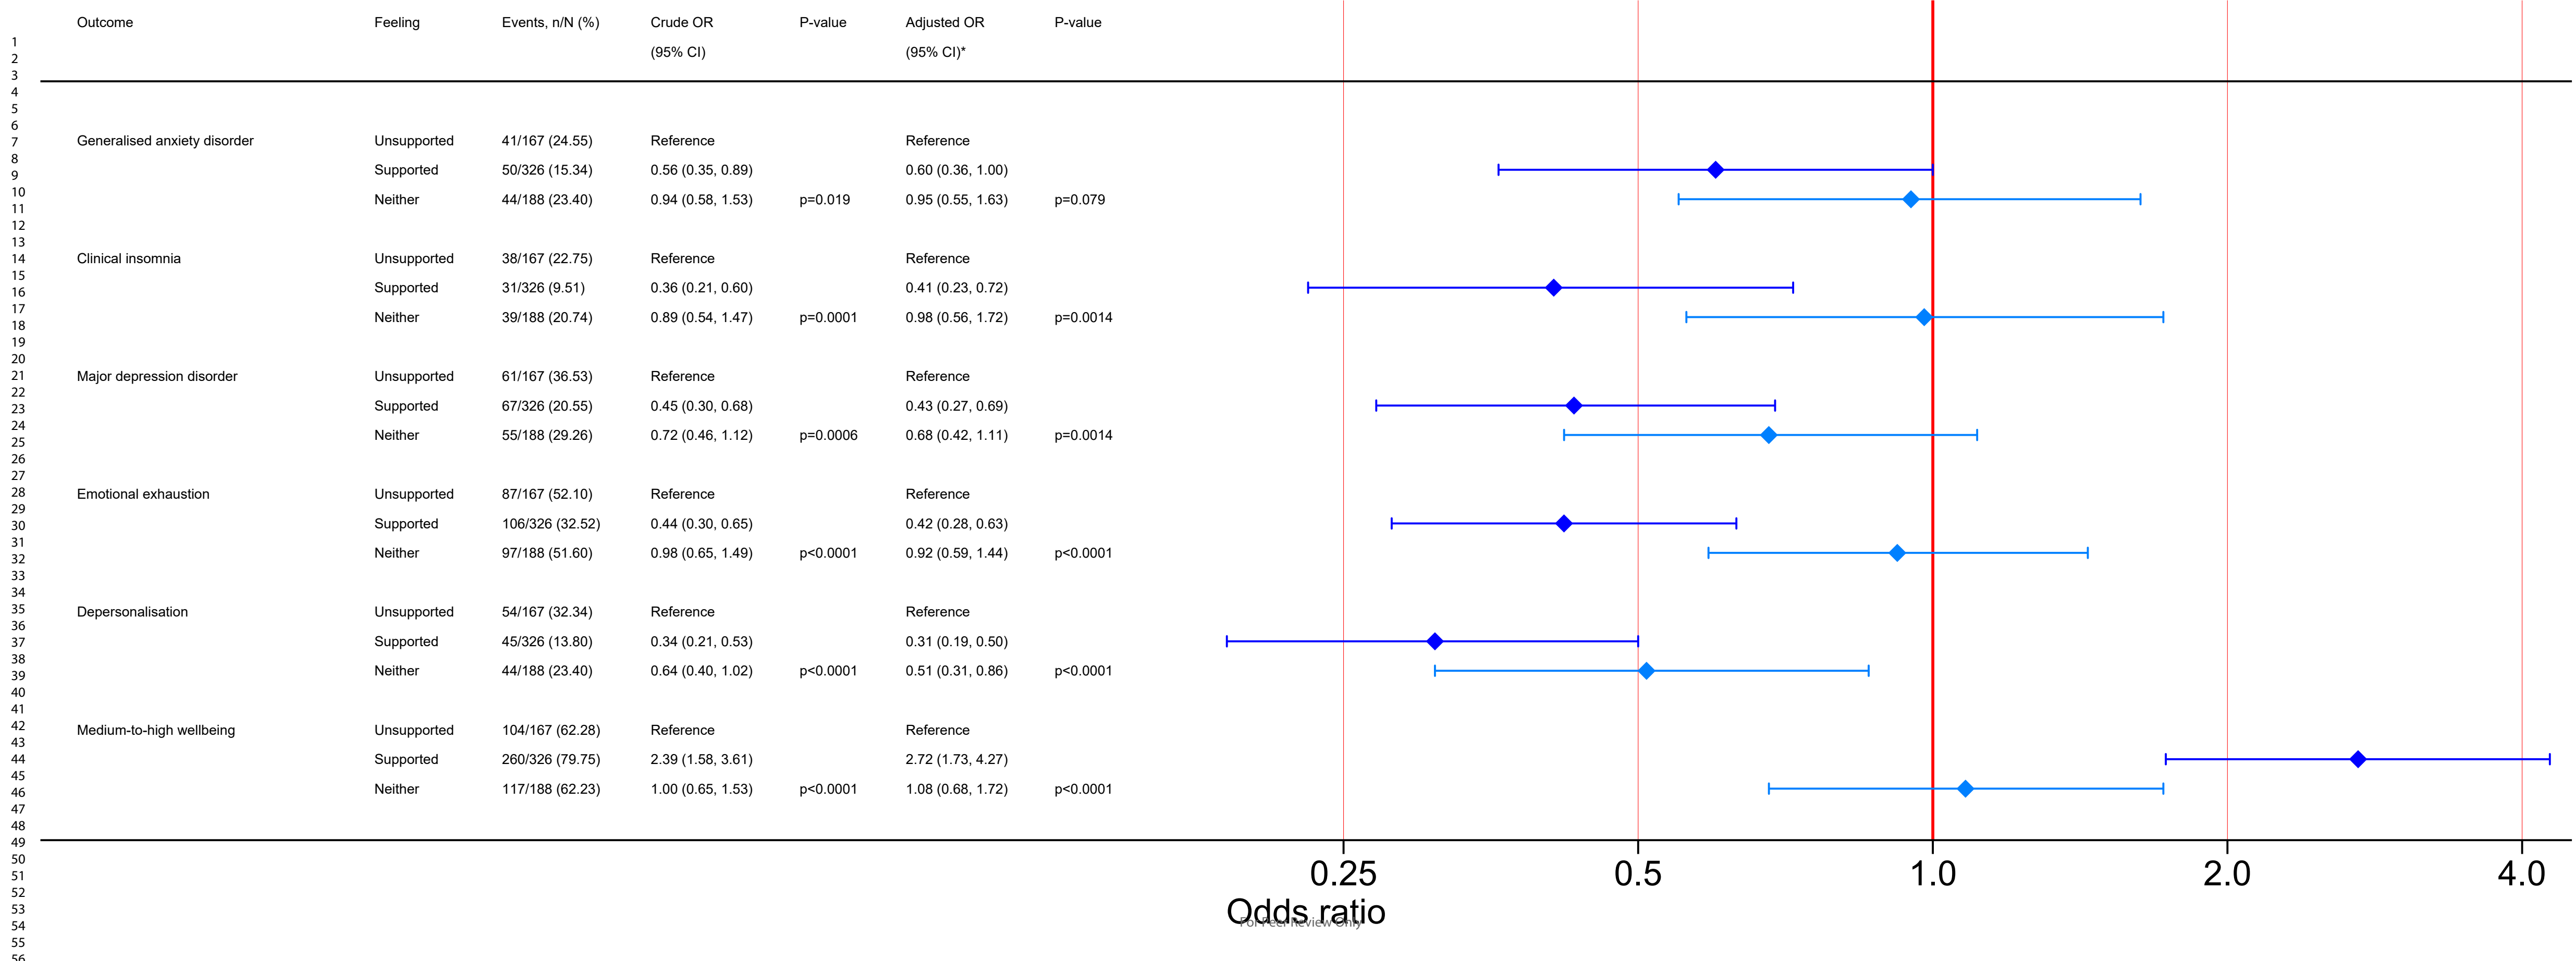

1  
2  
3  
4  
5  
6  
7  
8  
9  
10  
11  
12  
13  
14  
15  
16  
17  
18  
19  
20  
21  
22  
23  
24  
25  
26  
27  
28  
29  
30  
31  
32  
33  
34  
35  
36  
37  
38  
39  
40  
41  
42  
43  
44  
45  
46

### Tables and Figures (Supplementary)

**Supplemental Table 1.** Chi square analysis of demographic characteristics of baseline-only HCPs and cohort HCP participants (n = 1574)

|                            | Response                            | Baseline-only (n, 830) (%) | Follow-up (n, 744) (%) | Chi squared result |
|----------------------------|-------------------------------------|----------------------------|------------------------|--------------------|
| <b>Age</b>                 | 18-25 years                         | 45 (5.4)                   | 31 (4.2)               | 6.5, $p = 0.26$    |
|                            | 26-35 years                         | 215 (25.9)                 | 175 (23.5)             |                    |
|                            | 36-50 years                         | 340 (41.0)                 | 298 (40.1)             |                    |
|                            | 51-60 years                         | 187 (22.5)                 | 185 (24.9)             |                    |
|                            | 61-70 years                         | 41 (4.9)                   | 51 (6.9)               |                    |
|                            | > 70 years                          | 2 (0.2)                    | 4 (0.5)                |                    |
| <b>Ethnicity</b>           | White                               | 440 (53.0)                 | 587 (78.9)             | 121.7, $p < 0.001$ |
|                            | Asian                               | 266 (32.1)                 | 93 (12.5)              |                    |
|                            | Black                               | 47 (5.7)                   | 27 (3.6)               |                    |
|                            | Mixed                               | 29 (3.5)                   | 19 (2.6)               |                    |
|                            | Other                               | 27 (3.3)                   | 12 (1.6)               |                    |
|                            | Prefer not to say                   | 21 (2.5)                   | 6 (0.81)               |                    |
| <b>Gender identity</b>     | Female                              | 543 (65.4)                 | 562 (75.5)             | 23.3, $p < 0.001$  |
|                            | Male                                | 269 (32.4)                 | 178 (23.9)             |                    |
|                            | Prefer not to say                   | 11 (1.3)                   | 3 (0.4)                |                    |
|                            | Prefer to self-define               | 7 (0.8)                    | 1 (0.1)                |                    |
| <b>Relationship status</b> | Divorced                            | 27 (3.3)                   | 27 (3.6)               | 0.74, $p = 0.95$   |
|                            | Prefer not to say                   | 25 (3.0)                   | 21 (2.8)               |                    |
|                            | Married/Living w/ partner or family | 552 (66.5)                 | 496 (66.7)             |                    |
|                            | Other                               | 30 (3.6)                   | 22 (3.0)               |                    |
|                            | Single                              | 196 (23.6)                 | 178 (23.9)             |                    |
| <b>Number living in</b>    | 1                                   | 106 (12.8)                 | 104 (14.0)             | 17.9, $p < 0.001$  |

1  
2  
3  
4  
5  
6  
7  
8  
9  
10  
11  
12  
13  
14  
15  
16  
17  
18  
19  
20  
21  
22  
23  
24  
25  
26  
27  
28  
29  
30  
31  
32  
33  
34  
35  
36  
37  
38  
39  
40  
41  
42  
43  
44  
45  
46

|                                            |                              |            |            |                       |
|--------------------------------------------|------------------------------|------------|------------|-----------------------|
| <b>household</b>                           | 2                            | 235 (28.3) | 252 (33.9) |                       |
|                                            | 3-5                          | 432 (52.1) | 367 (49.3) |                       |
|                                            | 6 or more                    | 57 (6.9)   | 21 (2.8)   |                       |
| <b>Highest level of education</b>          | A-levels                     | 52 (6.3)   | 61 (8.2)   | 3.52, <i>p</i> = 0.32 |
|                                            | Bachelor's / diploma         | 389 (46.9) | 346 (46.5) |                       |
|                                            | Master's / PhD               | 323 (38.9) | 290 (39.0) |                       |
|                                            | Other                        | 66 (8.0)   | 47 (6.3)   |                       |
| <b>Mental health outcomes at baseline*</b> | Major depressive disorder    | 172 (23.9) | 182 (25.5) | 0.54, <i>p</i> = 0.46 |
|                                            | Generalised anxiety disorder | 142 (19.8) | 142 (19.9) | 0.00, <i>p</i> = 0.97 |
|                                            | Clinical insomnia            | 103 (14.6) | 125 (17.6) | 2.31, <i>p</i> = 0.13 |
|                                            | Emotional exhaustion         | 298 (44.0) | 282 (39.8) | 2.41, <i>p</i> = 0.12 |
|                                            | Depersonalisation            | 103 (15.2) | 83 (11.7)  | 3.59, <i>p</i> = 0.06 |
|                                            | High-medium wellbeing        | 173 (25.3) | 176 (24.8) | 0.04, <i>p</i> = 0.84 |

*Note.* All demographic data is self-reported. ‘Asian’ category includes South Asian, Chinese, and any other Asian background. ‘Mixed’ category includes mixed Black and White, mixed Asian and White, and mixed any other/multiple ethnic backgrounds.

\*Missing data for each mental health outcome varies: 1434 participants (721 baseline-only and 713 follow-up) for major depressive disorder, 1429 (716 baseline-only and 713 follow-up) for generalised anxiety disorder, 1418 (706 baseline-only and 712 follow-up) for clinical insomnia, 1386 participants (678 baseline-only and 708 follow-up) for emotional exhaustion and depersonalisation, and 1393 (684 baseline-only and 709 follow-up) for wellbeing.

**Supplementary Table 2. Perceived level of support in HCPs at baseline (n, 1422) and follow-up (n, 681).**

|                                                                                         | Response                               | Baseline, n,1422 (%) | Follow-up, n,681 (%) |
|-----------------------------------------------------------------------------------------|----------------------------------------|----------------------|----------------------|
| Do you think you received adequate support directly from your supervisors/line managers | Felt unsupported                       | 312 (21.9%)          | 167 (24.5)           |
|                                                                                         | Felt supported                         | 689 (48.5%)          | 326 (47.9)           |
|                                                                                         | Felt neither supported nor unsupported | 421 (29.6%)          | 188 (27.6)           |

*Note.* Follow-up participants are those who also provided valid baseline support data.

**Supplemental Figure 1.** Graphical illustration of the distribution of responses for perceived level of workplace support at baseline (n = 1422).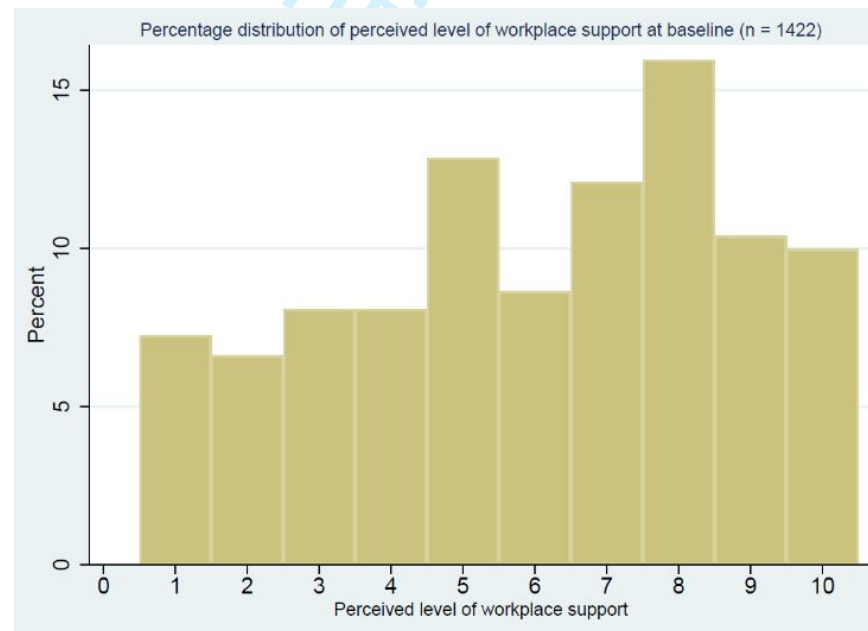

1  
2  
3  
4  
5  
6  
7  
8  
9  
10  
11  
12  
13  
14  
15  
16  
17  
18  
19  
20  
21  
22  
23  
24  
25  
26  
27  
28  
29  
30  
31  
32  
33  
34  
35  
36  
37  
38  
39  
40  
41  
42  
43  
44  
45  
46

**Supplemental Figure 2.** Graphical illustration of the distribution of responses for perceived level of workplace support at follow-up (n = 681).

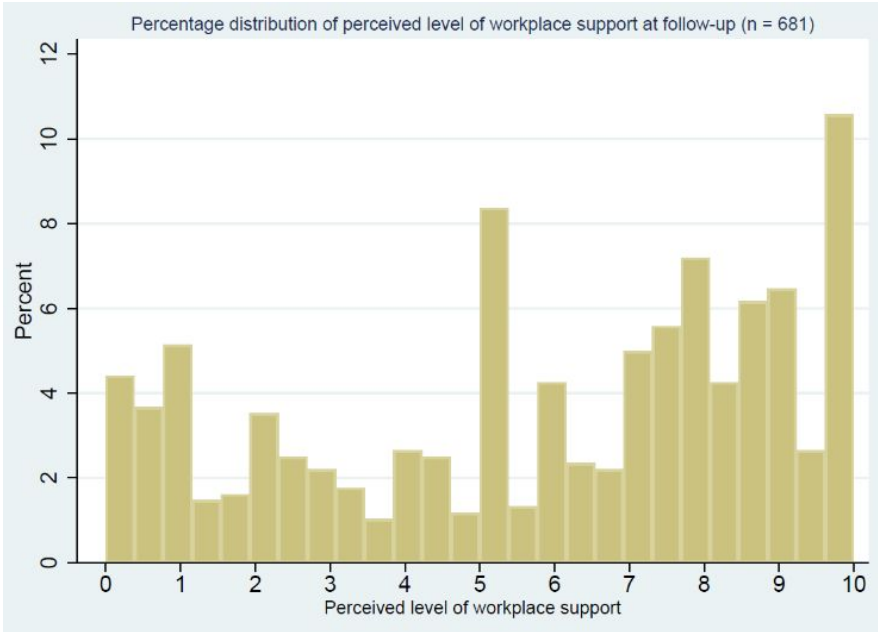

**Supplemental Figure 3.** Graphical illustration of the distribution of the change in perceived level of workplace support from baseline and follow-up (n = 681).

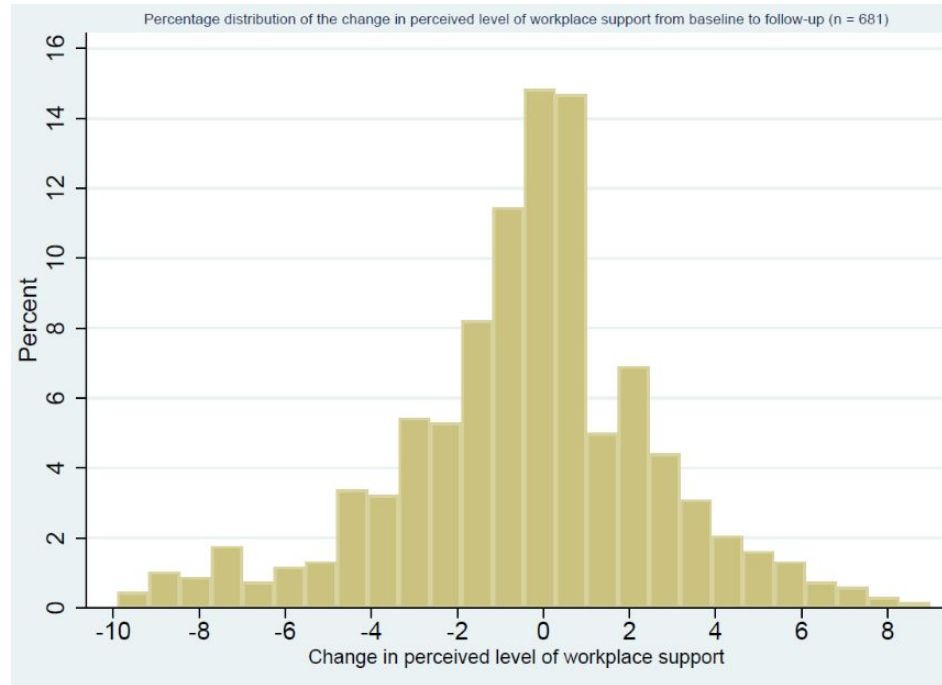

**Title**

The ~~relationship between availability and changes to~~ **relationship between availability and changes to the level of (and changes in)** perceived workplace support and mental health, wellbeing and burnout in healthcare professionals (HCP) during the COVID-19 pandemic: insight and mitigating strategies from the CoPE-HCP cohort study.

**Authors**

Imrana Siddiqui<sup>\*1,2,3</sup> MBBS (joint first author), Jaya Gupta<sup>\*4</sup> MRCPsych (joint first author), Iris McIntosh<sup>5</sup> MRCPsych, Christina Komodromos<sup>6</sup> BSc, Thomas Godec<sup>7</sup> PhD, George Collett<sup>7</sup> PhD, Sher Ng<sup>8</sup> MB BChir, Carmela Maniero<sup>7,8,9</sup> PhD, Sotiris Antoniou<sup>8</sup> MRPharmS, Rehan Khan<sup>9</sup> MRCOG, Vikas Kapil<sup>7,8,9</sup> PhD, Mohammed Y. Khanji<sup>7,8,10</sup> MRCP, and Ajay K. Gupta<sup>7,8,9,11\*\*</sup> PhD, on behalf of COPE-HCP clinical investigators\*\*\*.

**Affiliations**

<sup>1</sup>Wellbeing Hub, Newham Training Hub, London, United Kingdom.

<sup>2</sup>NHS NorthEast London CCG, London, United Kingdom.

<sup>3</sup>Woodgrange Medical Practice, London, United Kingdom.

<sup>4</sup>South West London and St George's Mental Health NHS Trust, London, United Kingdom.

<sup>5</sup>Camden & Islington Foundation Trust, London, United Kingdom.

<sup>6</sup>Barnet, Enfield and Haringey Mental Health NHS Trust, London, United Kingdom.

<sup>7</sup>William Harvey Research Institute, Queen Mary University of London, London, United Kingdom.

<sup>8</sup>Barts Heart Centre, St. Bartholomew's Hospital, Barts Health NHS Trust, London, United Kingdom.

<sup>9</sup>The Royal London Hospital, Barts Health NHS Trust, United Kingdom.

<sup>10</sup>. Newham University Hospital, Barts Health NHS Trust, London, United Kingdom.

<sup>11</sup>National Heart and Lung Institute, Imperial College London, London, United Kingdom.

\*Joint first authors (contributed equally to this manuscript).



1  
2  
3 \*\*Corresponding and senior author: Ajay K. Gupta, William Harvey Research Institute, Queen  
4 Mary University London, London, United Kingdom. [ajay.gupta@qmul.ac.uk](mailto:ajay.gupta@qmul.ac.uk)  
5

6  
7 The corresponding author attests that all listed authors meet authorship criteria and that no  
8 others meeting the criteria have been omitted.  
9

10  
11 \*\*\*See supplementary document for COPE-HCP Clinical Investigators names and affiliations.  
12

### 13 14 **Funding Statement**

15  
16 Barts Charity. The funders had no role in the study design, data collection, data analysis, data  
17 interpretation, or writing of the report.  
18

19  
20 **Word count:** 29733115  
21  
22

23  
24  
25  
26  
27  
28  
29  
30  
31  
32  
33  
34  
35  
36  
37  
38  
39  
40  
41  
42  
43  
44  
45  
46  
47  
48  
49  
50  
51  
52  
53  
54  
55  
56  
57  
58  
59  
60

Confidential

## Abstract

### Background

COVID-19 pandemic is associated with psychological impact amongst healthcare professionals (HCPs). However, little is known about the relationship between ~~the availability and changes to~~ workplace support (WS) and mental health and burnout amongst HCPs, and the effective strategies mitigating this impact.

### Methods

In the CoPE-HCP cohort study, ~~surveys were distributed electronically~~ online surveys were distributed at baseline (July-September 2020; ~~n, 1721; 147 non-HCPs~~), and at follow-up (~four months later; ~~n, 799~~) ~~containing validated screening tools~~ assessing the presence of generalized anxiety disorder (GAD), clinical insomnia, major depressive disorder (MDD), ~~and~~ burnout (emotional exhaustion and depersonalization), and wellbeing. Both surveys assessed self-reported level of WS. For baseline and follow-up, independently, separate logistic regression models relating the level of WS to mental health and burnout were developed after adjusting for a priori confounders. ~~Separate~~ Linear regression models were also developed then conducted, and to relate the change in the perceived level of WS with the change in mental health scores between from baseline and follow-up. Thematic analyses on baseline survey free-text entries were done to evaluate what constitutes effective support.

### Findings

At baseline ( $n = 1422$ ) and follow-up ( $n = 681$ ), consistently, compared to those who felt unsupported, those who felt supported had ~~significantly~~ reduced risk (odds) of GAD (baseline: ~~589%~~ [95% CI ~~of OR of OR~~, 0.3029-0.6057], follow-up: ~~4041%~~ [0.368-1.000-92]), clinical insomnia (~~42%51%~~ [0.4034-0.8569], ~~5966%~~ [0.230-0.7255]), MDD (58% [0.301-0.598], ~~574%~~ [0.2731-0.6974]), emotional exhaustion (65% [0.26-0.46], ~~5861%~~ [0.287-0.6356]) and depersonalization (58% [0.28-0.61], ~~698%~~ [0.1921-0.50]).

In the cohort of those who responded to both surveys, ~~At follow-up~~ From baseline to follow-up, the improvement in perceived level of WS from baseline (vs. baseline) was associated with significantly improved GAD-7 (adjusted difference. ~~-0.131-73~~ [-0.2554, -0.0191]), ISI (~~-0.96~~ [-1.88, -0.04]), PHQ-9 (~~-0.171-32~~ [-0.292-16, -0.0449]), ~~and EEDP2Q (burnout) and~~

1  
2  
3 1 SWEMWBS (wellbeing) (0.19-1.30 [-0.101.82, -0.2979]) scores, independent of baseline level  
4  
5 2 of support.  
6  
7

8 3 We identified five themes constituting WS: ‘managerial support’ was the largest sub-  
9 themeeffective workplace support: 1) concern/understanding for welfare, 2) information, 3)  
10 tangible qualities of the workplace, 4) leadership, and 5) peer support.  
11  
12  
13

## 14 6 **Interpretation**

15  
16  
17 7 These findings ~~demonstrate consistent~~highlight nuanced associations between ~~WS~~perceived  
18 level of (and changes in) WS and mental health and burnout of HCPs, and identifies potential  
19 effective strategies to improve their wellbeingconstituting effective workplace support.  
20  
21  
22

## 23 10 **Trial registration**

24  
25  
26 11 Clinicaltrials.gov (NCT04433260).  
27  
28  
29  
30  
31  
32  
33  
34  
35  
36  
37  
38  
39  
40  
41  
42  
43  
44  
45  
46  
47  
48  
49  
50  
51  
52  
53  
54  
55  
56  
57  
58  
59  
60

1  
2  
3  
4  
5  
6  
7  
8  
9  
10  
11  
12  
13  
14  
15  
16  
17  
18  
19  
20  
21  
22  
23  
24  
25  
26  
27  
28  
29  
30  
31  
32  
33  
34  
35  
36  
37  
38  
39  
40  
41  
42  
43  
44  
45  
46  
47  
48  
49  
50  
51  
52  
53  
54  
55  
56  
57  
58  
59  
60

1

Confidential

## 1 Introduction

2 The coronavirus (COVID-19) pandemic has posed a significant peril to both the physical and  
 3 mental health of the general population, ~~but the pervasive nature of the mental health challenges~~  
 4 ~~is often ignored~~. In particular, the significant toll on healthcare professionals (HCPs) is a  
 5 critical issue that, if not addressed, will impact staffing and ~~threaten healthcare~~ service  
 6 provisions in the future.<sup>(1, 2)</sup> The potential increased vulnerability to mental health issues  
 7 amongst HCPs could be explained by the unique challenges faced by them, including vicarious  
 8 trauma,<sup>(3)</sup> moral injury,<sup>(4-7)</sup> and substantially increased risk of infection.<sup>(8)</sup> Long working hours,  
 9 discrimination for working in hospitals, and workplace practices may also contribute to the  
 10 psychological impact.<sup>(9)</sup> Indeed, recent meta-analyses and studies have attested to this  
 11 considerable toll, with reported prevalence rates of anxiety (26.1%),<sup>(10)</sup> depression (24%),<sup>(11)</sup>  
 12 and burn-out (49.4%)<sup>(12)</sup> among HCPs during the ~~COVID-19~~ pandemic. As such, high quality  
 13 research identifying the factors associated with improved mental health outcomes in HCPs, and  
 14 likely strategies to mitigate them, is an urgent need.<sup>(2)</sup>

15 Workplace support is one potential strategy. ~~In a systematic review of studies relevant~~ Relating  
 16 to previous severe acute respiratory syndrome (SARS) outbreaks, *Brooks et al.* recommend the  
 17 critical role of managers/employers in ensuring clear communication, supportive  
 18 environments, specialised training, and support systems to promote psychological  
 19 wellbeing.<sup>(13)</sup> ~~Concerningly, a~~ cross-sectional survey during the first wave of the COVID-19  
 20 pandemic (data collected from 30<sup>th</sup> March 2020 to 5<sup>th</sup> May 2020) found that most respondents  
 21 (UK HCPs) felt there was inadequate wellbeing support.<sup>(14)</sup> The study, along with other small  
 22 qualitative studies, also highlight the perceived value of organisational support to the mental  
 23 health in HCPs.<sup>(14-19)</sup> Some cross-sectional quantitative studies support an association between  
 24 ~~workplaeworkplacee~~ support and mental health in HCPs<sup>(20-24)</sup> and suggesting workplace  
 25 support to mitigate the psychological burden in HCPs. However, these studies have limitations:  
 26 most are cross-sectional,<sup>(20-25)</sup> some are small<sup>(21, 25)</sup> or offer a non-comprehensive assessment  
 27 of mental health (and neglect issues such as burnout),<sup>(20, 22)</sup> or only focus on qualitative or  
 28 quantitative aspects of support.<sup>(15, 16, 20-25)</sup> Therefore, to inform national and global policy and  
 29 workplace practices, we require robust high-quality studies using comprehensive mental health  
 30 assessments demonstrating improvements in mental health over time.<sup>(26)</sup>

31 Addressing this, the current study (part of the COVID-19 and Physical and Emotional  
 32 Wellbeing of Healthcare Professionals project; CoPE-HCP)<sup>(27)</sup> examined the relationship

1 between perceived level of workplace support and mental health outcomes: generalized anxiety  
 2 disorder, clinical insomnia, major depressive disorder, ~~wellbeing, and~~ burnout (emotional  
 3 exhaustion and depersonalization), and wellbeing twice during the ~~COVID-19~~ pandemic  
 4 (approximately four months apart). We also examined whether changes in perceived level  
 5 ~~of improved~~ workplace support was associated with improved mental health and wellbeing  
 6 outcomes over the four-month period. Finally, we explored what workplace support HCPs want  
 7 ~~and what support HCPs or~~ have found helpful.:-

## 8 **Methods**

9 ~~CoPE HCP is a cohort study with the study protocol~~ The protocol for this cohort study is  
 10 ~~published previously with details of objectives, study design, and methodology.~~<sup>(27)</sup> The study  
 11 was approved by the Cambridge East, Research Ethics Committee (20/EE/0166), and  
 12 ~~corresponding details~~ registered in ClinicalTrials.gov (NCT04433260).

13 The study involved a series of online surveys distributed to HCPs (in the UK and  
 14 internationally). The inclusion criteria for the study were: 1) aged 18 or older, 2) electronic  
 15 consent given, and 3) self-identified as HCP staff. ~~The study involved a series of online surveys~~  
 16 ~~distributed to HCPs (in the UK and internationally) and non-HCPs (academic and research staff~~  
 17 ~~from universities in London, who were not working directly or indirectly with COVID-19~~  
 18 ~~patients). Recruitment was facilitated by health service employers who invited employees by~~  
 19 ~~email containing a link to the survey, and the participants were those who responded to that~~  
 20 ~~invite.~~

21 Initial consent was gained for the baseline survey, and at the end of the baseline survey,  
 22 participants were then asked for their consent to receive any follow-up surveys. Further consent  
 23 was gained at the follow-up survey. :-

24 The baseline survey was conducted between July and September 2020. In the UK, this  
 25 corresponded to the trough of the first wave of COVID-19. The baseline survey gathered  
 26 information such as age, gender, ethnicity, relationship status, ~~and~~ educational attainment, and  
 27 current mental health and physical health diagnosis (a multiple-choice closed-ended item).  
 28 ~~Participants were also asked to select from a range of pre-determined items regarding which~~  
 29 ~~types of support they found most helpful. A free-text item was included eliciting qualitative~~  
 30 ~~data about the support they found most helpful or felt would be helpful.~~

Our primary predictor, workplace support, was assessed by asking participants “Do you think you received adequate support directly from your supervisors/line managers/direct employers? (Mark on scale, with 1 -as no support and 10 as full and professional support)”. if participants felt that they received adequate support directly from their supervisors/line managers/direct employers, indicated on a 10-point Likert scale. This was converted to a 3-level response with scores of 1-3, 4-6, and 7-10 being labelled as ‘felt unsupported’, ‘neither felt supported nor unsupported’, and ‘felt supported’ respectively. ‘Felt unsupported’ served as the reference group in the analysis. A subsequent free-text item was included eliciting qualitative data about what support they found most helpful or felt would be helpful, to supplement perceptions of workplace support.

### *Choice of primary Outcome ascertainment outcome measure*

~~The survey included standardised mental health, wellbeing, and burnout screening tools assessing~~ At each survey, we assessed for the presence of generalized anxiety disorder (using the 7-item Generalized Anxiety Disorder [GAD-7]),<sup>(28)</sup> clinical insomnia (using 7-item Insomnia Severity Index [ISI]),<sup>(29)</sup> major depressive disorder (using 9-item Patient Health Questionnaire [PHQ-9]),<sup>(30)</sup> ~~wellbeing (using the Short Warwick-Edinburgh Mental Wellbeing Score [SWEMWBS]),<sup>(31)</sup> and~~ burnout domains: emotional exhaustion and depersonalization (using single respective 7-point scale items)<sup>(31)</sup>, and wellbeing (using the Short Warwick-Edinburgh Mental Wellbeing Score [SWEMWBS]).<sup>(32)</sup>

The follow-up survey (approximately four months after baseline during the second peak of the pandemic) included the same mental health assessments and, the same item assessing level of workplace ~~support~~ support (excluding free-text item)†. For transparency, due to survey error, the support item at follow-up provided a score between 0 and 100 (as opposed to 0-10 at baseline survey) which was similarly collapsed to a 3-level response: 0-30, 31-69, and 70-100 being labelled as ‘felt unsupported’, ‘neither felt supported nor unsupported’, and ‘felt supported’, respectively, ~~but additionally asked whether there had been a change in the level of support from baseline. Participants could choose ‘more support’, ‘less support’, or ‘similar’.~~

### *Statistical analysis*

Statistical analyses were conducted using STATA v17.0.– Baseline characteristics were compared between those who responded to the follow-up survey and are part of HCP cohort.

1 and those who only responded to first survey and constitute the findings from baseline cross-sectional analysis. —

2  
3 At each survey time point, we separately assessed for the cross-sectional association between  
4 the perceived level of support and the presence of outcomes: generalized anxiety disorder,  
5 clinical insomnia, major depressive disorder, below average wellbeing, emotional exhaustion,  
6 and depersonalization, in accordance with validated cut-offs of respective tools. —Logistic  
7 regression models were developed to estimate crude and adjusted odds ratios (with 95%  
8 confidence intervals, and p-values) in each perceived support group as compared to the  
9 reference group (perceived unsupported). —The We multivariable models were adjusted for pre-  
10 specified risk factors: age, gender, time since COVID-19 peak in the participant's region,  
11 highest level of education, relationship status, number of people living in their household,  
12 currently diagnosed mental health condition (yes/no), currently diagnosed physical health  
13 condition (yes/no), and HCP role (medical doctors [reference group] vs. healthcare assistants,  
14 nurses and midwives, and AHPs).

15 The sStatistical analyseis waeres conducted using STATA v17.0. For the descriptive data,  
16 baseline characteristics were assessed overall, and separately for HCPs and non-HCPs for all  
17 HCPs at baseline and HCPs at both follow-up and baseline. Chi square analysis was conducted  
18 on the baseline characteristics of baseline-only and follow-up participants to examine potential  
19 cohort sample biases. Sources of support found to be most helpful were analysed separately for  
20 HCPs and non-HCPs by calculating percentages.

21 For baseline and follow-up cross-sectional analysis at baseline and follow-up, separate binary  
22 logistic regression models were developed for HCPs and non-HCPs combined, to relate  
23 perceived level of support with the presence of generalized anxiety disorder, clinical insomnia,  
24 major depressive disorder, below average wellbeing, emotional exhaustion, and  
25 depersonalization. —

26 Binary outcomes for each outcome were in accordance with validated cut-offs.

27 The number of events for mental health cut-offs in each group were calculated, and both Crude  
28 and adjusted odds ratios were estimated (with 95% confidence intervals, and p-values) in each  
29 perceived support group as compared to the reference group. The Logistic regression analyses  
30 models were adjusted for pre-specified risk factors: age, gender, time since COVID-19 peak in  
31 the participant's region, highest level of education, relationship status, number of people living  
32 in their household, currently diagnosed mental health condition (yes/no), currently diagnosed



1 physical health condition (yes/no), and HCP role (medical doctors [reference group] vs.  
2 healthcare assistants, nurses and midwives, and AHPs).

3 For cohort analysis, i.e., those who responded to both baseline and follow-up surveys, the  
4 change in scores on mental health and wellbeing mental health and burnout symptoms  
5 was calculated by subtracting the baseline raw score from the follow-up score (follow-up score  
6 was rescaled by dividing by 10) on the respective scales. Changes in perceived workplace  
7 support was calculated by subtracting the baseline raw score (regarding adequate workplace  
8 support) from the follow-up score. Measures between baseline and follow-up were assessed as  
9 continuous outcomes across change in workplace support (vs. baseline level of support), for  
10 HCPs and non-HCPs combined. The mean (and SD) response for each outcome was calculated  
11 for baseline and four months for each support level, and the separate unadjusted and adjusted  
12 (adjusted for the above risk factors and for baseline perceived level of support) linear regression  
13 models were conducted assessing the extent that the change in perceived level of workplace  
14 support is associated with changes in mental health and burnout symptoms over time. Unadjusted  
15 and adjusted mean differences were estimated (with 95% confidence intervals, and p-values) as  
16 compared to the reference group ("less support"). Unadjusted (ANOVA) and adjusted  
17 (ANCOVA; adjusted for baseline perceived level of support and baseline outcomes, and the  
18 above-mentioned adjusted factors) linear regression models were used to estimate the change  
19 in outcome scores between groups.

### 20 *Thematic analysis*

21 The free-text item was analysed using a thematic analysis<sup>(33)</sup> was conducted by four  
22 researchers (JG, IS, IM, CK) for the free-text answers. Responses were analysed inductively,  
23 meaning no pre-selected themes were used to start with, and the analysis was data-driven. The  
24 analysis comprised: First, the raw data was collated into an Excel table and each of the above  
25 researchers familiarised themselves with the data. Initial codes were generated for each  
26 entry of data and were shared amongst the researchers before being refined as a coding  
27 dictionary. Any data entries with limited detail regarding the type of support were regarded as  
28 'unspecified' and not included in refining of codes. The data entries and refined codes were  
29 reviewed and amalgamated into key themes (selected based on salience and the apparent  
30 significance to the participants) and subthemes to best describe the data. generating initial  
31 codes, generating themes, reviewing themes, and defining and finalising the themes. Codes  
32 were compiled in Excel software.

## Results

There were 2110 survey records, of which 118 did not answer any questions, leaving 1992 responses. Of these, it was possible to identify HCPs and non-HCPs in 1721 responses that were included for baseline analysis (Supplementary Figure 1a). Of these 1574 (91.5%) participants were HCPs were included at baseline cross-sectional assessment, and 147 (8.5%) participants were non-HCP and amongst them 744 (47.3%) who responded to the of these participants comprised the follow-up survey comprised of the cohort populationsample and also the separate cross-sectional analysis for the follow-up period only (Figure 1; Table 1). Supplementary Figure 1b shows those who were included in the follow-up study four months later (n,830 from 1087 survey records).

Most of the 1574 HCPs at baseline were from the UK (n = 1321; 83.9%). Of the HCPs based outside the UK (n = 253; 16.1%), most were from North America (37.2%) followed by Asia (34.4%) and Europe (17.4%). Reporting the non-UK country where they were based was optional: of the 202 respondents, 70 (34.7%) were from the USA followed by 63 (31.2%) from India. A total of 30 different countries comprised the non-UK participants. Table 1 shows baseline characteristics of the total population, stratified by HCPs and non-HCPs. Both HCPs and non-HCPs had similar baseline characteristics, except for educational attainment, which was higher in the non-HCP group. This was unsurprising as non-HCPs were mostly university/academic staff, including PhD students. However, compared to non-HCPs, the HCP group was more ethnically diverse.

At baseline (n = 1574; specific number varies for each outcome), 19.9% of 1429 HCPs of all respondents met the criteria for generalized anxiety disorder, 15.2% of 1418 HCPs for clinical insomnia, 23.9% of 1434 HCPs for major depressive disorder, 41.9% of 1386 HCPs for emotional exhaustion, and 13.4% of 1386 HCPs for depersonalization. At cross-sectional evaluation of the follow-up stage (n = 744; specific number varies for each outcome), we observed increased or increased or sustained outcome prevalence rates were observed four months later at the four-month follow-up (n, ) for generalized anxiety disorder (20.8% of 723 HCPs), clinical insomnia (16.3% of 722 HCPs), major depressive disorder (28.0% of 724 HCPs), emotional exhaustion (43.2% of 717 HCPs), and depersonalization (21.2% of 717 HCPs).

## Baseline group and cohort population of HCPs

The bChi-square analysis indicated that baseline characteristics of those who only responded to the baseline survey (n = 1574, 830) were mostly similar to those who responded to both surveys (n = 744, the cohort group), except for significant differences in self-defined ethnicity, gender identity and number of people living in the household (Table 1; Supplemental Table 1). Baseline-only responding participants had relatively higher proportions of self-assigned Asian ethnicity and male gender and belonged to the bigger household (Supplemental (Table 1). Mental health outcomes were not significantly different between those who only responded to the baseline survey and those who responded to both surveys according to chi squared analysis (Supplemental Table 1). However these two groups the proportions of the cohort sample (baseline and follow-up; n = 744) meeting the criteria for any mental health or burnout outcomes did not differ significantly on the proportion of outcomes assessed at the baseline, or to the distribution of perceived level of support from baseline-only participants (n = 830). Regarding baseline demographic characteristics, Ssignificant differences were observed for ethnicity ( $p < .001$ ), gender identity ( $p < .001$ ), number, number living in household ( $p < .001$ ): baseline only participants had relatively higher proportions of Asian and male participants, and generally had more people living in the household than follow-up participants.

## Perception and types of support Perceived level of support at baseline and follow-up

In independent cross-sectional assessments, 1422 participants provided valid data on perceived level of support at baseline and, with 681 of these participants being retained of them provided similar data at follow-up too. As per our pre-defined self-defined 3-level categories (based on for the Likert scales) measuring perceived support, 48.5% of the 1422 HCPs at baseline and 63.4% of non-HCPs reported feeling supported with similar proportions observed in the follow-up sample (47.9% of 681 HCPs), whilst 21.9% of the baseline sample felt unsupported with 24.5% of the follow-up sample reported that they felt unsupported (Supplementary Table 2); see Supplementary Figure 1-3 for percentage distribution of responses for baseline and follow-up perceived level of support, and for the change in perceived support from baseline to follow-up) at baseline (Supplementary Table 1a; n,1564). Support from friends and family, peers, and management were perceived as most helpful to HCPs and non-HCPs, compared to other sources such as media, societies, and government policies (Supplementary Figure 2).

## Relationship between support and mental health and burnout outcomes

1 At baseline (Figure 21a), there was a statistically significant relationship between level of  
 2 support and each mental health and burnout outcome ( $p$  for trends were all  $<0.0001$  except for  
 3 clinical insomnia  $p = .013$ , except for clinical insomnia:  $p=0.0003$ ). Compared with those who  
 4 felt unsupported, respondents who felt supported were significantly less likely to meet the  
 5 criteria for generalized anxiety disorder (adj. odds ratio 0.421, 95% CI 0.3029 to 0.607),  
 6 clinical insomnia (0.584249, 0.4304 to 0.8569), major depressive disorder (0.42, 0.304 to  
 7 0.598), emotional exhaustion (0.35, 0.26 to 0.466), and depersonalisation (0.432, 0.28 to  
 8 0.641). ~~Similarly, on~~ On the SWEMWBS wellbeing measure ~~(Figure 1b)~~, those who felt  
 9 supported were significantly ~~less likely to have probable depression/anxiety (0.28, 0.18 to~~  
 10 ~~0.43), and more likely to meet the criteria for combined~~ more likely to have medium or  
 11 high/average/high wellbeing (3.1751, 2.3059 to 4.377) ~~and high wellbeing (2.01, 1.37 to 2.95).~~

12 Based on 681 valid responses ~~a~~At follow-up (Figure 32a; median 4.9 months after baseline  
 13 survey), ~~799 valid responses (after excluding 31 who didn't answer) were available for analysis~~  
 14 ~~(Supplementary Table 1b, Supplementary Figure 1b). At follow-up, there was a statistically~~  
 15 ~~significant relationship between level of support and each mental health and burnout outcome.~~  
 16 ~~c~~Compared to those who felt unsupported, those who felt supported were significantly less  
 17 likely to meet the criteria for ~~generalized anxiety disorder (0.59, 0.38 to 0.92)~~, clinical insomnia  
 18 (0.34, 0.20 to 0.585), major depressive disorder (0.46, 0.304 to 0.7069), emotional exhaustion  
 19 (0.39, 0.27 to 0.586), and depersonalisation (0.32, 0.204 to 0.510). Similarly, on the  
 20 SWEMWBS wellbeing measure, those who felt supported were more likely to have medium  
 21 or high wellbeing (2.72, 1.73 to 4.27). Borderline significance was met for generalized anxiety  
 22 disorder (0.60, 0.36 to 1.00) when comparing perceived supported to perceived unsupported  
 23 HCPs. Similarly, on the SWEMWBS wellbeing measure (Figure 2b), those who felt supported  
 24 were less likely to have probable depression/anxiety (0.28, 0.16 to 0.52), and more likely to  
 25 have combined average/high wellbeing (2.83, 1.91 to 4.19) and high wellbeing (2.02, 1.22 to  
 26 3.33).

27 *Change in level of workplace support and improvement in mental health outcomes over time*

28 In the cohort of participants with data at both baseline and follow-up ( $n = 681$ ), tThere was a  
 29 consistent association between perceived change in workplace supportthe change in perceived  
 30 level of support and at follow-up (vs. baseline level of support) and the change in scores on  
 31 some, but not all, mental health outcomes mental health outcomes (Table 2Figure 3;  $p$  for trends  
 32 were  $<0.01$  except for clinical insomnia where  $p=0.08$ ). In comparison to participants who

perceived receiving less support compared to baseline, those who felt workplace support had improved had significantly improved GAD-7 (adj. -1.73, 95% CI -2.54 to -0.91), ISI (-0.96, -1.88 to -0.04), PHQ-9 (-1.32, -2.16 to -0.49), SWEMWBS (0.97, 0.37 to 1.57), and combined emotional exhaustion and depersonalization (-1.30, -1.82 to -0.79) scores. Separate adjusted linear regression models showed that a whole unit increase in change in perceived level of support was inversely associated with the change in GAD-7 anxiety scores (coefficient -0.13 [-0.25 to -0.01]  $p = .04$ ), PHQ-9 depression scores (-0.17 [-0.29 to -0.04]  $p < 0.01$ ), and positively associated with the change in SWEMWBS wellbeing scores (0.19 [0.10 to 0.29]  $p < 0.001$ ). No significant associations were observed between change in perceived level of support and the change in ISI insomnia ( $p = 0.067$ ) or EEDP2Q burnout scores ( $p = 0.139$ ).

The significant association between improved perceived workplace support and improved outcome scores was independent of baseline level of support, with the interaction test for each mental health outcome being not statistically significant (interaction test  $p$ -values: GAD-7,  $p=0.20$ ; ISI,  $p=0.63$ ; PHQ-9,  $p=0.06$ ; SWEMWBS,  $p=0.88$ , and combined emotional exhaustion and depersonalization,  $p=0.21$ ).

#### *Themes: what constitutes effective support*

1870 free text responses from 1721 respondents were analysed. 860 free-text entries were included in the thematic analysis to illustrate what qualities/aspects of workplace support are perceived as most helpful. We identified 5 overarching themes describing: Five themes relating to support were identified: 'support from others', 'basic needs and physical resources', 'information', 'psychological interventions', and a smaller theme labelled 'other support' (Supplementary Table 2). 42 sub-themes of support needs were identified. Figure 4 shows the four key themes and sub-themes.

The largest theme was 'support from others', of which 'managerial support' was the largest sub-theme, with 386 comments (Table 2). This sub-theme highlights the desire for more managerial support, both within teams and at higher levels, to provide clear communication and visibility on the ground, approachability, and genuine concern for employees. Moreover, 'peer support' was the second largest sub-theme, with 295 comments. 1) concern or recognition regarding welfare, 2) information, 3) tangible qualities of the workplace, 4) leadership, and 5) peer support (see Table 3 for full details and exemplar quotes).

Within the theme 'basic needs and physical resources', many respondents mentioned sick leave, adequate staffing numbers, working from home, and flexible working hours. 'Risk

assessment and PPE' was the third largest sub-theme with 151 comments, describing thorough risk assessments and better provision of PPE. Smaller sub-themes included provision of food, parking, and childcare.

Within the 'information' theme, the largest sub-theme was having regular updates/meetings/briefings. Other comments described the need for clear signposting and policy/guidelines.

Within 'psychological interventions', most comments centred on provision of psychological therapy, but sub-themes included general wellbeing, reflective spaces, and emotional support. This theme was not as salient relative to the other themes.

Finally, the least salient theme, 'other support' (not included in illustration), describes the need for recognition for difficult work endured.

## Interpretation

This large cohort study is the first study to demonstrate the impact of change in level of support on mental health outcomes in HCPs over time. It demonstrates that, during the COVID-19 pandemic, HCPs and non-HCPs who felt supported at baseline (compared with those who felt unsupported) had a significantly lower risk (odds) of presence of generalized anxiety disorder, clinical insomnia, major depressive disorder, emotional exhaustion, depersonalization, and below-average wellbeing. This association was also observed at follow-up (albeit borderline significance for generalized anxiety disorder), more than four months after baseline, demonstrating consistency and reliability in these findings. Importantly, to our knowledge, this is the first study to report associations between changes in perceived level of workplace support and changes in mental health symptoms in HCPs over time during the pandemic: we show that those who felt more supported at the workplace (vs the level of support at baseline) at the follow-up survey improvement in perceived support was significantly had significantly associated with improved scores on all mental health outcomes assessed measures of generalized anxiety disorder, major depressive disorder, and wellbeing (independent of baseline perceived level of support), but not for insomnia or burnout, compared to those who felt workplace support to have reduced from the baseline. Furthermore, This finding indicates the important causal association between workplace support and mental health of professionals. Importantly, this association was consistent regardless of the baseline level of support an

1 individual received. Given that most participants in this study were HCPs, we discuss these  
 2 findings in the light of improving mental health in the healthcare workforce. ~~a~~ Another unique  
 3 aspect of this study is the rich qualitative data illustrating what qualities of workplace support  
 4 are perceived by HCPs to be helpful during the pandemic. This inclusion of qualitative data  
 5 can inform the design of intervention studies to establish a causal relationship between  
 6 workplace support and mental health.

7 the central role of managerial and workplace support in the mental health of HCPs. Managerial  
 8 support in all its forms – team leaders, supervisors, line managers, senior managers, trust leaders  
 9 (hospital chief executives), and the NHS (healthcare management organisations) itself was  
 10 perceived as integral to HCPs wellbeing.

11 ~~We found high prevalence of various mental health outcomes amongst HCPs and non-HCPs,~~  
 12 ~~which are similar to the prevalence of depression and anxiety in the UK general population~~  
 13 ~~during the pandemic,<sup>(34)</sup> but appear markedly lower than in Northern Irish health and social~~  
 14 ~~care professionals for depression, anxiety, and insomnia.<sup>(35)</sup> Moreover, the prevalence rates at~~  
 15 ~~baseline and four months later for generalized anxiety disorder and major depressive disorder~~  
 16 ~~are similar to those obtained during April to June 2020 in NHS workers in London (23.2% for~~  
 17 ~~generalized anxiety disorder and 27.3% for major depressive disorder).<sup>(6)</sup>~~

18 This study builds on and validates the hypothesis generated by a few recent cross-sectional  
 19 studies showing associations between workplace/~~occupational~~ support and mental health  
 20 outcomes in HCPs during the current pandemic,<sup>(21, 22, 34)</sup> and previous ~~SARS~~ outbreaks.<sup>(35)</sup>  
 21 While a small cohort study in routine work environment has shown that level of ~~social support~~  
 22 ~~(co-workers and managerial support)~~ is inversely associated with general mental distress,<sup>(36)</sup>  
 23 we have not found any studies – in routine or pandemic settings - that have evaluated the ~~causal~~  
 24 ~~and~~ prospective relationship between perceived improved workplace support and ~~different~~  
 25 ~~mental health outcomes~~ changes in mental health, wellbeing, and burnout. ~~A novel aspect is our~~  
 26 ~~demonstration that improved support is associated with significantly improved mental health~~  
 27 ~~outcomes, independent of baseline level of support. This has immense bearing on mitigating~~  
 28 ~~the loss of trained HCPs to adverse mental health impact. Whilst targeting those at increased~~  
 29 ~~risk of mental health impact (perhaps those who are patient facing) is a reasonable strategy, our~~  
 30 ~~findings highlight the importance of persisting with overall efforts targeting all groups~~  
 31 ~~regardless of support and satisfaction level.~~

1 Most policy and guidance suggest a benefit of improving workplace support on general mental  
 2 health, and indeed our findings support this notion regarding depression, anxiety, and wellbeing  
 3 in HCPs. However, whilst we observe a trend between change in perceived level of support  
 4 and insomnia and burnout scores over time, these associations were non-significant for these  
 5 domains. This highlights the relevance of improvements in perceived workplace support to  
 6 distinct mental health issues, and we speculate that other workplace factors which are not  
 7 accounted for in this analysis (e.g. long working hours) are more likely to impact on burnout  
 8 and insomnia.

9 Regarding our qualitative findings, these data, our findings are consistent with previous  
 10 workplace guidance for healthcare systems. The WHO has advised how HCPs and their  
 11 managers can promote their psychosocial wellbeing during the COVID-19 pandemic: taking  
 12 care of basic needs, ensuring staff communication is up-to-date and of high quality, use of  
 13 buddy systems, psychological first aid, and ensuring staff access to mental health support  
 14 services.<sup>(37)</sup> Our findings also mirror previous reviews stating that clear communication  
 15 through horizontal (peer-peer) and vertical (managers/trusts-employees) networks can buffer  
 16 against the psychological impact.<sup>(26)</sup> ~~Our findings support the notion that managerial/workplace~~  
 17 ~~support improves mental health in HCPs, and mirror previous reviews stating that clear~~  
 18 ~~communication through horizontal (peer-peer) and vertical (managers/trusts-employees)~~  
 19 ~~networks can buffer against the psychological impact.~~<sup>(26)</sup> ~~Additionally, we recommend that~~  
 20 ~~organisations actively encourage employees to engage with external sources of support,~~  
 21 ~~including family and friends, exercise, faith, and spiritual support.~~

22 Many participants also reported daily updates being useful ~~and desired them~~ as a means of  
 23 support. In the UK, Enabling Quality Improvement in Practice encourages embedding daily  
 24 huddles into work practice with the goal of safety and improvement ~~-. w~~ We suggest these daily  
 25 huddles should include a wellbeing ‘check-in’ element ~~, to improve work practices.~~

26 Intrinsic to workplace support is the support for managers themselves ~~- which was reflected by~~  
 27 ~~a few comments in our qualitative data (this was also identified in the ‘managerial support’ sub-~~  
 28 ~~theme). These changes require a culture shift within organisations which may not be quickly~~  
 29 ~~achieved.~~ PP Previous qualitative work highlighted how managerial support was integral to more  
 30 positive workplace experience during the Ebola epidemic, but also managerial stress was  
 31 reflected onto the HCPs.<sup>(38)</sup> Therefore, we must consider the potential impact of managerial



1 mental health on the quality of support delivered to employees, which was not explicitly  
 2 examined in our survey.

3 There are some limitations to this study. First, the data was collected between July and  
 4 December 2020, at the trough and second peak of the UK COVID-19 pandemic, respectively.  
 5 Despite the pandemic still ongoing, our findings remain highly relevant due to the rising  
 6 fluctuating levels of cases and increasing-persistent mental health burden in HCPs. Secondly,  
 7 while we account for the time since COVID-19 peak in participants' region, non-UK  
 8 participants may have experienced varying public health policies which may be a confounder.  
 9 Third, there is potential selection bias because our survey was accessible online only, and  
 10 Therefore, it is arguable that those who responded to the baseline and follow-up surveys  
 11 respondents -may not be representative of all HCPs (those with self-identified female gender  
 12 and white ethnicity were more likely to respond to the follow-up survey). However, our  
 13 observed prevalence-rates offer mental health conditions-outcomes are similar to other large  
 14 surveys in the UK general population,<sup>(39)</sup> and no significant differences were observed for  
 15 mental health between baseline-only and follow-up (cohort) participants, therefore we  
 16 anticipate our cohort findings to be generalisable to the healthcare and wider-workforce  
 17 regardless of the-possible self-selection when opting to participate or not in this studybias.  
 18 Fourth, another possible limitation is that our follow-up participants are less than half of the  
 19 number of participants at baseline. Those who responded at follow-up have similar age,  
 20 education, and relationship background, but those with self-identified female gender and white  
 21 ethnicity were more likely to respond to the follow-up survey. Fourth, the issue of  
 22 bidirectionality remains relevant despite reporting data at two time points: HCPs with lower  
 23 mental health may perceive workplace support to be lower because their needs are greater.  
 24 Despite this, we believe that participants primarily rate their level of support based on their  
 25 observations of the available support strategies in the workplace. Finally, most free text  
 26 responses were generated from a double-barrelled question asking what support was useful and  
 27 what was desired. This does not invalidate the themes generated but we are unable to concretely  
 28 distinguish between what support was helpful and what was lacking.

29 In conclusion, we demonstrate a consistent association between perceived level of workplace  
 30 support and the mental health and wellbeing of HCPs during the pandemic-and non-HCPs.  
 31 Improved perceived workplace support was associated with improved scores on mental health  
 32 measuresanxiety, depression, and wellbeing measures over time (Supplementary Figure 3)but  
 33 was not associated with insomnia or burnout. Further studies are required to understand the

1 workplace factors associated with insomnia and burnout in HCPs during the pandemic, and to  
 2 understand the causal relationship between perceived workplace support and mental health in  
 3 HCPs. Our findings are likely to inform significant changes in ~~further~~ guidance and national  
 4 policies targeted at improving wellbeing ~~of both in~~ HCPs ~~and non-HCPs~~ during the current and  
 5 future pandemics.

#### 6 **Declaration of interests:**

7 AKG (chief investigator and corresponding author) declares that CoPE-HCP study received  
 8 part funding from Barts Charity, and declares no other conflict of interest.

#### 9 **Authors contributions:**

10 AKG is the chief investigator and corresponding author for this study had access to all of the  
 11 data in the study and takes full responsibility for the integrity of the data and the accuracy of  
 12 the data analysis. Below are the detailed author contributions

13 Conceptualization: AKG, VK, MYK, JG, IS, CM, SN

14 Data curation: AKG, TG, GC

15 Formal analysis: AKG, TG, JG, IS, IM, CK, GC

16 Funding acquisition: AKG, VK

17 Resources and software: AKG, TG

18 Supervision: AKG

19 Investigation: *all authors and investigators*

20 Methodology: AKG, VK, MYK, JG, IS, CM, SN, RK, SA

21 Project administration: AKG, GC

22 Writing original draft: IS, JG, AKG, IM, CK, TG, GC

23 Writing-review and editing: *all authors and investigators*

#### 24 **Funding**

25 Barts Charity.

#### 26 ***Role of funding source***

1  
2  
3 1 The funders had no role in the study design, data collection, data analysis, data interpretation,  
4 2 or writing of the report.

7 3 ***Patient and public involvement***

9  
10 4 No patients or members of the public were directly involved with the design, or conduct, or  
11 5 reporting, or dissemination plans of the research.

13  
14 6 **Data sharing statement**

15  
16 7 Anonymised data, data dictionary, and survey materials will be made available upon request.  
17 8 Study protocol is available at <https://doi.org/10.3389/fpsyg.2021.616280>.

19  
20 9 **Acknowledgements:**

21  
22  
23 10 We would like to acknowledge the extensive support received from the Barts Education  
24 11 Academy and William Harvey Research Institute for sharing some of their resources needed  
25 12 to conduct this study. In particular, we wish to acknowledge the excellent contribution of the  
26 13 following: Julekha Khanam from Barts Health NHS Trust, Elaine Colaco and Martyn Clark  
27 14 from Barts Education Academy, Tania Toma from Imperial College Healthcare NHS Trust,  
28 15 and Ade Alele, Professor Mark Caulfield, and Amrita Ahluwalia from William Harvey  
29 16 Research Institute.

31  
32  
33  
34  
35 17 **Transparency declaration:**

36  
37  
38 18 **AGKG** (the manuscript's guarantor) affirms that the manuscript is an honest, accurate, and  
39 19 transparent account of the study being reported; that no important aspects of the study have  
40 20 been omitted; and that any discrepancies from the study as planned (and, if relevant,  
41 21 registered) have been explained.

## References

1. Stuijzand S, Deforges C, Sandoz V, Sajin C-T, Jaques C, Elmers J, et al. Psychological impact of an epidemic/pandemic on the mental health of healthcare professionals: a rapid review. *BMC Public Health*. 2020;20:1-18.
2. Holmes EA, O'Connor RC, Perry VH, Tracey I, Wessely S, Arseneault L, et al. Multidisciplinary research priorities for the COVID-19 pandemic: a call for action for mental health science. *Lancet Psychiatry*. 2020;7(6):547-60.
3. Li Z, Ge J, Yang M, Feng J, Qiao M, Jiang R, et al. Vicarious traumatization in the general public, members, and non-members of medical teams aiding in COVID-19 control. *Brain Behav Immun*. 2020;88:916-9.
4. Wang Z, Harold KG, Tong Y, Wen J, Sui M, Liu H, et al. Moral injury in Chinese health professionals during the COVID-19 pandemic. *Psychological Trauma: Theory, Research, Practice, and Policy*. 2021;Advance on.
5. Zerach G, Levi-Belz Y. Moral injury and mental health outcomes among Israeli health and social care workers during the COVID-19 pandemic: a latent class analysis approach. *European journal of psychotraumatology*. 2021;12.
6. Lamb D, Gnanapragasam S, Greenberg N, Bhundia R, Carr E, Hotopf M, et al. Psychosocial impact of the COVID-19 pandemic on 4378 UK healthcare workers and ancillary staff: initial baseline data from a cohort study collected during the first wave of the pandemic. *Occupational and Environmental Medicine*. 2021;0:1-8.
7. Plouffe RA, Nazarov A, Forchuk CA, Gargala D, Deda E, Le T, et al. Impacts of morally distressing experiences on the mental health of Canadian health care workers during the COVID-19 pandemic. *Eur J Psychotraumatol*. 2021;12(1):1984667.
8. Shanafelt T, Ripp J, Trockel M. Understanding and Addressing Sources of Anxiety Among Health Care Professionals During the COVID-19 Pandemic. *JAMA*. 2020;323:2133-4.
9. Yang Y, Lu L, Chen T, Ye S, Kelifa MO, Cao N, et al. Healthcare Worker's Mental Health and Their Associated Predictors During the Epidemic Peak of COVID-19. *Psychol Res Behav Manag*. 2021;14:221-31.
10. Raoofi S, Kan FP, Rafiei S, Khani S, Hosseiniard H, Tajik F, et al. Anxiety during the COVID-19 pandemic in hospital staff: systematic review plus meta-analysis. *BMJ Supportive & Palliative Care*. 2021;0:1-9.
11. Olaya B, Pérez-Moreno M, Bueno-Notivol J, Gracia-García P, Lasheras I, Santabárbara J. Prevalence of Depression among Healthcare Workers during the COVID-19 Outbreak: A Systematic Review and Meta-Analysis. *Journal of Clinical Medicine*. 2021;10:3406.
12. Prasad K, McLoughlin C, Stillman M, Poplau S, Goelz E, Taylor S, et al. Prevalence and correlates of stress and burnout among U.S. healthcare workers during the COVID-19 pandemic: A national cross-sectional survey study. *EClinicalMedicine*. 2021;35.
13. Brooks SK, Dunn R, Amlôt R, Rubin GJ, Greenberg N. A Systematic, Thematic Review of Social and Occupational Factors Associated with Psychological Outcomes in Healthcare Employees during an Infectious Disease Outbreak. *Journal of Occupational and Environmental Medicine*. 2018;60:248-57.
14. Siddiqui I, Aurelio M, Gupta A, Blythe J, Khanji M. COVID-19: Causes of anxiety and wellbeing support needs of healthcare professionals in the UK: A cross-sectional survey. *Clinical Medicine*. 2021;21:66-72.
15. Billings J, Seif NA, Hegarty S, Ondruskova T, Soulios E, Bloomfield M, et al. What support do frontline workers want? A qualitative study of health and social care workers' experiences and views of psychosocial support during the COVID-19 pandemic. *PLoS ONE*. 2021;16:e0256454.
16. Kang B-A, Kwon S, You M, Lee H. Perceived sources of occupational burn-out and embitterment among front-line health workers for COVID-19 control in Gyeonggi province, South Korea: a qualitative study. *Occupational and Environmental Medicine*. 2021;0:1-8.

17. Vera San Juan N, Aceituno D, Djellouli N, Sumray K, Regenold N, Syversen A, et al. Mental health and well-being of healthcare workers during the COVID-19 pandemic in the UK: contrasting guidelines with experiences in practice. *BJPsych Open*. 2020;7(1):e15.
18. Berkhout SG, Sheehan KA, Abbey SE. Individual- and Institutional-level Concerns of Health Care Workers in Canada During the COVID-19 Pandemic: A Qualitative Analysis. *JAMA Netw Open*. 2021;4(7):e2118425.
19. Buckley L, Berta W, Cleverley K, Widger K. Exploring Pediatric Nurses' Perspectives on Their Work Environment, Work Attitudes, and Experience of Burnout: What Really Matters? *Front Pediatr*. 2022;10:851001.
20. Khajuria A, Tomaszewski W, Liu Z, Chen J-h, Mehdian R, Fleming S, et al. Workplace factors associated with mental health of healthcare workers during the COVID-19 pandemic: an international cross-sectional study. *BMC Health Services Research*. 2021;21:1-11.
21. Cyr S, Marcil M-J, Marin M-F, Tardif J-C, Guay S, Guertin M-C, et al. Factors Associated With Burnout, Post-traumatic Stress and Anxio-Depressive Symptoms in Healthcare Workers 3 Months Into the COVID-19 Pandemic: An Observational Study. *Frontiers in Psychiatry*. 2021;12:668278.
22. Wanigasooriya K, Palimar P, Naumann DN, Ismail K, Fellows JL, Logan P, et al. Mental health symptoms in a cohort of hospital healthcare workers following the first peak of the COVID-19 pandemic in the UK. *BJPsych Open*. 2021;7(1).
23. Munn LT, Liu TL, Swick M, Rose R, Broyhill B, New L, et al. Original Research: Well-Being and Resilience Among Health Care Workers During the COVID-19 Pandemic: A Cross-Sectional Study. *Am J Nurs*. 2021;121(8):24-34.
24. Havaei F, Ma A, Staempfli S, MacPhee M. Nurses' Workplace Conditions Impacting Their Mental Health during COVID-19: A Cross-Sectional Survey Study. *Healthcare (Basel)*. 2021;9(1).
25. Hines SE, Chin KH, Glick DR, Wickwire EM. Trends in Moral Injury, Distress, and Resilience Factors among Healthcare Workers at the Beginning of the COVID-19 Pandemic. *International Journal of Environmental Research and Public Health*. 2021;18:488.
26. Pollock A, Campbell P, Cheyne J, Cowie J, Davis B, McCallum J, et al. Interventions to support the resilience and mental health of frontline health and social care professionals during and after a disease outbreak, epidemic or pandemic: a mixed methods systematic review. *Cochrane Database Syst Rev*. 2020;11:CD013779.
27. Khanji MY, Maniero C, NG S, Siddiqui I, Gupta J, Crosby L, et al. Early and Mid-Term Implications of the COVID-19 Pandemic on the Physical, Behavioral and Mental Health of Healthcare Professionals: The CoPE-HCP Study Protocol. *Frontiers in Psychology*. 2021;12:39.
28. Spitzer RL, Kroenke K, Williams JB, Lowe B. A brief measure for assessing generalized anxiety disorder: the GAD-7. *Arch Intern Med*. 2006;166(10):1092-7.
29. Morin CM, Belleville G, Belanger L, Ivers H. The Insomnia Severity Index: psychometric indicators to detect insomnia cases and evaluate treatment response. *Sleep*. 2011;34(5):601-8.
30. Kroenke K, Spitzer RL, Williams JB. The PHQ-9: validity of a brief depression severity measure. *J Gen Intern Med*. 2001;16(9):606-13.
31. Li-Sauerwine S, Rebillot K, Melamed M, Addo N, Lin M. A 2-Question Summative Score Correlates with the Maslach Burnout Inventory. *Western Journal of Emergency Medicine*. 2020;21:617.
32. Tennant R, Hiller L, Fishwick R, Platt S, Joseph S, Weich S, et al. The Warwick-Edinburgh Mental Well-being Scale (WEMWBS): development and UK validation. *Health Qual Life Outcomes*. 2007;5:63.
33. Braun V, Clarke V. Using thematic analysis in psychology. *Qualitative Research in Psychology*. 2006;3:77-101.
34. Khajuria A, Tomaszewski W, Liu Z, Chen J-h, Mehdian R, Fleming S, et al. Workplace factors associated with mental health of healthcare workers during the COVID-19 pandemic: an international cross-sectional study. *BMC Health Services Research* 2021;21:1-11.

1  
2  
3  
4  
5  
6  
7  
8  
9  
10  
11  
12  
13  
14  
15  
16  
17  
18  
19  
20  
21  
22  
23  
24  
25  
26  
27  
28  
29  
30  
31  
32  
33  
34  
35  
36  
37  
38  
39  
40  
41  
42  
43  
44  
45  
46  
47  
48  
49  
50  
51  
52  
53  
54  
55  
56  
57  
58  
59  
60

1 35. Preti E, Di Mattei V, Perego G, Ferrari F, Mazzetti M, Taranto P, et al. The Psychological  
2 Impact of Epidemic and Pandemic Outbreaks on Healthcare Workers: Rapid Review of the Evidence.  
3 Current Psychiatry Reports. 2020;22:1-22.  
4 36. Sconfienza C, Lindfors P, Lantz Friedrich A, Sverke M. Social support at work and mental  
5 distress: A three-wave study of normal, reversed, and reciprocal relationships. J Occup Health.  
6 2019;61(1):91-100.  
7 37. Mental health and psychosocial considerations during the COVID-19 outbreak [press  
8 release]. World Health Organization2020.  
9 38. Belfroid E, Steenbergen Jv, Timen A, Ellerbroek P, Huis A, Hulscher M. Preparedness and the  
10 importance of meeting the needs of healthcare workers: a qualitative study on Ebola. Journal of  
11 Hospital Infection. 2018;98:212-8.  
12 39. Shevlin M, McBride O, Murphy J, Miller JG, Hartman TK, Levita L, et al. Anxiety, depression,  
13 traumatic stress and COVID-19-related anxiety in the UK general population during the COVID-19  
14 pandemic. BJPsych Open. 2020;6.

Confidential

## Tables and Figures

**Table 1. Baseline characteristics of HCP and non-HCP group (n,1721)-**

|                                    | Response-                              | HCP, n, 1574 (%) | Non-HCP, n, 147 (%) | Overall, n, 1721 (%) |
|------------------------------------|----------------------------------------|------------------|---------------------|----------------------|
| <b>Age-</b>                        | 18-25 years-                           | 76 (4.8%)        | 8 (5.4%)            | 84 (4.9%)            |
|                                    | 26-35 years-                           | 390 (24.8%)      | 49 (33.3%)          | 439 (25.5%)          |
|                                    | 36-50 years-                           | 638 (40.5%)      | 56 (38.1%)          | 694 (40.3%)          |
|                                    | 51-60 years-                           | 372 (23.6%)      | 25 (17.0%)          | 397 (23.1%)          |
|                                    | 61-70 years-                           | 92 (5.8%)        | 7 (4.8%)            | 99 (5.8%)            |
|                                    | > 70 years-                            | 6 (0.4%)         | 2 (1.4%)            | 8 (0.5%)             |
| <b>Ethnicity-</b>                  | White-                                 | 1027 (65.3%)     | 109 (74.2%)         | 1136 (66.0%)         |
|                                    | Asian-                                 | 359 (22.8%)      | 25 (17.0%)          | 384 (22.3%)          |
|                                    | Black-                                 | 74 (4.7%)        | 4 (2.7%)            | 78 (4.5%)            |
|                                    | Mixed-                                 | 48 (3.1%)        | 3 (2.0%)            | 51 (3.0%)            |
|                                    | Other-                                 | 39 (2.5%)        | 3 (2.0%)            | 42 (2.4%)            |
|                                    | Prefer not to say-                     | 27 (1.7%)        | 3 (2.0%)            | 30 (1.7%)            |
| <b>Gender identity-</b>            | Female-                                | 1105 (70.2%)     | 109 (74.2%)         | 1214 (70.5%)         |
|                                    | Male-                                  | 447 (28.4%)      | 36 (24.5%)          | 483 (28.1%)          |
|                                    | Prefer not to say-                     | 14 (0.9%)        | 2 (1.4%)            | 16 (0.9%)            |
|                                    | Prefer to self-define-                 | 8 (0.5%)         | 0 (0.0%)            | 8 (0.5%)             |
| <b>Relationship status-</b>        | Divorced-                              | 54 (3.4%)        | 2 (1.4%)            | 56 (3.3%)            |
|                                    | Prefer not to say-                     | 46 (2.9%)        | 3 (2.0%)            | 49 (2.9%)            |
|                                    | Married/Living with partner or family- | 1048 (66.6%)     | 93 (63.3%)          | 1141 (66.3%)         |
|                                    | Other-                                 | 52 (3.3%)        | 8 (5.4%)            | 60 (4.0%)            |
|                                    | Single-                                | 374 (23.8%)      | 41 (27.9%)          | 415 (24.1%)          |
| <b>Number living in household</b>  | 1-                                     | 210 (13.3%)      | 17 (11.6%)          | 227 (13.2%)          |
|                                    | 2-                                     | 487 (30.9%)      | 55 (37.4%)          | 542 (31.5%)          |
|                                    | 3-5-                                   | 799 (50.8%)      | 68 (46.3%)          | 867 (50.4%)          |
|                                    | 6 or more-                             | 78 (5.0%)        | 7 (4.8%)            | 85 (4.9%)            |
| <b>Highest level of education-</b> | A-levels-                              | 113 (7.2%)       | 8 (5.4%)            | 121 (7.0%)           |
|                                    | Bachelor's / diploma-                  | 735 (46.7%)      | 36 (24.5%)          | 771 (44.8%)          |
|                                    | Master's / PhD-                        | 613 (39.0%)      | 102 (69.4%)         | 715 (41.6%)          |
|                                    | Other                                  | 113 (7.2%)       | 1 (0.7%)            | 114 (6.6%)           |

*Note.* HCP = healthcare professional. All demographic data is self-reported. 'Asian' category includes South Asian, Chinese, and any other Asian background. 'Mixed' category includes mixed Black and White, mixed Asian and White, and mixed any other/multiple ethnic backgrounds.

**Table 2. Managerial Support Sub-theme.**

|                                                             | <b>Description</b>                                                                                                                                                                                                                                                                                                                                                                                                                                                                                                                                    | <b>Quotes</b>                                                                                                                                                                                                                                                                                                                                                                                                                                              |
|-------------------------------------------------------------|-------------------------------------------------------------------------------------------------------------------------------------------------------------------------------------------------------------------------------------------------------------------------------------------------------------------------------------------------------------------------------------------------------------------------------------------------------------------------------------------------------------------------------------------------------|------------------------------------------------------------------------------------------------------------------------------------------------------------------------------------------------------------------------------------------------------------------------------------------------------------------------------------------------------------------------------------------------------------------------------------------------------------|
| <b>General support</b>                                      | The largest proportion of comments cited a need for general support from managers or its helpfulness.                                                                                                                                                                                                                                                                                                                                                                                                                                                 | <i>"Better support from direct supervisor" and "My line manager and supervisor as mentioned above was also of great support"</i>                                                                                                                                                                                                                                                                                                                           |
| <b>Communication</b>                                        | Many comments cited a general lack of communication, but some specified a lack and desire for: <ul style="list-style-type: none"> <li>• Regular contact and/or check-ins.</li> <li>• Clarity and speed with decisions.</li> <li>• Consistency in messages.</li> <li>• Honesty/Transparency.</li> </ul>                                                                                                                                                                                                                                                | <i>"Would have liked communication from our managers regarding the situation....."</i><br><br><i>"I would have appreciated if Management would have been open in regards to what's happening within the team ..... Everyone was scared that information has been kept secret ....."</i>                                                                                                                                                                    |
| <b>Visibility/ availability</b>                             | Staff felt there was a lack of managerial presence "on the ground", resulting in patient-facing staff feeling uncared for, disconnected with decision makers and that they lacked genuine understanding of the difficulties experienced.                                                                                                                                                                                                                                                                                                              | <i>"Felt top senior management/directors were not visible during the peak and now- highlighting a big disconnect between the realities of working on the shop floor and those making the decisions."</i>                                                                                                                                                                                                                                                   |
| <b>Understanding of personal circumstances/ flexibility</b> | Respondents appreciated managers who were understanding and flexible of personal circumstances.                                                                                                                                                                                                                                                                                                                                                                                                                                                       | <i>"More support from line managers, and flexibility in those initial days...."</i>                                                                                                                                                                                                                                                                                                                                                                        |
| <b>Genuine concern for welfare/ listening</b>               | Many comments regarding feeling dismissed and invalidated by managers when raising concerns or asking for support.<br><br>Of those who found managerial support helpful, the most common subtheme that emerged was having a genuine concern for staff welfare. Managers who listened and left staff feeling understood and with consistent support were valued.<br><br>Mirroring this, many respondents felt there was no recognition, acknowledgement or empathy for the increased stress levels and consequential personal and professional impact. | <i>"Upper management at the Trust ... had no idea about the hell happening on the ground. They were dismissive and almost acted like we were being outrageous when we raised concerns about poor quality patient care and concerns about our own health ..."</i><br><br><i>"I felt listened by my team and service management, which made me less anxious!"</i><br><br><i>"It would have been helpful to have those senior to myself.... listen ....."</i> |
| <b>Approachable/ helpful</b>                                | Support often cited as helpful was managers being approachable and solution-focused, available to talk to when needed and ensuring safety was prioritised.                                                                                                                                                                                                                                                                                                                                                                                            | <i>"Most helpful was having a manager who was always available and actively trying to improve the situation for us all, thinking of things to change before it needed changing etc. Very grateful"</i>                                                                                                                                                                                                                                                     |
| <b>Support for Managers from Trusts/local leadership</b>    | Staff also reported a desire for stronger local leadership and hospital management. Some respondents raised the problem of blame culture.<br><br>There were a handful of participants who were managers themselves, they felt there was no one to manage or support them.                                                                                                                                                                                                                                                                             | <i>"Organisationally there has increasingly been a culture of lack of protection and shifting blame to staff members"</i><br><br><i>"I am a partner &amp; senior manager. At the height of the crisis there was no one to take to about it. I and the other partners were constantly having to support the staff team. But there was no one for us to go to."</i>                                                                                          |



**Figure 1a.** Forest plot displaying the odds ratio (risk) of various mental health and burnout outcomes by perceived level of workplace support amongst all participants (n,1721; HCPs and non-HCPs) at baseline.

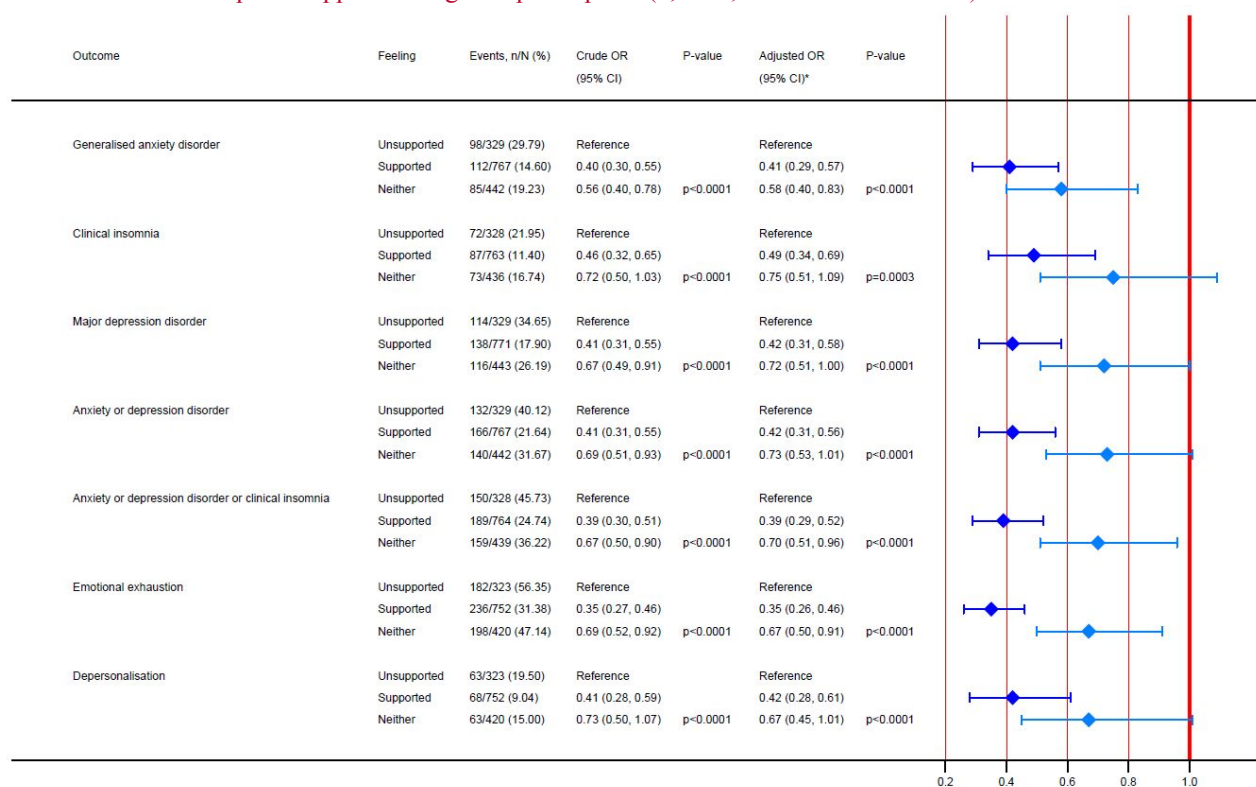

*Note.* Adjusted for age, gender, time elapsed since COVID-19 peak in subject's region, highest level of education, relationship status, number living in household, pre-existing mental health condition, and pre-existing physical health condition. P values are for global trend relating support to each outcome.

**Figure 1b.** Wellbeing outcomes (SWEMWBS) based on level of perceived support at baseline (n,1502).

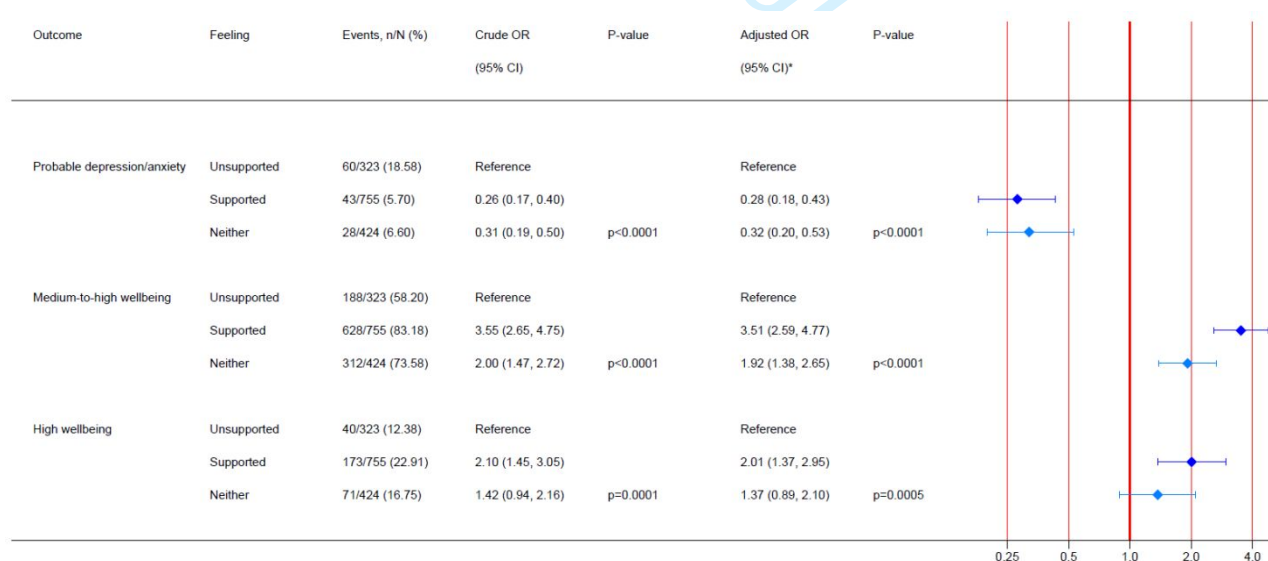

*Note.* Adjusted for age, gender, time elapsed since COVID-19 peak in subject's region, highest level of education, relationship status, number living in household, pre-existing mental health condition, and pre-existing physical health condition. P values are for global trend relating support to each outcome.

**Figure 2a.** Forest plot displaying the odds ratio (risk) of various mental health and burnout outcomes by perceived level of workplace support amongst all participants (n,799; HCPs and non-HCPs) at follow-up.

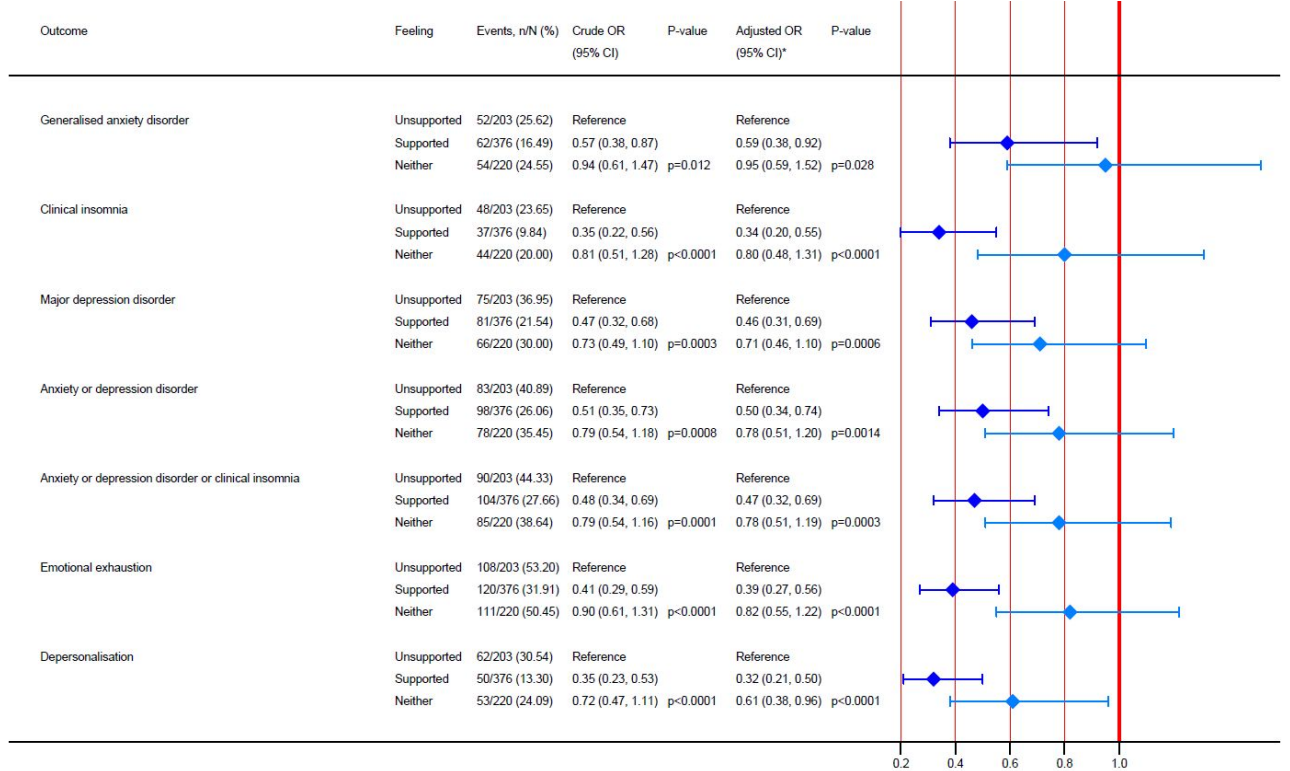

*Note.* Adjusted for age, gender, time elapsed since COVID-19 peak in subject's region, highest level of education, relationship status, number living in household, pre-existing mental health condition, and pre-existing physical health condition. P values are for global trend relating support to each outcome.

**Figure 2b.** Wellbeing outcomes (SWEMWBS) based on level of perceived support at follow-up (n,799).

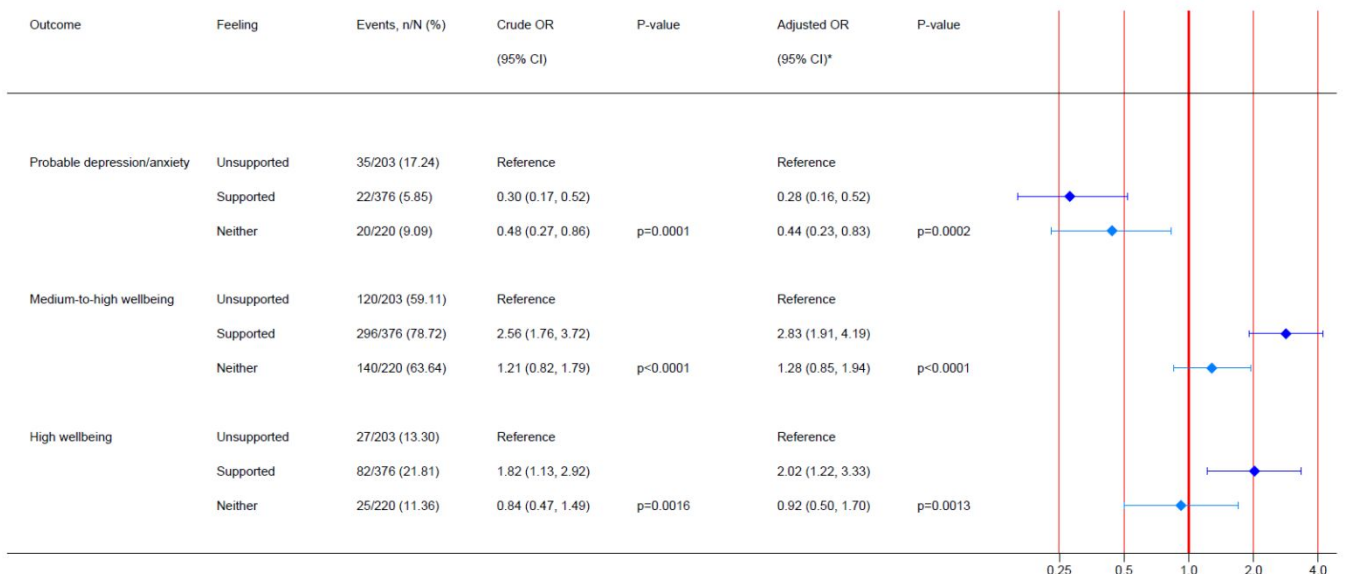

*Note.* Adjusted for age, gender, time elapsed since COVID-19 peak in subject's region, highest level of education, relationship status, number living in household, pre-existing mental health condition, and pre-existing physical health condition. P values are for global trend relating support to each outcome.

**Figure 3. Change in mental health and wellbeing outcomes between baseline and follow-up, by change in level of support reported at follow-up (n,771).**

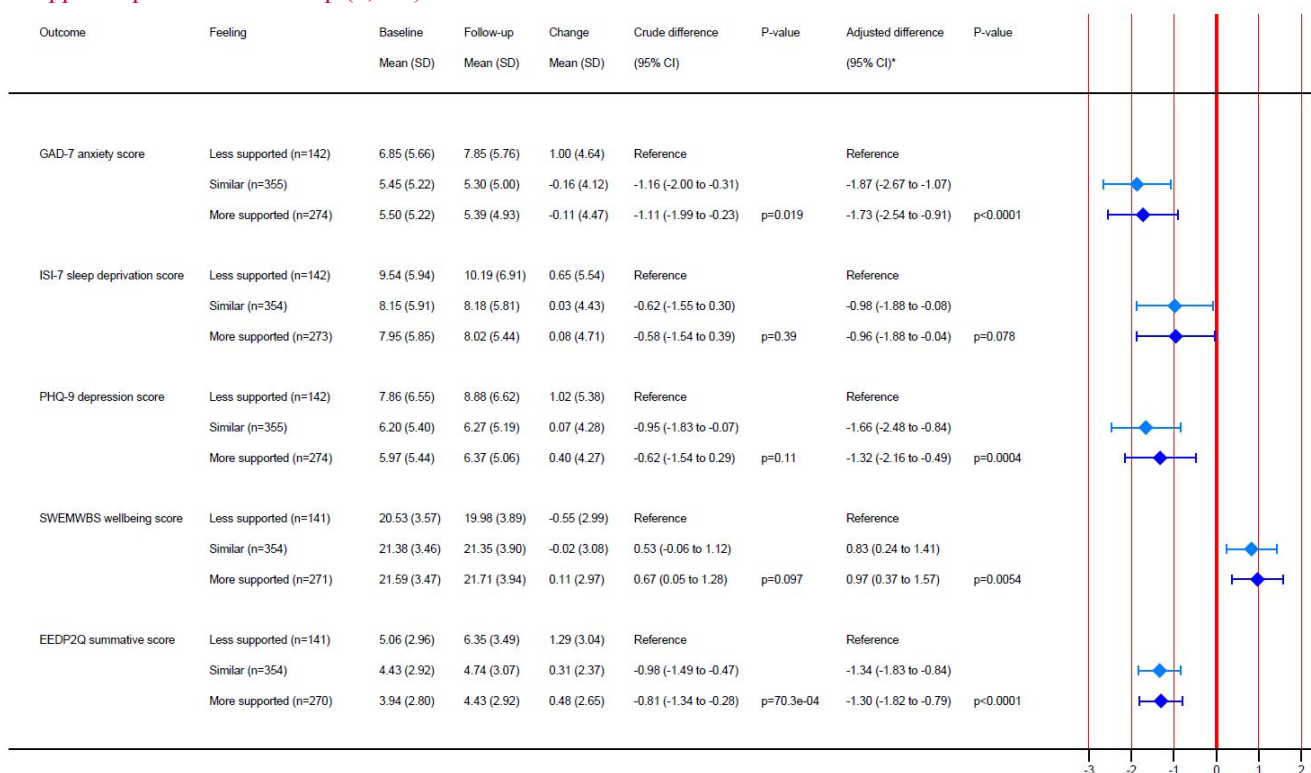

*Note.* Adjusted for baseline perceived level of support and baseline outcomes, age, gender, time since COVID peak in subject's region, level of education, number living in household, relationship status, pre-existing mental health condition, and pre-existing physical health condition. P values are for global trend relating change in level of support to mean scores on each outcome.

1 **Figure 4.** Results of thematic analysis (pictorial representation) of free-text entries from baseline survey

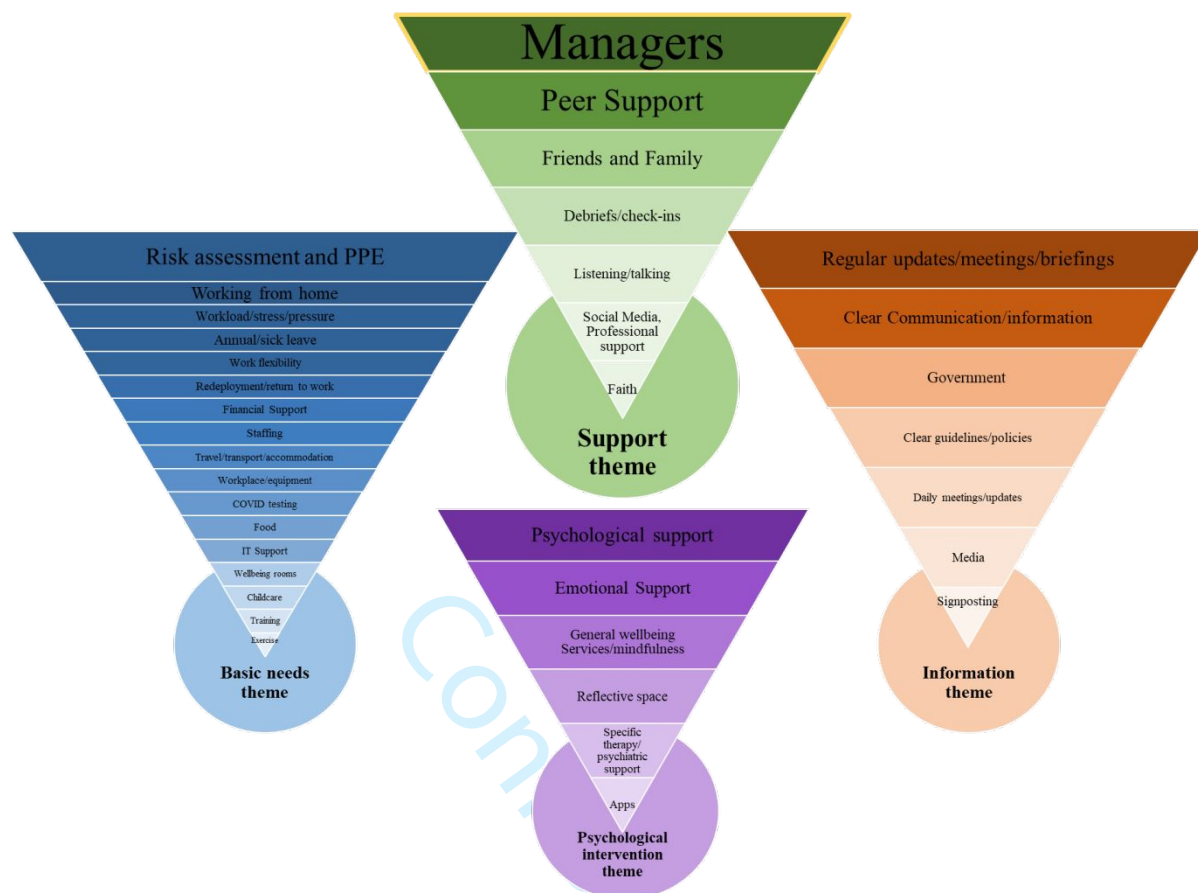

2  
3  
4  
5  
6  
7  
8  
9  
10  
11  
12  
13  
14  
15  
16  
17  
18  
19  
20  
21  
22  
23  
24  
25  
26  
27  
28  
29  
30  
31  
32  
33  
34  
35  
36  
37  
38  
39  
40  
41  
42  
43  
44  
45  
46  
47  
48  
49  
50  
51  
52  
53  
54  
55  
56  
57  
58  
59  
60

*Note.* Colours of each theme correspond with themes detailed in Supplementary Table 2. The inverted pyramids indicate the size of the sub-theme, with the broadest section indicating larger themes. The gold outline around ‘Managers’ denotes largest sub-theme (See Table 2 for details). ‘Other support’ is omitted from this figure due to the limited number of subthemes and relative size of the theme.

**Table 1. Baseline characteristics of HCPs at baseline (n, 1574) and follow-up (n, 744).**

|                  | <u>Response</u>      | <u>Baseline (n, 1574) (%)</u> | <u>Follow-up (n, 744) (%)</u> |
|------------------|----------------------|-------------------------------|-------------------------------|
| <u>Age</u>       | <u>18-25 years</u>   | 76 (4.8)                      | 31 (4.2)                      |
| -                | <u>26-35 years</u>   | 390 (24.8)                    | 175 (23.5)                    |
| -                | <u>36-50 years</u>   | 638 (40.5)                    | 298 (40.1)                    |
| -                | <u>51-60 years</u>   | 372 (23.6)                    | 185 (24.9)                    |
| -                | <u>61-70 years</u>   | 92 (5.8)                      | 51 (6.9)                      |
| -                | <u>&gt; 70 years</u> | 6 (0.4)                       | 4 (0.5)                       |
| <u>Ethnicity</u> | <u>White</u>         | 1027 (65.3)                   | 587 (78.9)                    |
| -                | <u>Asian</u>         | 359 (22.8)                    | 93 (12.5)                     |
| -                | <u>Black</u>         | 74 (4.7)                      | 27 (3.6)                      |
| -                | <u>Mixed</u>         | 48 (3.1)                      | 19 (2.6)                      |
| -                | <u>Other</u>         | 39 (2.5)                      | 12 (1.6)                      |

|                                          |                                              |             |            |
|------------------------------------------|----------------------------------------------|-------------|------------|
|                                          | <u>Prefer not to say</u>                     | 27 (1.7)    | 6 (0.81)   |
| <b><u>Gender identity</u></b>            | <u>Female</u>                                | 1105 (70.2) | 562 (75.5) |
| -                                        | <u>Male</u>                                  | 447 (28.4)  | 178 (23.9) |
| -                                        | <u>Prefer not to say</u>                     | 14 (0.9)    | 3 (0.4)    |
| -                                        | <u>Prefer to self-define</u>                 | 8 (0.5)     | 1 (0.1)    |
| <b><u>Relationship status</u></b>        | <u>Divorced</u>                              | 54 (3.4)    | 27 (3.6)   |
| -                                        | <u>Prefer not to say</u>                     | 46 (2.9)    | 21 (2.8)   |
| -                                        | <u>Married/Living with partner or family</u> | 1048 (66.6) | 496 (66.7) |
| -                                        | <u>Other</u>                                 | 52 (3.3)    | 22 (3.0)   |
|                                          | <u>Single</u>                                | 374 (23.8)  | 178 (23.9) |
| <b><u>Number living in household</u></b> | <u>1</u>                                     | 210 (13.3)  | 104 (14.0) |
|                                          | <u>2</u>                                     | 487 (30.9)  | 252 (33.9) |
|                                          | <u>3-5</u>                                   | 799 (50.8)  | 367 (49.3) |
|                                          | <u>6 or more</u>                             | 78 (5.0)    | 21 (2.8)   |
| <b><u>Highest level of education</u></b> | <u>A-levels</u>                              | 113 (7.2)   | 61 (8.2)   |
| -                                        | <u>Bachelor's / diploma</u>                  | 735 (46.7)  | 346 (46.5) |
|                                          | <u>Master's / PhD</u>                        | 613 (39.0)  | 290 (39.0) |
|                                          | <u>Other</u>                                 | 113 (7.2)   | 47 (6.3)   |

*Note.* HCP = healthcare professional. All demographic data is self-reported. 'Asian' category includes South Asian, Chinese, and any other Asian background. 'Mixed' category includes mixed Black and White, mixed Asian and White, and mixed any other/multiple ethnic backgrounds.

1

2

**Table 2.** Separate linear regressions for the association between change in perceived level of support and change in raw mental health, burnout, and wellbeing scores in HCPs from baseline to follow-up (n, 681).

|                | Crude              |                                 |                   | Adjusted             |                                   |                   |
|----------------|--------------------|---------------------------------|-------------------|----------------------|-----------------------------------|-------------------|
|                | <u>Coefficient</u> | <u>95% Confidence Intervals</u> | <u>P Value</u>    | <u>Coefficient *</u> | <u>95% Confidence Intervals *</u> | <u>P value *</u>  |
| <u>GAD-7</u>   | <u>-0.10</u>       | <u>-0.21 to 0.01</u>            | <u>0.075</u>      | <u>-0.13</u>         | <u>-0.25 to -0.01</u>             | <u>0.036</u>      |
| <u>PHQ-9</u>   | <u>-0.19</u>       | <u>-0.30 to -0.08</u>           | <u>0.001</u>      | <u>-0.17</u>         | <u>-0.29 to -0.04</u>             | <u>0.008</u>      |
| <u>ISI</u>     | <u>-0.07</u>       | <u>-0.19 to 0.05</u>            | <u>0.226</u>      | <u>-0.13</u>         | <u>-0.26 to 0.01</u>              | <u>0.067</u>      |
| <u>EEDP2Q</u>  | <u>-0.05</u>       | <u>-0.12 to 0.01</u>            | <u>0.112</u>      | <u>-0.06</u>         | <u>-0.13 to 0.02</u>              | <u>0.139</u>      |
| <u>SWEMWBS</u> | <u>0.17</u>        | <u>0.08 to 0.27</u>             | <u>&lt; 0.001</u> | <u>0.19</u>          | <u>0.10 to 0.29</u>               | <u>&lt; 0.001</u> |

*Note.* Crude and adjusted coefficients provided.

\*adjusted for age, gender identity, education, relationship status, number living in household, currently diagnosed mental health condition, currently diagnosed physical health condition, role (medical doctor vs. HCAs, nurses, and AHPs), and baseline level of support.

1

**Table 3. Workplace support themes based on 681 responses from HCP only\* -entries.**

| <b>Theme</b>                                      | <b>Description</b>                                                                                                                                                                                                                                                                                            | <b>Quotes</b>                                                                                                                                                                                                                                                                                                                                                                                                                                                                                                                                                                                                                                 |
|---------------------------------------------------|---------------------------------------------------------------------------------------------------------------------------------------------------------------------------------------------------------------------------------------------------------------------------------------------------------------|-----------------------------------------------------------------------------------------------------------------------------------------------------------------------------------------------------------------------------------------------------------------------------------------------------------------------------------------------------------------------------------------------------------------------------------------------------------------------------------------------------------------------------------------------------------------------------------------------------------------------------------------------|
| <b><u>Concern/ understanding for welfare</u></b>  | Genuine concern for welfare.                                                                                                                                                                                                                                                                                  | <i>"Direct check in. How am I doing, and actually listen to the answer. I have been left to get on with it, with a few platitudes "Ohh its hard"."</i>                                                                                                                                                                                                                                                                                                                                                                                                                                                                                        |
|                                                   | <ul style="list-style-type: none"> <li>Managers who listened and left staff feeling understood and with consistent support were valued.</li> <li>A few comments citing check-ins and appropriate training from original line-managers as being significant to their mental health when redeployed.</li> </ul> | <p><i>"Would have wanted more recognition from management about impact and repercussions of redeployment but support from colleagues was good within the team."</i></p> <p><i>"I had no contact with my original team during my redeployment, I found this very stressful which increased my anxiety."</i></p>                                                                                                                                                                                                                                                                                                                                |
|                                                   | Flexibility and understanding.                                                                                                                                                                                                                                                                                | <i>"Better understanding of peoples personal situations. I am a full-time unpaid carer for partner who was told to shield for 12 weeks. Due to his condition (a Traumatic Brain Injury and Epilepsy) I was unable to leave him unsupervised for long periods of time as his seizures are fatal and in the event of one he needs medication administered to him to save his life...I requested to be able to work from home due these extenuating circumstances which was denied which caused me and my partner extreme stress...I think it needs to be looked at as a case by case basis and not as a staffing level or need as a whole."</i> |
|                                                   | Psychological support.                                                                                                                                                                                                                                                                                        | <i>"Wellbeing support with a named psychologist allocated to our team right from the start."</i>                                                                                                                                                                                                                                                                                                                                                                                                                                                                                                                                              |
|                                                   | <ul style="list-style-type: none"> <li>One-to-one confidential counselling and/or access to clinical psychologist was cited as useful for HCPs mental health.</li> </ul>                                                                                                                                      | <i>"I would have wanted one-on-one therapy sessions with an external professional. We were offered these with our own psychology department free of charge though often work closely with these individuals."</i>                                                                                                                                                                                                                                                                                                                                                                                                                             |
| <b><u>Information</u></b>                         | This broad theme generally describes HCPs requests for regular clear, consistent, and transparent communication/updates sent on a timely manner.                                                                                                                                                              | <i>"I found it really helpful to have daily or twice weekly staff team briefings with updates on PPE, procedures etc and a chance to ask questions. In the early part of the pandemic, one of the most stressful things was the sheer volume of information coming at us and constant changes to what we should be doing, what PPE we needed in which area etc."</i>                                                                                                                                                                                                                                                                          |
|                                                   | Participants sometimes cited daily staff briefings, regular bulletins, and daily huddles as being useful modes of communication.                                                                                                                                                                              | <i>"Better communication - it felt like as a nurse being redeployed that we were deliberately kept in the dark about operations surrounding Covid-19 as the trust management were more paranoid about details being leaked to the press than staff welfare."</i>                                                                                                                                                                                                                                                                                                                                                                              |
| <b><u>Tangible qualities of the workplace</u></b> | Adequate staffing                                                                                                                                                                                                                                                                                             | <i>"Not sure. Managing staff shortages was difficult and extra work needed. Now we have burnout from covering."</i>                                                                                                                                                                                                                                                                                                                                                                                                                                                                                                                           |
|                                                   | <ul style="list-style-type: none"> <li>Several comments describing ensuring adequate staffing in response to staff sicknesses and/or heightened workload, for example.</li> </ul>                                                                                                                             |                                                                                                                                                                                                                                                                                                                                                                                                                                                                                                                                                                                                                                               |
|                                                   | PPE/safety                                                                                                                                                                                                                                                                                                    | <i>"At the beginning of the pandemic, the PPE was rationed strictly and that caused a lot of anxiety. Those initial contacts with patient meant those staff member developed symptoms and got ill. This caused a lot of anxiety. I fortunately had annual leave for a week and when I got back to work. The PPE was fully available and in use appropriately. Scrubs were a problem especially plus sizes, not available."</i>                                                                                                                                                                                                                |
|                                                   | <ul style="list-style-type: none"> <li>Commonly reported describing training in how to use PPE, safety protocols (e.g. social distancing), regular testing, and access to appropriate PPE.</li> </ul>                                                                                                         |                                                                                                                                                                                                                                                                                                                                                                                                                                                                                                                                                                                                                                               |

|                            |                                                                                                                                                                                                                                                                                                                                                                                  |                                                                                                                                                                                                                                                                                                                                                                                                                                                                                                                                                                                       |
|----------------------------|----------------------------------------------------------------------------------------------------------------------------------------------------------------------------------------------------------------------------------------------------------------------------------------------------------------------------------------------------------------------------------|---------------------------------------------------------------------------------------------------------------------------------------------------------------------------------------------------------------------------------------------------------------------------------------------------------------------------------------------------------------------------------------------------------------------------------------------------------------------------------------------------------------------------------------------------------------------------------------|
|                            | <p><u>Financial support</u></p> <ul style="list-style-type: none"> <li>• E.g. free lunches, and free parking so HCPs can drive (and avoid public transport) and no additional expense.</li> </ul>                                                                                                                                                                                | <p><i>"Most helpful - being able to drive to and park at work. Food provided at work."</i></p> <p><i>"Free meals because there was no food in the shops and also I was so tired after my shift, I couldn't cook. Not having to wash my uniform. I know my manager was doing her best to keep the unit staffed and as safe as possible."</i></p>                                                                                                                                                                                                                                       |
|                            | <p><u>Work from home support</u></p> <ul style="list-style-type: none"> <li>• Few HCPs described support (in terms of IT equipment, software support to facilitate working from home as being significant).</li> </ul>                                                                                                                                                           | <p><i>"Not to have to pay back hours lost trying to work from home without necessary equipment needed to enable me to work from home effectively. Necessary equipment should have been provided."</i></p>                                                                                                                                                                                                                                                                                                                                                                             |
| <b><u>Leadership</u></b>   | <p><u>Visibility</u></p> <ul style="list-style-type: none"> <li>• Staff felt there was a lack of senior managerial presence "on the ground", resulting in patient-facing staff feeling uncared for, disconnected with decision makers and that they lacked genuine understanding of the difficulties experienced.</li> </ul>                                                     | <p><i>"Felt top senior management/directors were not visible during the peak and now- highlighting a big disconnect between the realities of working on the shop floor and those making the decisions."</i></p>                                                                                                                                                                                                                                                                                                                                                                       |
|                            | <p><u>Available/approachable</u></p> <ul style="list-style-type: none"> <li>• Few brief comments expressing gratitude for their managers/supervisors being approachable.</li> <li>• Few comments relating to being glad that supervisors were available to help, or the availability of wellbeing support services.</li> </ul>                                                   | <p><i>"Most helpful was having a manager who was always available and actively trying to improve the situation for us all, thinking of things to change before it needed changing etc. Very grateful."</i></p>                                                                                                                                                                                                                                                                                                                                                                        |
|                            | <p><u>Reassurance</u></p> <ul style="list-style-type: none"> <li>• Few comments highlight the significance of receiving reassurance from their managers regarding tasks and patient care, and reassurance regarding redeployment or job security.</li> </ul>                                                                                                                     | <p><i>"I work in intensive care. We were told "to keep patients alive and anything you do extra is a bonus". This was very comforting to me as I know I will always do my best and more to reach on everything but was this statement by our matron made me feel I could do my job to the best of my ability and not live with the guilt that I hadn't reached on certain things."</i></p>                                                                                                                                                                                            |
|                            | <p><u>Higher support for managers</u></p> <ul style="list-style-type: none"> <li>• Some participants who were managers themselves felt there was no-one to manage or support them.</li> </ul>                                                                                                                                                                                    | <p><i>"I am a partner &amp; senior manager. At the height of the crisis there was no one to take to about it. I and the other partners were constantly having to support the staff team. But there was no one for us to go to."</i></p>                                                                                                                                                                                                                                                                                                                                               |
| <b><u>Peer support</u></b> | <p>Peer support was frequently stated. This was usually described as helpful and comprised a sense of camaraderie, solidarity/unity, and being open with each other. Some participants appreciated eating lunch together with team and to have informal discussions regarding emotional support. More formal modes of discussion described Balint groups, in a couple cases.</p> | <p><i>"We are a team of 12 working in a "bubble". At the height of the pandemic we split into two teams and working alternate weeks. increased workload and very stressful but we all supported each other and ensured we were all coping!"</i></p> <p><i>"Mealtimes were really important. Meals were free and my manager ensured we all went together and ate lunch together. This seemed to brighten the day and we tried not to talk about work at lunch time. For other team members, she also requested they go back to the office before home time to have a debrief."</i></p> |

\*N = 860.



1 **Figure 1.** Flowchart for baseline and follow-up participants.

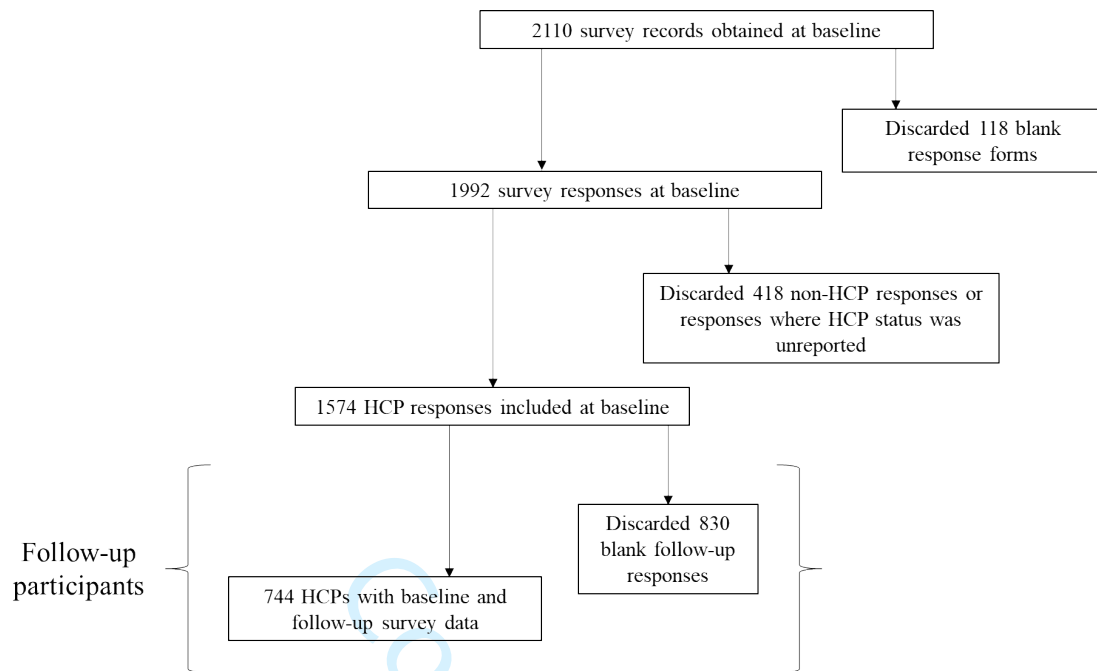

2  
3  
4  
5  
6

**Figure 2.** Forest plot displaying the odds ratio (risk) of various mental health and burnout outcomes by perceived level of workplace support amongst HCPs at baseline (n, 1422).



*Note.* Adjusted for age, gender, time elapsed since COVID-19 peak in subject's region, highest level of education, relationship status, number living in household, current mental health diagnosis, current physical health diagnosis, and role. P values are for global trend relating support to each outcome.

**Figure 3.** Forest plot displaying the odds ratio (risk) of various mental health and burnout outcomes by perceived level of workplace support amongst HCPs at follow-up (n, 681).



*Note.* Adjusted for age, gender, time elapsed since COVID-19 peak in subject's region, highest level of education, relationship status, number living in household, current mental health diagnosis, current physical health diagnosis, and role. P values are for global trend relating change in level of support to mean scores on each outcome.

1  
2  
3  
4  
5  
6  
7  
8  
9  
10  
11  
12  
13  
14  
15  
16  
17  
18  
19  
20  
21  
22  
23  
24  
25  
26  
27  
28  
29  
30  
31  
32  
33  
34  
35  
36  
37  
38  
39  
40  
41  
42  
43  
44  
45  
46

**Tables and Figures (Supplementary)**

**Supplemental Table 1.** Chi square analysis of demographic characteristics of baseline-only HCPs and cohort HCP participants (n = 1574)

|                                   | <u>Response</u>                            | <u>Baseline-only (n, 830) (%)</u> | <u>Follow-up (n, 744) (%)</u> | <u>Chi squared result</u>  |
|-----------------------------------|--------------------------------------------|-----------------------------------|-------------------------------|----------------------------|
| <b><u>Age</u></b>                 | <u>18-25 years</u>                         | <u>45 (5.4)</u>                   | <u>31 (4.2)</u>               | <u>6.5, p = 0.26</u>       |
| -                                 | <u>26-35 years</u>                         | <u>215 (25.9)</u>                 | <u>175 (23.5)</u>             |                            |
| -                                 | <u>36-50 years</u>                         | <u>340 (41.0)</u>                 | <u>298 (40.1)</u>             |                            |
| -                                 | <u>51-60 years</u>                         | <u>187 (22.5)</u>                 | <u>185 (24.9)</u>             |                            |
| -                                 | <u>61-70 years</u>                         | <u>41 (4.9)</u>                   | <u>51 (6.9)</u>               |                            |
| -                                 | <u>&gt; 70 years</u>                       | <u>2 (0.2)</u>                    | <u>4 (0.5)</u>                |                            |
| <b><u>Ethnicity</u></b>           | <u>White</u>                               | <u>440 (53.0)</u>                 | <u>587 (78.9)</u>             | <u>121.7, p &lt; 0.001</u> |
| -                                 | <u>Asian</u>                               | <u>266 (32.1)</u>                 | <u>93 (12.5)</u>              |                            |
| -                                 | <u>Black</u>                               | <u>47 (5.7)</u>                   | <u>27 (3.6)</u>               |                            |
| -                                 | <u>Mixed</u>                               | <u>29 (3.5)</u>                   | <u>19 (2.6)</u>               |                            |
| -                                 | <u>Other</u>                               | <u>27 (3.3)</u>                   | <u>12 (1.6)</u>               |                            |
| -                                 | <u>Prefer not to say</u>                   | <u>21 (2.5)</u>                   | <u>6 (0.81)</u>               |                            |
| <b><u>Gender identity</u></b>     | <u>Female</u>                              | <u>543 (65.4)</u>                 | <u>562 (75.5)</u>             | <u>23.3, p &lt; 0.001</u>  |
| -                                 | <u>Male</u>                                | <u>269 (32.4)</u>                 | <u>178 (23.9)</u>             |                            |
| -                                 | <u>Prefer not to say</u>                   | <u>11 (1.3)</u>                   | <u>3 (0.4)</u>                |                            |
| -                                 | <u>Prefer to self-define</u>               | <u>7 (0.8)</u>                    | <u>1 (0.1)</u>                |                            |
| <b><u>Relationship status</u></b> | <u>Divorced</u>                            | <u>27 (3.3)</u>                   | <u>27 (3.6)</u>               | <u>0.74, p = 0.95</u>      |
| -                                 | <u>Prefer not to say</u>                   | <u>25 (3.0)</u>                   | <u>21 (2.8)</u>               |                            |
| -                                 | <u>Married/Living w/ partner or family</u> | <u>552 (66.5)</u>                 | <u>496 (66.7)</u>             |                            |
| -                                 | <u>Other</u>                               | <u>30 (3.6)</u>                   | <u>22 (3.0)</u>               |                            |
| -                                 | <u>Single</u>                              | <u>196 (23.6)</u>                 | <u>178 (23.9)</u>             |                            |
| <b><u>Number living in</u></b>    | <u>1</u>                                   | <u>106 (12.8)</u>                 | <u>104 (14.0)</u>             | <u>17.9, p &lt; 0.001</u>  |

|                                   |                                     |                   |                   |                       |
|-----------------------------------|-------------------------------------|-------------------|-------------------|-----------------------|
| <b>household</b>                  | <u>2</u>                            | <u>235 (28.3)</u> | <u>252 (33.9)</u> |                       |
|                                   | <u>3-5</u>                          | <u>432 (52.1)</u> | <u>367 (49.3)</u> |                       |
|                                   | <u>6 or more</u>                    | <u>57 (6.9)</u>   | <u>21 (2.8)</u>   |                       |
| <b>Highest level of education</b> | <u>A-levels</u>                     | <u>52 (6.3)</u>   | <u>61 (8.2)</u>   | <u>3.52, p = 0.32</u> |
| -                                 | <u>Bachelor's / diploma</u>         | <u>389 (46.9)</u> | <u>346 (46.5)</u> |                       |
|                                   | <u>Master's / PhD</u>               | <u>323 (38.9)</u> | <u>290 (39.0)</u> |                       |
|                                   | <u>Other</u>                        | <u>66 (8.0)</u>   | <u>47 (6.3)</u>   |                       |
| <b>Mental health outcomes</b>     | <u>Major depressive disorder</u>    | <u>172 (23.9)</u> | <u>182 (25.5)</u> | <u>0.54, p = 0.46</u> |
| <b>at baseline*</b>               | <u>Generalised anxiety disorder</u> | <u>142 (19.8)</u> | <u>142 (19.9)</u> | <u>0.00, p = 0.97</u> |
|                                   | <u>Clinical insomnia</u>            | <u>103 (14.6)</u> | <u>125 (17.6)</u> | <u>2.31, p = 0.13</u> |
|                                   | <u>Emotional exhaustion</u>         | <u>298 (44.0)</u> | <u>282 (39.8)</u> | <u>2.41, p = 0.12</u> |
|                                   | <u>Depersonalisation</u>            | <u>103 (15.2)</u> | <u>83 (11.7)</u>  | <u>3.59, p = 0.06</u> |
|                                   | <u>High-medium wellbeing</u>        | <u>173 (25.3)</u> | <u>176 (24.8)</u> | <u>0.04, p = 0.84</u> |

Note. All demographic data is self-reported. 'Asian' category includes South Asian, Chinese, and any other Asian background. 'Mixed' category includes mixed Black and White, mixed Asian and White, and mixed any other/multiple ethnic backgrounds.

\*Missing data for each mental health outcome varies: 1434 participants (721 baseline-only and 713 follow-up) for major depressive disorder, 1429 (716 baseline-only and 713 follow-up) for generalised anxiety disorder, 1418 (706 baseline-only and 712 follow-up) for clinical insomnia, 1386 participants (678 baseline-only and 708 follow-up) for emotional exhaustion and depersonalisation, and 1393 (684 baseline-only and 709 follow-up) for wellbeing.

**Supplementary Table 2. Perceived level of support in HCPs at baseline (n, 1422) and follow-up (n, 681).**

|                                                                                         | Response                               | Baseline, n,1422 (%) | Follow-up, n,681 (%) |
|-----------------------------------------------------------------------------------------|----------------------------------------|----------------------|----------------------|
| Do you think you received adequate support directly from your supervisors/line managers | Felt unsupported                       | 312 (21.9%)          | 167 (24.5)           |
|                                                                                         | Felt supported                         | 689 (48.5%)          | 326 (47.9)           |
|                                                                                         | Felt neither supported nor unsupported | 421 (29.6%)          | 188 (27.6)           |

*Note.* Follow-up participants are those who also provided valid baseline support data.

**Supplemental Figure 1. Graphical illustration of the distribution of responses for perceived level of workplace support at baseline (n = 1422).**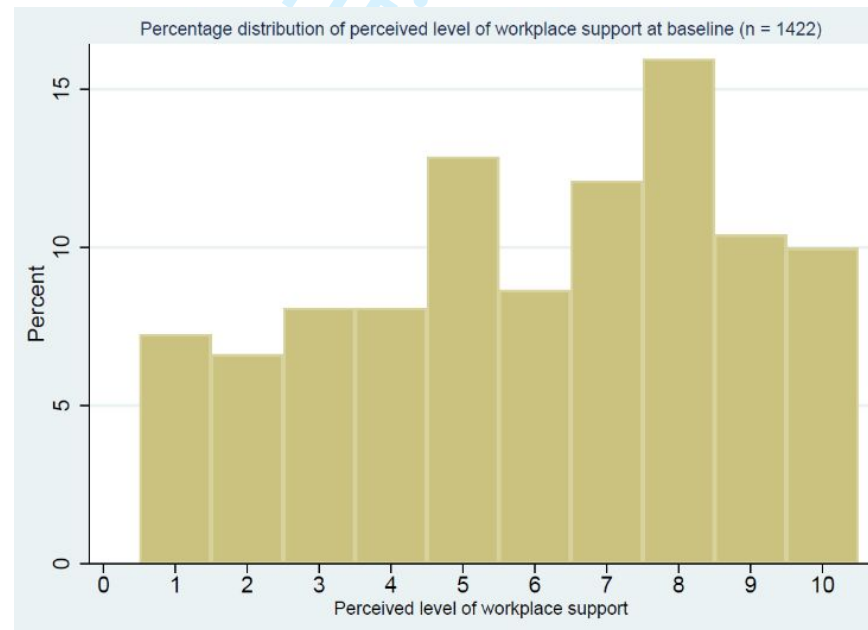

1  
2  
3  
4  
5  
6  
7  
8  
9  
10  
11  
12  
13  
14  
15  
16  
17  
18  
19  
20  
21  
22  
23  
24  
25  
26  
27  
28  
29  
30  
31  
32  
33  
34  
35  
36  
37  
38  
39  
40  
41  
42  
43  
44  
45  
46

**Supplemental Figure 2.** Graphical illustration of the distribution of responses for perceived level of workplace support at follow-up (n = 681).

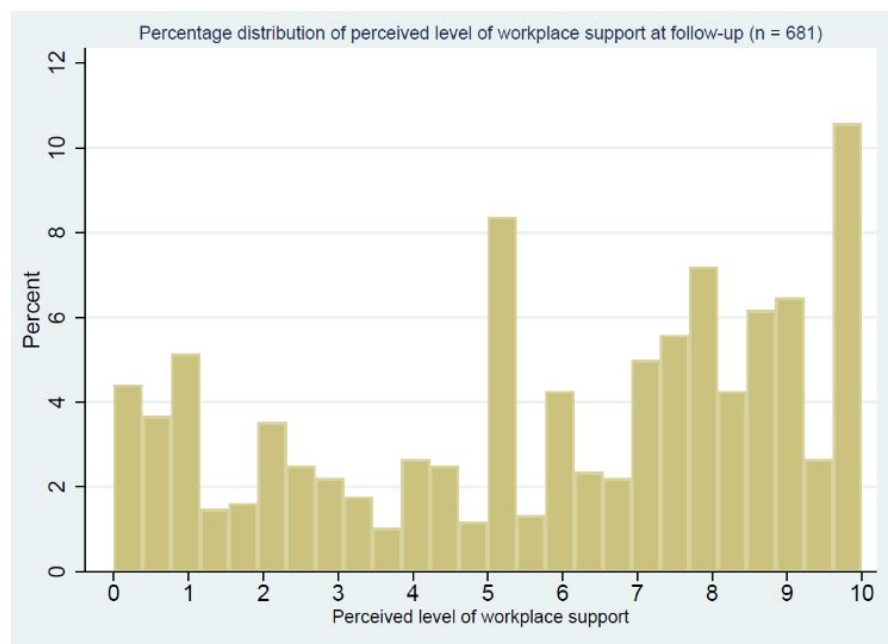

**Supplemental Figure 3.** Graphical illustration of the distribution of the change in perceived level of workplace support from baseline and follow-up (n = 681).

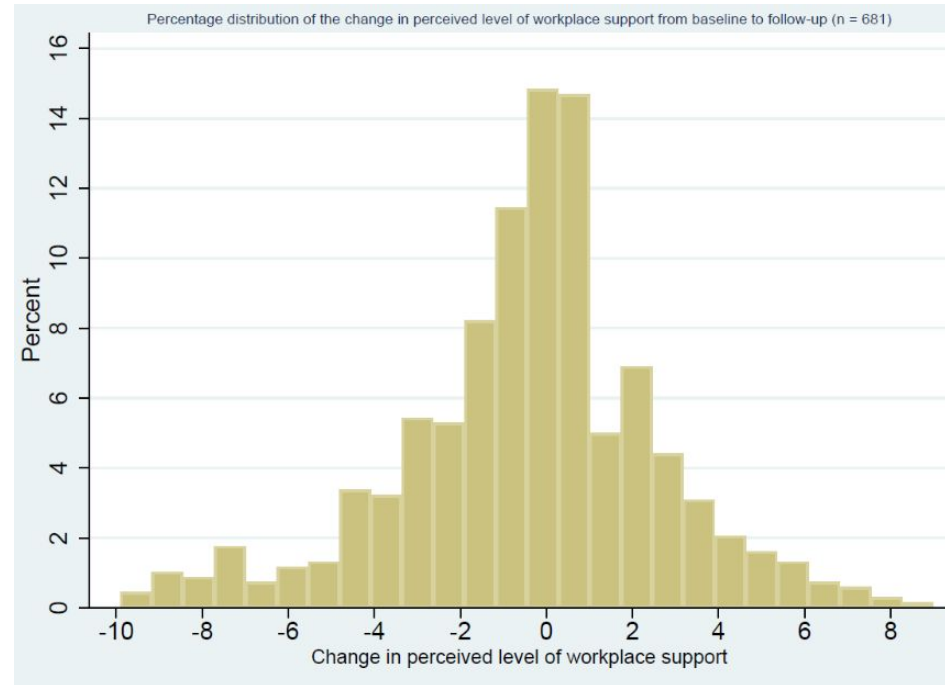

Supplement: open-2022-0191-original-submission.pdf [file open-2022-0191-original-submission.pdf]
